# Supplementary material for: A cooperative Pd/Co catalysis system for the asymmetric (4+2) cycloaddition of vinyl benzoxazinones with N-acylpyrazoles
Source: Royal Society of Chemistry journal article supplement (doi:10.1039/d1cc05952a), 2021-01-01
Supplement: d1cc05952a1.pdf [file d1cc05952a1.pdf]

## Supporting Information

### **A cooperative Pd/Co catalysis for the asymmetric (4+2) cycloaddition of vinyl benzoxazinones with *N*-acylpyrazoles**

Wei Xiong,<sup>a</sup> Xuan Jiang,<sup>a</sup> Mao-Mao Zhang,<sup>a</sup> Wen-Jing Xiao,<sup>a,b</sup> and Liang-Qiu Lu<sup>\*,a,c</sup>

<sup>a</sup>CCNU-uOttawa Joint Research Centre, Key Laboratory of Pesticides & Chemical Biology  
Ministry of Education, College of Chemistry, Central China Normal University, 152 Luoyu  
Road, Wuhan 430079, China

<sup>b</sup>State Key Laboratory of Organometallic Chemistry, Shanghai Institute of Organic  
Chemistry, Chinese Academy of Sciences, Shanghai 200032, China

<sup>c</sup>State Key Laboratory for Oxo Synthesis and Selective Oxidation, Lanzhou Institute of  
Chemical Physics (LICP), Chinese Academy of Sciences, Lanzhou 730000, China

\*E-mail: luliangqiu@mail.ccnu.edu.cn

### Table of Contents

|                                                                                                |     |
|------------------------------------------------------------------------------------------------|-----|
| <b>1. General Information</b> .....                                                            | S2  |
| <b>2. Preparation of Materials</b> .....                                                       | S2  |
| <b>3. Optimization of the Reaction Conditions</b> .....                                        | S3  |
| <b>4. General Procedure and Spectral Data of the Products</b> .....                            | S5  |
| <b>5. Synthetic Transformations</b> .....                                                      | S14 |
| <b>6. X-ray Crystal Structure of Product 3a</b> .....                                          | S19 |
| <b>7. Copy of the NOESY Spectroscopy of Product 10 and 3n</b> .....                            | S20 |
| <b>8. Copies of <sup>1</sup>H NMR, <sup>13</sup>C NMR and <sup>19</sup>F NMR Spectra</b> ..... | S21 |
| <b>9. HPLC Data of Products</b> .....                                                          | S45 |

## 1. General Information

Unless otherwise noted, materials were purchased from commercial suppliers and used without further purification. All the solvents were treated according to general methods. Flash column chromatography was performed using 200-300 mesh silica gel. <sup>1</sup>H NMR spectra were recorded on 400 MHz spectrophotometers. Chemical shifts are reported in delta (δ) units in parts per million (ppm) relative to the singlet (0 ppm) for tetramethylsilane (TMS). Data are reported as follows: chemical shift, multiplicity (s = singlet, d = doublet, t = triplet, q = quartet, dd = doublet of doublets, m = multiplet), coupling constants (Hz) and integration. <sup>13</sup>C NMR spectra were recorded on Varian Mercury 100 MHz with complete proton decoupling spectrophotometers (CDCl<sub>3</sub>: 77.0 ppm). <sup>19</sup>F NMR spectra were recorded on Bruker DPX-400 376 MHz spectrophotometers. HRMS was recorded on Bruker micrOTOFII ESI-TOF using a positive electrospray ionization (ESI+). Measured values are reported to 4 decimal places of the calculated value. Enantiomeric ratio (ee) values were determined by chiral HPLC with AD-H, AZ-H and OD-H columns with hexane and *i*-PrOH as solvents.

## 2. Preparation of Materials

Substrates(**1a-n** and **2**) were prepared according to the reported procedures<sup>[1,2]</sup>. Ligands were synthesized according to the literature<sup>[3,4]</sup> or commercially available.

### References

- [1] (a) C. Wang, J. A. Tunge, *J. Am. Chem. Soc.*, 2008, **130**, 8118; (b) C. Wang, J. A. Tunge, *Tetrahedron.*, 2009, **65**, 5102; (c) T.-R. Li, F. Tan, L.-Q. Lu, Y. Wei, Y.-N. Wang, Y.-Y. Liu, Q.-Q. Yang, J.-R. Chen, D.-Q. Shi, W.-J. Xiao, *Nat. Commun.*, 2014, **5**, 5500; (d) Y. Wei, L.-Q. Lu, T.-R. Li, B. Feng, Q. Wang, W.-J. Xiao, H. Alper, *Angew. Chem., Int. Ed.*, 2016, **55**, 2200; (e) Q. Wang, X.-T. Qi, L.-Q. Lu, T.-R. Li, Z.-G. Yuan, K. Zhang, B.-J. Li, Y. Lan, W.-J. Xiao, *Angew. Chem., Int. Ed.*, 2016, **55**, 2840.
- [2] M. P. Sibi, H. Miyabe, *Org. Lett.*, 2002, **4**, 3435.
- [3] J. Liu, M.-M. Li, B.-L. Qu, L.-Q. Lu, W.-J. Xiao, *Chem. Commun.*, 2019, **55**, 2031
- [4] K. Zhang, L.-Q. Lu, Y. Jia, Y. Wang, F.-D. Lu, F.-F. Pang, W.-J. Xiao, *Angew. Chem., Int. Ed.*, 2019, **58**, 13375.

### 3. Optimization of the Reaction Conditions

#### 3.1 The effect of solvents<sup>a)</sup>

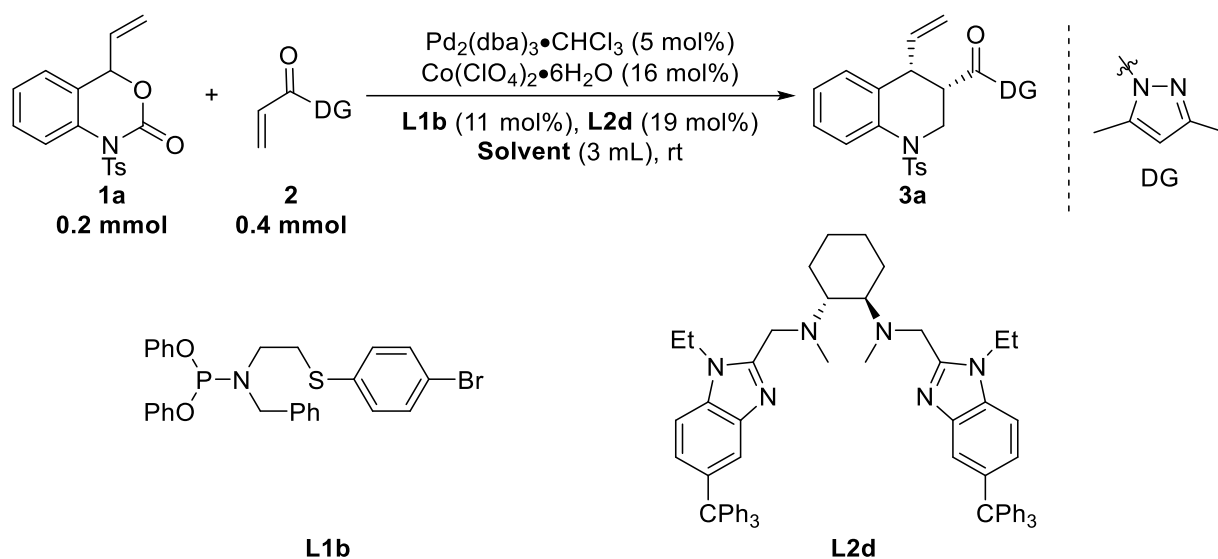

| entry | solvent         | yield (%) <sup>b)</sup> | er <sup>c)</sup> | dr <sup>d)</sup> |
|-------|-----------------|-------------------------|------------------|------------------|
| 1     | DCE             | 72                      | 91.5:8.5         | 14:1             |
| 2     | THF             | 89                      | 82:18            | 14:1             |
| 3     | MeCN            | 85                      | 86:14            | 14:1             |
| 4     | $\text{CHCl}_3$ | 13                      | 86:14            | 10:1             |
| 5     | $\text{CCl}_4$  | trace                   | --               | --               |
| 6     | PhCl            | 8                       | 93.5:6.5         | >19:1            |
| 7     | DCM             | 80                      | 92:8             | 16:1             |

a) Reaction Conditions: **1a** (0.2 mmol), **2a** (0.4 mmol, 2.0 equiv),  $\text{Pd}_2(\text{dba})_3 \cdot \text{CHCl}_3$  (0.01 mmol, 10 mol% Pd), **L1b** (0.022 mmol, 11 mol%),  $\text{Co}(\text{ClO}_4)_2 \cdot 6\text{H}_2\text{O}$  (0.032 mmol, 16 mol%), **L2d** (0.038 mmol, 19 mol%) at room temperature; b) Determined by  $^1\text{H}$  NMR of the reaction mixture with 1,3,5-trimethoxybenzene; c) Determined by Chiral HPLC. d) Determined by  $^1\text{H}$  NMR analysis of the reaction mixture.

### 3.2 The effect of cobalt salts<sup>a)</sup>

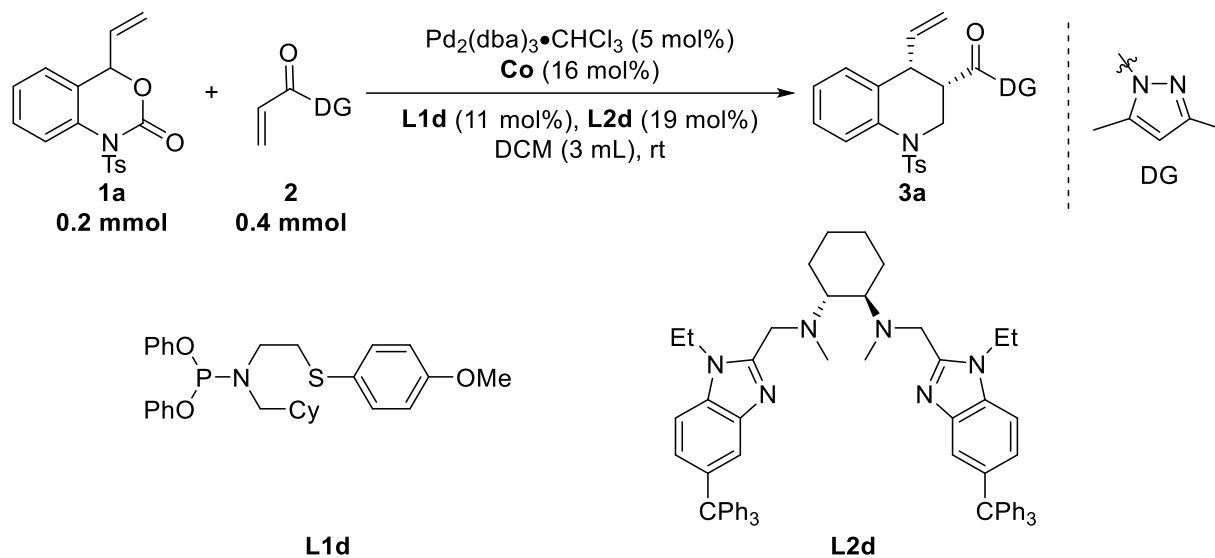

| entry | cobalt salt                                           | yield (%) <sup>b)</sup> | er <sup>c)</sup> | dr <sup>d)</sup> |
|-------|-------------------------------------------------------|-------------------------|------------------|------------------|
| 1     | $\text{Co}(\text{BF}_4)_2 \cdot 6\text{H}_2\text{O}$  | 87                      | 96.5:3.5         | >19:1            |
| 2     | $\text{CoCl}_2 \cdot 6\text{H}_2\text{O}$             | NR                      | --               | --               |
| 3     | $\text{CoCl}_2$                                       | NR                      | --               | --               |
| 4     | $\text{Co}(\text{OAc})_2 \cdot 4\text{H}_2\text{O}$   | NR                      | --               | --               |
| 5     | $\text{Co}(\text{ClO}_4)_2 \cdot 6\text{H}_2\text{O}$ | 81                      | 96:4             | >19:1            |

a) Reaction Conditions: **1a** (0.2 mmol), **2a** (0.4 mmol, 2.0 equiv),  $\text{Pd}_2(\text{dba})_3 \cdot \text{CHCl}_3$  (0.01 mmol, 10 mol% Pd), **L1d** (0.022 mmol, 11 mol%), Co salt (0.032 mmol, 16 mol%) **L2d** (0.038 mmol, 19 mol%) and DCM (3 mL) at room temperature; b) Determined by  $^1\text{H}$  NMR of the reaction mixture with 1,3,5-trimethoxybenzene; c) Determined by Chiral HPLC; d) Determined by  $^1\text{H}$  NMR analysis of the reaction mixture.

## 4. General Procedure and Spectral Data of the Products

### 4.1 General procedure for the synthesis of the 3a-3n

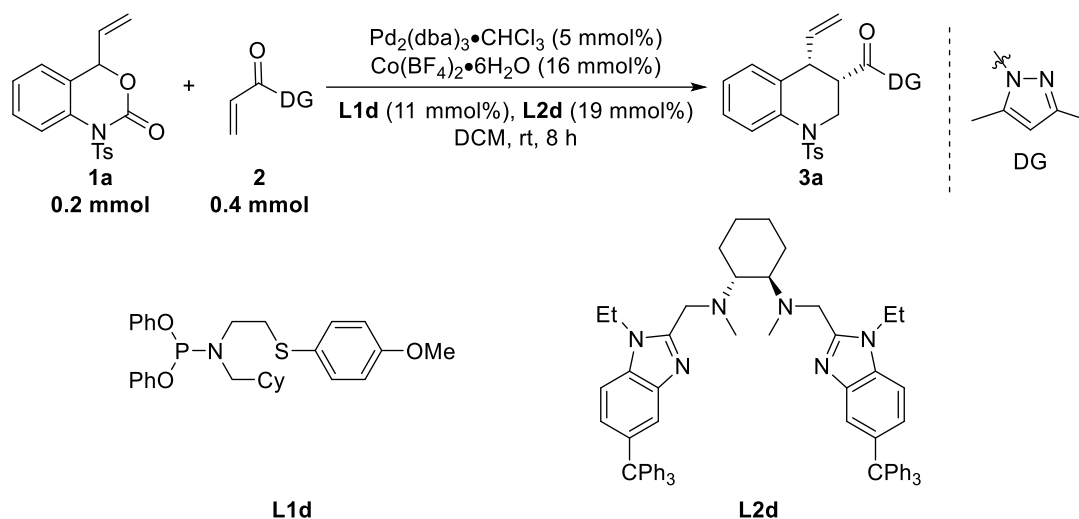

**Procedure A:** Under argon atmosphere, a flame-dried 10 mL Schlenk tube was charged with  $\text{Co}(\text{BF}_4)_2 \cdot 6\text{H}_2\text{O}$  (0.032 mmol, 16 mol%), **L2d** (0.038 mmol, 19 mol%) and anhydrous DCM (1.5 mL). The resulting solution was stirred for 12 h at room temperature to prepare the cobalt complex (solution A). Then, another a flame-dried 10 mL Schlenk tube was charged with  $\text{Pd}_2(\text{dba})_3 \cdot \text{CHCl}_3$  (0.01 mmol, 5 mol%), **L1d** (0.022 mmol, 11 mol%) and anhydrous DCM (1.5 mL) under argon atmosphere, the resulting solution was stirred for 30 min at rt. Then **1a** (0.2 mmol, 1.0 equiv), **2** (0.4 mmol, 2.0 equiv) and solution A were added. The resulting solution was stirred until complete conversion of **1a** (monitored by TLC). The product was purified by flash column chromatography on silica gel (petrol ether/ EtOAc = 20/1 to 10/1) to give product.

**Procedure B:** Under argon atmosphere, a flame-dried 10 mL Schlenk tube was charged with  $\text{Co}(\text{BF}_4)_2 \cdot 6\text{H}_2\text{O}$  (0.016 mmol, 16 mol%), **L2d** (0.019 mmol, 19 mol%) and anhydrous DCM (1.0 mL). The resulting solution was stirred for 12 h at room temperature to prepare the cobalt complex (solution A). Then, another a flame-dried 10 mL Schlenk tube was charged with  $\text{Pd}_2(\text{dba})_3 \cdot \text{CHCl}_3$  (0.005 mmol, 5 mol%), **L1d** (0.011 mmol, 11 mol%) and anhydrous DCM (1.0 mL) under argon atmosphere, the resulting solution was stirred for 30 min at rt. Then **1a** (0.1 mmol, 1.0 equiv), **2** (0.2 mmol, 2.0 equiv) and solution A were added. The resulting solution was stirred until complete conversion of Sub a (monitored by TLC). The product was purified by flash column chromatography on silica gel (petrol ether/ EtOAc = 20/1 to 10/1) to give product.

**Procedure C:** Under argon atmosphere, a flame-dried 10 mL Schlenk tube was charged

with  $\text{Co}(\text{BF}_4)_2 \cdot 6\text{H}_2\text{O}$  (0.016 mmol, 16 mol%), **L2d** (0.019 mmol, 19 mol%) and anhydrous DCM (1.5 mL). The resulting solution was stirred for 12 h at room temperature to prepare the cobalt complex (solution A). Then, another a flame-dried 10 mL Schlenk tube was charged with  $\text{Pd}_2(\text{dba})_3 \cdot \text{CHCl}_3$  (0.005 mmol, 5 mol%), **L1d** (0.011 mmol, 11 mol%) and anhydrous DCM (1.5 mL) under argon atmosphere, the resulting solution was stirred for 30 min at rt. Then **1a** (0.1 mmol, 1.0 equiv), **2** (0.2 mmol, 2.0 equiv) and solution A were added. The resulting solution was stirred until complete conversion of Sub a (monitored by TLC). The product was purified by flash column chromatography on silica gel (petrol ether/ EtOAc = 20/1 to 10/1) to give product.

**Procedure D:** Under argon atmosphere, a flame-dried 10 mL Schlenk tube was charged with  $\text{Co}(\text{BF}_4)_2 \cdot 6\text{H}_2\text{O}$  (0.016 mmol, 16 mol%), **L2d** (0.019 mmol, 19 mol%) and anhydrous DCM (2.0 mL). The resulting solution was stirred for 12 h at room temperature to prepare the cobalt complex (solution A). Then, another a flame-dried 10 mL Schlenk tube was charged with  $\text{Pd}_2(\text{dba})_3 \cdot \text{CHCl}_3$  (0.005 mmol, 5 mol%), **L1d** (0.011 mmol, 11 mol%) and anhydrous DCM (2.0 mL) under argon atmosphere, the resulting solution was stirred for 30 min at rt. Then **1a** (0.1 mmol, 1.0 equiv), **2** (0.2 mmol, 2.0 equiv) and solution A were added. The resulting solution was stirred until complete conversion of Sub a (monitored by TLC). The product was purified by flash column chromatography on silica gel (petrol ether/ EtOAc = 20/1 to 10/1) to give product.

## 4.2 Spectral data of the desired products 3a-3n

### (3,5-Dimethyl-1H-pyrazol-1-yl)((3S,4R)-1-tosyl-4-vinyl-1,2,3,4-tetrahydroquinolin-3-yl)methanone **3a** (Procedure A)

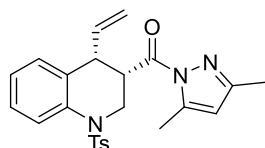

White solid, 83% yield,  $[\alpha]_{\text{D}}^{25} = 67.4$  ( $c = 1.00$  in  $\text{CHCl}_3$ ); er = 96.5:3.5, dr > 95:5, determined by HPLC analysis (Chiralpak OD column, hexane/i-PrOH, 95:5 v/v, flow rate 1 mL/min,  $\lambda = 254$  nm, 25 °C),  $t_{\text{R}}$  (major) = 9.08 min,  $t_{\text{R}}$  (minor) = 11.29 min. **<sup>1</sup>H NMR** (400 MHz,  $\text{CDCl}_3$ )  $\delta$  = 7.86 (d,  $J = 8.4$  Hz, 1H), 7.58 (d,  $J = 8.1$  Hz, 2H), 7.26 – 7.18 (m, 3H), 7.12 – 7.01 (m, 2H), 5.94 (s, 1H), 5.59 (ddd,  $J = 17.8, 10.0, 8.1$  Hz, 1H), 4.86 (dd,  $J = 10.1, 1.6$  Hz, 1H), 4.54 (d,  $J = 16.8$  Hz, 1H), 4.46 – 4.39 (m, 1H), 3.95 (m,  $J = 11.5, 5.7, 2.9$  Hz, 2H), 3.63 (dd,  $J = 14.0, 11.5$  Hz, 1H), 2.47 (s, 3H), 2.39 (s, 3H), 2.18 (s, 3H). **<sup>13</sup>C NMR** (100 MHz,  $\text{CDCl}_3$ )  $\delta$  = 172.02, 152.25, 143.86,

143.80, 137.04, 136.34, 136.03, 130.65, 129.76, 129.25, 127.22, 127.19, 124.46, 123.35, 117.45, 111.15, 43.68, 43.54, 41.27, 21.52, 14.20, 13.81. **HRMS (ESI)** for C<sub>24</sub>H<sub>25</sub>N<sub>3</sub>O<sub>3</sub>S [M + H]<sup>+</sup>: calcd 436.1698, found 436.1690.

**(3,5-Dimethyl-1H-pyrazol-1-yl)((3S,4R)-7-fluoro-1-tosyl-4-vinyl-1,2,3,4-tetrahydroquinolin-3-yl)methanone 3b (Procedure B)**

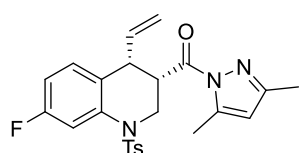

Colourless oil, 80% yield,  $[\alpha]_{\text{D}}^{25} = 10.9$  ( $c = 1.00$  in CHCl<sub>3</sub>); er = 96.5:3.5, dr = 8:1 (0.1 mmol, 2mL DCM), determined by HPLC analysis (Chiralpak OD column, hexane/i-PrOH, 95:5 v/v, flow rate 1 mL/min,  $\lambda = 254$  nm, 25 °C),  $t_{\text{R}}$  (major) = 12.14 min,  $t_{\text{R}}$  (minor) = 21.38 min. **<sup>1</sup>H NMR** (400 MHz, CDCl<sub>3</sub>)  $\delta = 7.72$  (s, 1H, minor) 7.69 - 7.59 (m, 3H, major), 7.25 (d,  $J = 8.2$  Hz, 2H, major), 7.00 (dd,  $J = 8.6, 6.5$  Hz, 1H, major), 6.79 (m,  $J = 8.2, 2.6$  Hz, 1H, major), 5.95 (s, 1H, major), 5.58 (m,  $J = 17.5, 10.0, 7.9$  Hz, 1H, major), 4.88 (dd,  $J = 10.1, 1.5$  Hz, 1H, major), 4.51 (d,  $J = 16.8$  Hz, 1H, major), 4.46 - 4.38 (m, 1H, major), 4.03 - 3.88 (m, 2H, major), 3.61 (dd,  $J = 13.7, 11.6$  Hz, 1H, major), 2.50 (s, 1H, minor), 2.48 (s, 3H, major), 2.40 (s, 3H, major+minor), 2.36 (s, 1H, minor), 2.19 (s, 3H, major). **<sup>13</sup>C NMR** (100 MHz, CDCl<sub>3</sub>)  $\delta = 171.77, 144.17, 143.96, 136.88, 135.90, 131.83, 129.89, 127.22, 124.60, 117.82, 111.66, 111.44, 111.28, 109.95, 109.69, 43.36, 43.25, 41.29, 21.57, 14.25, 13.84$ . **<sup>19</sup>F NMR** (376 MHz, CDCl<sub>3</sub>)  $\delta = -113.47$ . **HRMS (ESI)** for C<sub>24</sub>H<sub>24</sub>FN<sub>3</sub>O<sub>3</sub>S [M + H]<sup>+</sup>: calcd 454.1595, found 454.1591.

**((3S,4R)-7-Chloro-1-tosyl-4-vinyl-1,2,3,4-tetrahydroquinolin-3-yl)(3,5-dimethyl-1H-pyrazol-1-yl)methanone 3c (Procedure C)**

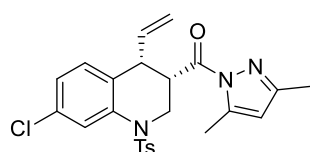

White solid, 90% yield,  $[\alpha]_{\text{D}}^{25} = 15.3$  ( $c = 1.00$  in CHCl<sub>3</sub>); er = 96.5:3.5, dr = 11:1, determined by HPLC analysis (Chiralpak OD column, hexane/i-PrOH, 95:5 v/v, flow rate 1 mL/min,  $\lambda = 254$  nm, 25 °C),  $t_{\text{R}}$  (major) = 10.41 min,  $t_{\text{R}}$  (minor) = 17.04 min. **<sup>1</sup>H NMR** (400 MHz, CDCl<sub>3</sub>)  $\delta = 7.96$  (s, 1H, minor), 7.91 (d,  $J = 2.1$  Hz, 1H, major), 7.72 (d,  $J = 8.1$  Hz, 2H, minor), 7.62 (d,  $J = 8.0$  Hz, 2H, major), 7.29 - 7.23 (m, 2H, major), 7.04 (dd,  $J = 8.3, 2.1$  Hz, 1H, major), 6.97 (d,  $J = 8.3$  Hz, 1H, major), 6.01 (s, 1H, minor), 5.95 (s, 1H, major), 5.56 (m,  $J = 17.4, 10.0, 7.9$  Hz, 1H, major), 4.88 (dd,  $J = 10.0, 1.5$  Hz, 1H, major), 4.52 (d,  $J = 16.8$  Hz, 1H, major), 4.40 (dd,  $J = 14.3, 3.0$  Hz, 1H, major), 4.03 - 3.88 (m, 2H, major), 3.59 (dd,  $J = 13.8, 11.6$  Hz, 1H, major), 2.50 (s, 3H, minor), 2.47 (s, 3H, major), 2.40 (s, 3H, major), 2.38 (s, 3H, minor), 2.36

(s, 3H, minor), 2.18 (s, 3H, major).  $^{13}\text{C}$  NMR (100 MHz,  $\text{CDCl}_3$ )  $\delta$  = 144.18, 143.94, 137.06, 136.61, 135.86, 132.73, 131.64, 129.90, 127.54, 127.24, 124.54, 122.92, 117.99, 111.28, 43.39, 43.30, 41.15, 21.58, 14.24, 13.84. **HRMS (ESI)** for  $\text{C}_{24}\text{H}_{24}\text{ClN}_3\text{O}_3\text{S}$   $[\text{M} + \text{H}]^+$ : calcd 470.1300, found 470.1305.

**((3S,4R)-7-Bromo-1-tosyl-4-vinyl-1,2,3,4-tetrahydroquinolin-3-yl)(3,5-dimethyl-1H-pyrazol-1-yl)methanone 3d (Procedure B)**

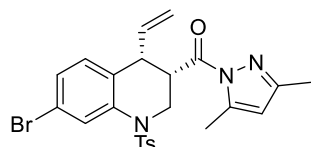

Colourless oil, 83% yield,  $[\alpha]_{\text{D}}^{25} = 3.2$  ( $c = 1.00$  in  $\text{CHCl}_3$ ); er = 95:5, dr = 10:1, determined by HPLC analysis (Chiralpak OD column, hexane/i-PrOH, 95:5 v/v, flow rate 1 mL/min,  $\lambda = 254$  nm, 25 °C),  $t_{\text{R}}$  (major) = 11.34 min,  $t_{\text{R}}$  (minor) = 21.45 min.  $^1\text{H}$  NMR (400 MHz,  $\text{CDCl}_3$ )  $\delta$  = 8.06 (d,  $J = 1.9$  Hz, 1H, major), 7.61 (d,  $J = 8.2$  Hz, 2H, major), 7.29 – 7.24 (m, 2H, major), 7.19 (dd,  $J = 8.2$ , 2.0 Hz, 1H, major), 6.91 (d,  $J = 8.3$  Hz, 1H, major), 5.95 (s, 1H, major), 5.64 – 5.45 (m, 1H, major), 4.88 (dd,  $J = 10.1$ , 1.5 Hz, 1H, major), 4.52 (d,  $J = 16.8$  Hz, 1H, major), 4.45 – 4.33 (m, 1H), 4.01 – 3.86 (m, 2H, major), 3.68 – 3.49 (m, 1H, major), 2.50 (s, 3H, minor), 2.47 (s, 3H, major), 2.40 (s, 3H, major+minor), 2.36 (s, 3H, minor), 2.19 (s, 3H, major).  $^{13}\text{C}$  NMR (100 MHz,  $\text{CDCl}_3$ )  $\delta$  = 171.69, 152.48, 144.24, 143.95, 137.27, 136.52, 135.78, 131.97, 129.93, 128.10, 127.48, 127.28, 125.85, 120.59, 118.07, 111.31, 43.38, 43.36, 41.07, 21.62, 14.29, 13.89. **HRMS (ESI)** for  $\text{C}_{24}\text{H}_{24}\text{BrN}_3\text{O}_3\text{S}$   $[\text{M} + \text{H}]^+$ : calcd 514.0795, found 514.0783.

**(3,5-Dimethyl-1H-pyrazol-1-yl)((3S,4R)-7-methyl-1-tosyl-4-vinyl-1,2,3,4-tetrahydroquinolin-3-yl)methanone 3e (Procedure B)**

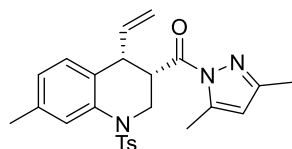

Colourless oil, 73% yield.  $[\alpha]_{\text{D}}^{25} = 18.4$  ( $c = 1.00$  in  $\text{CHCl}_3$ ); er = 95.5:4.5, dr = 8:1, determined by HPLC analysis (Chiralpak OD column, hexane/i-PrOH, 95:5 v/v, flow rate 1 mL/min,  $\lambda = 254$  nm, 25 °C),  $t_{\text{R}}$  (major) = 9.88 min,  $t_{\text{R}}$  (minor) = 17.74 min.  $^1\text{H}$  NMR (400 MHz,  $\text{CDCl}_3$ )  $\delta$  = 7.68 (s, 1H, major), 7.58 (d,  $J = 8.1$  Hz, 2H, major), 7.22 (d,  $J = 8.1$  Hz, 2H, major), 6.97 – 6.82 (m, 2H, major), 5.93 (s, 1H, major), 5.57 (m,  $J = 17.2$ , 10.0, 7.8 Hz, 1H, major), 4.84 (dd,  $J = 10.0$ , 1.7 Hz, 1H, major), 4.53 (dd,  $J = 16.9$ , 1.7 Hz, 1H, major), 4.46 – 4.28 (m, 1H), 3.90 (m,  $J = 6.1$ , 3.4 Hz, 2H, major), 3.67 – 3.53 (m, 1H, major),  $\delta$  2.49 (s, 3H, minor), 2.46 (s, 3H, major), 2.39 (s, 3H, major+minor), 2.37 (s, 3H, minor), 2.35 (s, 3H, major+minor), 2.17 (s, 3H, major).  $^{13}\text{C}$  NMR (100 MHz,  $\text{CDCl}_3$ )  $\delta$  = 172.19, 152.18, 143.83, 143.76, 137.26, 137.04, 136.39, 135.81, 130.41, 129.75, 127.22, 126.32, 125.59, 123.90, 117.19, 111.12, 43.58, 43.34, 41.20,

21.56, 21.41, 14.23, 13.84. **HRMS (ESI)** for C<sub>25</sub>H<sub>27</sub>N<sub>3</sub>O<sub>3</sub>S [M + H]<sup>+</sup>: calcd 450.1846, found 450.1845.

**(3,5-Dimethyl-1H-pyrazol-1-yl)((3S,4R)-1-tosyl-7-(trifluoromethyl)-4-vinyl-1,2,3,4-tetrahydroquinolin-3-yl)methanone 3f (Procedure B)**

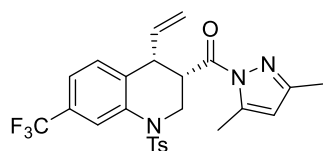

Colourless oil, 73% yield.  $[\alpha]_D^{25} = 97.1$  ( $c = 3.00$  in CHCl<sub>3</sub>); er = 95:5, dr = 10:1, determined by HPLC analysis (Chiralpak OD column, hexane/i-PrOH, 95:5 v/v, flow rate 1 mL/min,  $\lambda = 254$  nm, 25 °C),  $t_R$  (major) = 9.00 min,  $t_R$  (minor) = 17.29 min. **<sup>1</sup>H NMR** (400 MHz, CDCl<sub>3</sub>)  $\delta$  = 8.18 (d,  $J = 1.6$  Hz, 1H), 7.61 (d,  $J = 8.2$  Hz, 2H), 7.32 – 7.23 (m, 3H), 7.18 (d,  $J = 8.1$  Hz, 1H), 6.03 – 5.89 (m, 1H), 5.59 (m,  $J = 16.9, 10.1, 8.3$  Hz, 1H), 4.92 (dd,  $J = 10.0, 1.4$  Hz, 1H), 4.54 (m,  $J = 16.9, 1.2$  Hz, 1H), 4.44 (m,  $J = 13.8, 3.4, 1.2$  Hz, 1H), 4.06 (t,  $J = 7.1$  Hz, 1H), 3.97 (m,  $J = 12.0, 5.8, 3.4$  Hz, 1H), 3.65 (dd,  $J = 13.8, 12.0$  Hz, 1H), 2.48 (s, 3H), 2.39 (s, 3H), 2.19 (s, 3H). **<sup>13</sup>C NMR** (100 MHz, CDCl<sub>3</sub>)  $\delta$  = 171.45, 152.60, 144.38, 144.02, 136.55, 136.22, 135.69, 132.80, 131.28, 129.93, 127.31, 120.64, 120.60, 120.01, 119.97, 118.48, 111.37, 43.71, 43.47, 41.15, 21.55, 14.22, 13.83. **<sup>19</sup>F NMR** (376 MHz, CDCl<sub>3</sub>)  $\delta$  = -62.59. **HRMS (ESI)** for C<sub>25</sub>H<sub>24</sub>F<sub>3</sub>N<sub>3</sub>O<sub>3</sub>S [M + H]<sup>+</sup>: calcd 504.1563, found 504.1559.

**((3S,4R)-6-Chloro-1-tosyl-4-vinyl-1,2,3,4-tetrahydroquinolin-3-yl)(3,5-dimethyl-1H-pyrazol-1-yl)methanone 3g (Procedure C)**

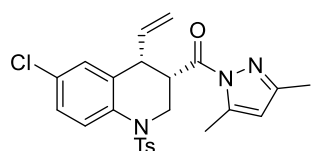

Colourless oil, 81% yield.  $[\alpha]_D^{25} = 14.6$  ( $c = 1.00$  in CHCl<sub>3</sub>); er = 91:9, dr = 5:1, determined by HPLC analysis (Chiralpak OD column, hexane/i-PrOH, 95:5 v/v, flow rate 1 mL/min,  $\lambda = 254$  nm, 25 °C),  $t_R$  (major) = 13.39 min,  $t_R$  (minor) = 17.85 min. **<sup>1</sup>H NMR** (400 MHz, CDCl<sub>3</sub>) 7.87 (d,  $J = 9.0$  Hz, 1H, minor),  $\delta$  = 7.83 (d,  $J = 8.9$  Hz, 1H, major), 7.68 (d,  $J = 8.1$  Hz, 1H, minor), 7.62 (d,  $J = 4.3$  Hz, 1H, minor), 7.45 – 7.38 (m, 1H, minor), 7.57 (d,  $J = 8.0$  Hz, 2H, major), 7.24 (d,  $J = 8.0$  Hz, 2H, major), 7.19 (dd,  $J = 9.0, 2.6$  Hz, 1H, major), 7.15 (d, 1H, minor), 7.09 (d,  $J = 15.9$  Hz, 1H, minor), 7.03 (d,  $J = 2.5$  Hz, 1H, major), 6.01 (s, 1H, minor), 5.94 (s, 1H, major), 5.66 – 5.38 (m, 1H, major), 4.95 (d,  $J = 4.8$  Hz, 1H, minor), 4.89 (d,  $J = 10.0$  Hz, 1H, major), 4.54 (d,  $J = 16.9$  Hz, 1H, major), 4.39 (dd,  $J = 13.9, 3.3$  Hz, 1H, major), 4.01 – 3.81 (m, 2H, major), 3.60 (dd,  $J = 13.9, 11.9$  Hz, 1H, major), 2.49 (s, 3H, minor), 2.47 (s, 3H, major), 2.39 (s, 3H, major+minor), 2.36 (s, 3H, minor), 2.18 (s, 3H, major). **<sup>13</sup>C NMR** (100 MHz, CDCl<sub>3</sub>)  $\delta$  = 171.61, 152.43, 144.11, 143.92, 136.33, 135.91, 134.68, 131.12, 130.24, 129.90, 127.40,

127.21, 124.82, 118.16, 111.27, 43.58, 43.51, 40.92, 21.57, 14.21, 13.83. **HRMS (ESI)** for  $C_{24}H_{24}ClN_3O_3S$   $[M + H]^+$ : calcd 470.1300, found 470.1295.

**(3,5-Dimethyl-1H-pyrazol-1-yl)((3S,4R)-6-methyl-1-tosyl-4-vinyl-1,2,3,4-tetrahydroquinolin-3-yl)methanone 3h (Procedure C)**

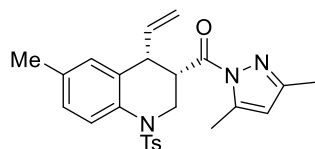

Colourless oil, 78% yield.  $[\alpha]_D^{25} = 53$  ( $c = 1.00$  in  $CHCl_3$ ); er = 92.5:7.5, dr = 5:1, determined by HPLC analysis (Chiralpak AD column, hexane/i-PrOH, 95:5 v/v, flow rate 1 mL/min,  $\lambda = 254$  nm, 25 °C),  $t_R$  (minor) = 14.02 min,  $t_R$  (major) = 15.20 min.  **$^1H$  NMR** (400 MHz,  $CDCl_3$ )  $\delta$  = 7.80 (d,  $J = 8.4$  Hz, 1H, minor), 7.75 (d,  $J = 8.5$  Hz, 1H, major), 7.69 – 7.65 (m, 2H, minor), 7.56 (d,  $J = 8.3$  Hz, 2H, major), 7.42 (m,  $J = 4.6, 2.9$  Hz, 2H, minor), 7.22 (d,  $J = 7.9$  Hz, 2H, major), 7.14 – 7.06 (m, 1H, minor), 7.03 (dd,  $J = 8.6, 2.2$  Hz, 1H, major), 6.96 (d, 1H, minor), 6.84 (d,  $J = 2.1$  Hz, 1H, major), 6.00 (s, 1H, minor), 5.93 (s, 1H, major), 5.66 – 5.44 (m, 1H, major), 5.07 – 4.88 (m, 2H, minor), 4.85 (dd,  $J = 10.0, 1.7$  Hz, 1H, major), 4.73 (dd,  $J = 13.7, 3.9$  Hz, 1H, minor), 4.53 (dd,  $J = 16.9, 1.6$  Hz, 1H, major), 4.39 (m,  $J = 13.9, 3.0, 1.7$  Hz, 1H, major), 3.89 (m,  $J = 8.5, 2.3$  Hz, 2H, major), 3.70 – 3.55 (m, 1H, major), 2.50 (s, 3H, minor), 2.46 (s,  $J = 1.0$  Hz, 3H, major), 2.36 (d,  $J = 1.8$  Hz, 6H, minor), 2.38 (s, 3H, major), 2.30 (s, 3H, minor), 2.27 (s, 3H, major), 2.17 (s, 3H, major).  **$^{13}C$  NMR** (100 MHz,  $CDCl_3$ )  $\delta$  = 172.16, 152.20, 143.83, 143.72, 137.14, 136.26, 134.21, 133.41, 130.95, 129.76, 129.11, 128.11, 127.22, 123.46, 117.28, 111.13, 43.65, 43.55, 41.12, 21.57, 20.72, 14.24, 13.84. **HRMS (ESI)** for  $C_{25}H_{27}N_3O_3S$   $[M + H]^+$ : calcd 450.1846, found 450.1841.

**(3,5-Dimethyl-1H-pyrazol-1-yl)((3S,4R)-6-methoxy-1-tosyl-4-vinyl-1,2,3,4-tetrahydroquinolin-3-yl)methanone 3i (Procedure C)**

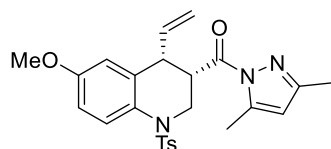

Colourless oil, 73% yield.  $[\alpha]_D^{25} = 3.63$  ( $c = 1.00$  in  $CHCl_3$ ); er = 94.5:5.5, dr = 4:1, determined by HPLC analysis (Chiralpak AD column, hexane/i-PrOH, 95:5 v/v, flow rate 1 mL/min,  $\lambda = 254$  nm, 25 °C),  $t_R$  (minor) = 21.68 min,  $t_R$  (major) = 26.65 min.  **$^1H$  NMR** (400 MHz,  $CDCl_3$ )  $\delta$  = 7.80 (d,  $J = 9.1$  Hz, 1H), 7.52 (d,  $J = 8.2$  Hz, 2H), 7.21 (d,  $J = 8.0$  Hz, 2H), 6.81 (dd,  $J = 9.1, 3.0$  Hz, 1H), 6.55 (d,  $J = 3.0$  Hz, 1H), 5.93 (s, 1H), 5.64 – 5.43 (m, 1H), 4.84 (dd,  $J = 10.1, 1.7$  Hz, 1H), 4.54 (dd,  $J = 16.9, 1.6$  Hz, 1H), 4.37 (dt,  $J = 14.1, 1.9$  Hz, 1H), 3.84 (dt,  $J = 8.6, 2.2$  Hz, 2H), 3.77 (s, 3H), 3.60 (ddd,  $J = 14.1, 8.9, 3.0$  Hz, 1H), 2.46 (s, 3H), 2.39 (s, 3H), 2.17 (s, 3H).  **$^{13}C$  NMR** (100 MHz,  $CDCl_3$ )  $\delta$  = 172.11, 156.61, 152.15, 143.82, 143.69, 136.98, 136.16, 131.09,

129.77, 129.03, 127.27, 125.58, 117.32, 114.97, 113.23, 111.11, 55.40, 43.73, 43.67, 40.72, 21.57, 14.21, 13.84. **HRMS (ESI)** for  $C_{25}H_{27}N_3O_4S$   $[M + H]^+$ : calcd 466.1795, found 466.1792.

**(3,5-Dimethyl-1H-pyrazol-1-yl)((3S,4R)-5-fluoro-1-tosyl-4-vinyl-1,2,3,4-tetrahydroquinolin-3-yl)methanone 3j (Procedure A)**

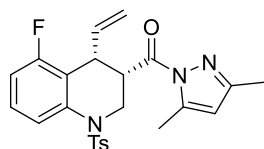

White solid, 96% yield.  $[\alpha]_D^{25} = 39.4$  ( $c = 1.00$  in  $CHCl_3$ ); er = 96:4, dr = 10:1, determined by HPLC analysis (Chiralpak OD column, hexane/i-PrOH, 95:5 v/v, flow rate 1 mL/min,  $\lambda = 254$  nm, 25 °C),  $t_R$  (major) = 11.25 min,  $t_R$  (minor) = 13.30 min.  **$^1H$  NMR** (400 MHz,  $CDCl_3$ )  $\delta = 7.74$  (d,  $J = 8.5$  Hz, 1H, major), 7.68 (d,  $J = 8.4$  Hz, 1H, minor), 7.60 (d,  $J = 8.0$  Hz, 2H, major), 7.44 – 7.38 (m, 2H, minor), 7.24 (d,  $J = 8.1$  Hz, 3H, major+minor), 7.10 (d,  $J = 16.0$  Hz, 1H, minor), 6.80 (t,  $J = 8.7$  Hz, 1H, major), 6.01 (s, 1H, minor), 5.96 (s, 1H, major), 5.51 (m,  $J = 17.2, 10.1, 7.4$  Hz, 1H, major), 4.94 (d,  $J = 10.1$  Hz, 1H, major), 4.80 (d,  $J = 10.1$  Hz, 1H, minor), 4.69 (d,  $J = 17.1$  Hz, 1H, minor), 4.57 (dd,  $J = 13.6, 4.2$  Hz, 1H, minor), 4.53 – 4.40 (m, 2H, major), 4.29 (t,  $J = 6.4$  Hz, 1H, major), 3.84 (m,  $J = 12.4, 5.4, 3.1$  Hz, 1H, major), 3.63 (t,  $J = 13.0$  Hz, 1H, major), 2.50 (s, 3H, major+minor), 2.39 (s, 3H, major), 2.37 (s, 6H, minor), 2.19 (s, 3H, major).  **$^{13}C$  NMR** (100 MHz,  $CDCl_3$ )  $\delta = 171.56, 161.86, 159.41, 152.58, 144.16, 143.91, 137.47, 135.76, 134.69, 129.86, 127.85, 127.24, 118.42, 118.26, 117.31, 111.40, 110.76, 42.93, 40.53, 37.60, 37.56, 21.57, 14.28, 13.85$ .  **$^{19}F$  NMR** (376 MHz,  $CDCl_3$ )  $\delta = 114.65$ . **HRMS (ESI)** for  $C_{24}H_{24}FN_3O_3S$   $[M + H]^+$ : calcd 454.1595, found 454.1583.

**(3,5-Dimethyl-1H-pyrazol-1-yl)((3S,4R)-5-methyl-1-tosyl-4-vinyl-1,2,3,4-tetrahydroquinolin-3-yl)methanone 3k (Procedure D)**

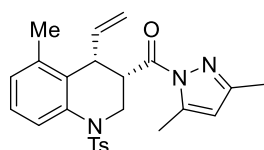

Colourless oil, 90% yield.  $[\alpha]_D^{25} = 5.5$  ( $c = 1.00$  in  $CHCl_3$ ); er = 94.5:5.5, dr = 1:1, determined by HPLC analysis (Chiralpak AZ column, hexane/i-PrOH, 98:2 v/v, flow rate 1 mL/min,  $\lambda = 254$  nm, 25 °C),  $t_R$  (major) = 29.55 min,  $t_R$  (minor) = 34.51 min.  **$^1H$  NMR** (400 MHz,  $CDCl_3$ )  $\delta = 7.84$  (d,  $J = 8.4$  Hz, 1H, minor), 7.76 (d,  $J = 8.0$  Hz, 2H, major), 7.70 (d,  $J = 8.3$  Hz, 1H, minor), 7.58 (d,  $J = 8.0$  Hz, 1H, major+minor), 7.21 (m,  $J = 8.1, 4.1$  Hz, 3H, minor), 7.14 (m,  $J = 7.9, 5.7$  Hz, 3H, major), 6.99 (d,  $J = 7.5$  Hz, 1H, major), 6.94 (d,  $J = 7.5$  Hz, 1H, minor), 6.01 (s, 1H, major), 5.97 (s, 1H, minor), 5.34 (m,  $J = 17.0, 10.2, 6.8$  Hz, 1H, minor), 4.99 (m,  $J = 17.0, 10.1, 6.6$  Hz, 1H, major), 4.84 (d,  $J = 10.2$  Hz, 1H, minor), 4.74 (d,  $J = 10.1$  Hz, 1H, major), 4.60 – 4.51 (m, 2H, major), 4.33 – 4.20 (m, 2H, minor), 4.15 (m,  $J = 7.7, 3.6$  Hz, 2H, major), 4.12 – 4.08 (m, 1H, major), 3.84 (m,  $J = 12.4, 5.4, 3.1$  Hz, 1H, major), 3.63 (t,  $J = 13.0$  Hz, 1H, major), 2.50 (s, 3H, major+minor), 2.39 (s, 3H, major), 2.37 (s, 6H, minor), 2.19 (s, 3H, major).

**(3,5-Dimethyl-1H-pyrazol-1-yl)((3S,4R)-1-tosyl-4-vinyl-1,2,3,4-tetrahydrobenzo[g]quinolin-3-yl)methanone 3l (Procedure C)**

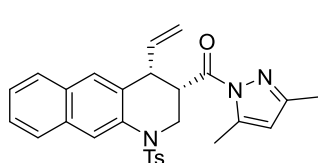

**(3,5-Dimethyl-1H-pyrazol-1-yl)((3S,4R)-8-fluoro-1-tosyl-4-vinyl-1,2,3,4-tetrahydroquinolin-3-yl)methanone 3m (Procedure A)**

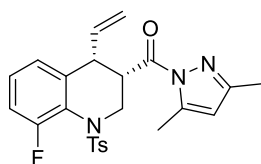

S12

137.09, 133.77, 129.58, 127.41 (d,  $J = 16.0$  Hz), 126.04, 125.93 (d,  $J = 24.0$  Hz), 124.80 (d,  $J = 48.0$  Hz), 117.50, 114.20 (d,  $J = 84.0$ ), 111.22, 44.16, 43.69, 42.94, 21.61, 14.25, 13.91.  **$^{19}\text{F}$  NMR** (376 MHz,  $\text{CDCl}_3$ )  $\delta = -114.67$ . **HRMS (ESI)** for  $\text{C}_{24}\text{H}_{24}\text{FN}_3\text{O}_3\text{S}$   $[\text{M} + \text{H}]^+$ : calcd 454.1595, found 454.1583.

**(3,5-Dimethyl-1H-pyrazol-1-yl)((3S,4R)-4-methyl-1-tosyl-4-vinyl-1,2,3,4-tetrahydroquinolin-3-yl)methanone 3n (Procedure A)**

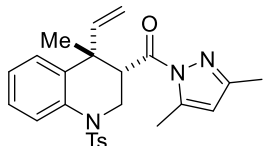

Colourless oil, 88% yield.  $[\alpha]_{\text{D}}^{25} = -2.9$  ( $c = 1.00$  in  $\text{CHCl}_3$ ); er = 85.5:14.5, dr = 4.6:1, determined by HPLC analysis (Chiralpak AZ column, hexane/*i*-PrOH, 99.5:0.5 v/v, flow rate 0.5 mL/min,  $\lambda = 254$  nm, 25 °C),  $t_{\text{R}}$  (minor) = 60.50 min,  $t_{\text{R}}$  (major) = 71.51 min.  **$^1\text{H}$  NMR** (400 MHz,  $\text{CDCl}_3$ )  $\delta = 7.89$  (d,  $J = 8.6$  Hz, 1H, major), 7.58 (d,  $J = 8.2$  Hz, 2H, major+minor), 7.22 (d,  $J = 8.6$  Hz, 3H, major), 7.18 (d,  $J = 2.1$  Hz, 3H, minor), 7.10 (m, 2H, minor), 7.00 – 6.99 (m, 2H, major), 6.08 – 5.96 (m, 2H, minor), 5.94 (s, 1H, major), 5.59 (dd,  $J = 17.3, 10.6$  Hz, 1H, major), 4.89 (d,  $J = 10.6$  Hz, 1H, major), 4.79 (d,  $J = 17.3$  Hz, 1H, major), 4.44 (s, 1H, minor), 4.39 (dd,  $J = 10.8, 3.9$  Hz, 1H, major), 4.34 (m,  $J = 3.0$  Hz, 1H, minor), 4.30 (dd,  $J = 13.4, 3.9$  Hz, 1H, major), 3.97 (dd,  $J = 13.2, 10.7$  Hz, 1H, major), 2.50 (s, 3H, minor), 2.47 (s, 3H, major), 2.39 (s, 3H, major), 2.21 (s, 3H, minor), 2.18 (s, 3H, major), 1.17 (s, 3H, major), 1.16 (s, 3H, minor).  **$^{13}\text{C}$  NMR** (100 MHz,  $\text{CDCl}_3$ )  $\delta = 171.84, 151.40, 144.40, 143.80, 143.67, 136.09, 135.34, 134.59, 129.64, 128.13, 127.34, 127.05, 124.35, 122.70, 113.96, 111.73, 45.01, 43.95, 43.14, 21.75, 21.58, 14.49, 13.78$ . **HRMS (ESI)** for  $\text{C}_{25}\text{H}_{27}\text{N}_3\text{O}_3\text{S}$   $[\text{M} + \text{H}]^+$ : calcd 450.1846, found 450.1845.

**4.3 Unsuccessful Substrates**

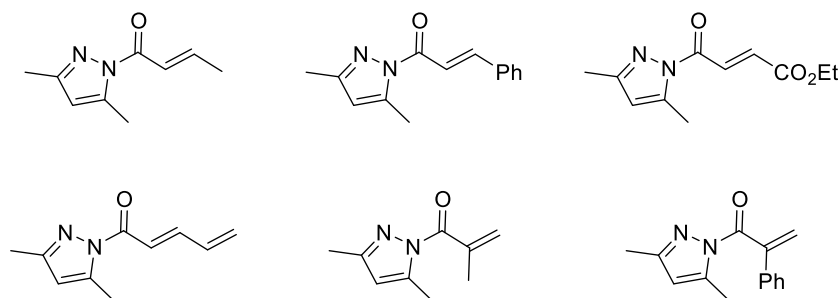

## 5. Synthetic Transformation

### 5.1 Synthesis of Product 5

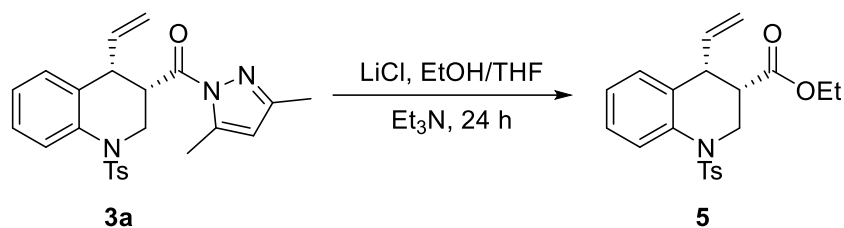

**Procedure E:** Compound **3a** (43.5 mg, 0.1 mmol) was dissolved into 1 mL EtOH/THF (4:1) in an oven-dried 10 mL flask containing a stir bar under Ar atmosphere. Then, LiCl (21.2 mg, 0.5 mmol) and Et<sub>3</sub>N (50.5 mg, 0.5 mmol) were added and the resulting solution was stirring at this temperature for 24 h. The product was purified by flash column chromatography on silica gel (petrol ether/ EtOAc = 20/1 to 10/1) to give product **5**. The diastereomer ration (dr value) was determined by <sup>1</sup>H NMR of the reaction mixture and the enantiomeric excess (ee value) of purified product was determined by chiral HPLC.

### Ethyl (3S,4R)-1-tosyl-4-vinyl-1,2,3,4-tetrahydroquinoline-3-carboxylate **5**

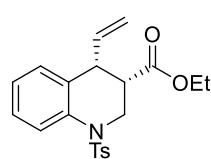

Colourless oil, 94% yield.  $[\alpha]_D^{25} = 56.3$  ( $c = 1.00$  in CHCl<sub>3</sub>); er = 96.5:3.5, dr = 18:1, determined by HPLC analysis (Chiralpak AD column, hexane/i-PrOH, 95:5 v/v, flow rate 1 mL/min,  $\lambda = 254$  nm, 25 °C),  $t_R$  (minor) = 22.14 min,  $t_R$  (major) = 22.45 min. **<sup>1</sup>H NMR** (400 MHz, CDCl<sub>3</sub>)  $\delta$  = 7.90 (d,  $J = 8.4$  Hz, 1H), 7.56 (d,  $J = 8.3$  Hz, 2H), 7.24 – 7.17 (m, 3H), 7.10 – 6.97 (m, 2H), 5.53 (m,  $J = 17.3, 10.1, 7.7$  Hz, 1H), 4.94 (d,  $J = 10.1$  Hz, 1H), 4.70 (d,  $J = 16.9$  Hz, 1H), 4.39 (dd,  $J = 13.6, 3.8$  Hz, 1H), 4.15 (m,  $J = 6.0, 2.9$  Hz, 2H), 3.69 (t,  $J = 6.5$  Hz, 1H), 3.52 (dd,  $J = 13.7, 12.1$  Hz, 1H), 2.70 (m,  $J = 12.1, 5.3, 3.8$  Hz, 1H), 2.38 (s, 3H), 1.26 (t,  $J = 7.1$  Hz, 3H). **<sup>13</sup>C NMR** (100 MHz, CDCl<sub>3</sub>)  $\delta$  = 170.83, 144.00, 136.46, 135.94, 135.88, 130.43, 129.74, 128.77, 127.52, 127.19, 124.42, 123.06, 118.46, 60.90, 43.43, 43.18, 41.37, 21.55, 14.24. **HRMS (ESI)** for C<sub>21</sub>H<sub>23</sub>NO<sub>4</sub>S [ $M + H$ ]<sup>+</sup>: calcd 386.1421, found 386.1417.

### 5.2 Synthesis of Product 6

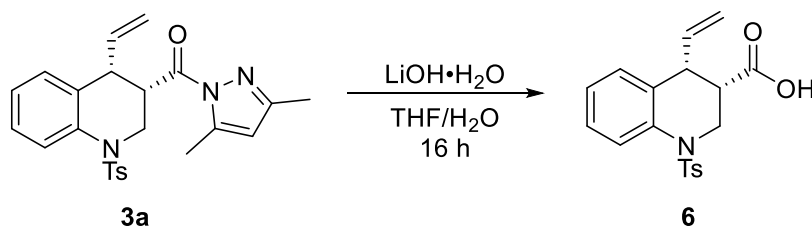

**Procedure F:** Compound **3a** (57.5 mg, 0.13 mmol) was dissolved into 1 mL THF/H<sub>2</sub>O (2:1)

in an oven-dried 10 mL flask containing a stir bar under Ar atmosphere. Then, LiOH·H<sub>2</sub>O (11.1 mg, 0.26 mmol) was added and the resulting solution was stirring at this temperature for 16 h. The reaction mixture was quenched with two drops of CH<sub>3</sub>COOH. Then the crude product was purified by flash column chromatography on silica gel (petrol ether/ EtOAc = 7/1 to 5/1) to give product **6**. The diastereomer ration (dr value) was determined by <sup>1</sup>H NMR of the reaction mixture.

### (3S,4R)-1-Tosyl-4-vinyl-1,2,3,4-tetrahydroquinoline-3-carboxylic acid **6**

Colourless oil, 94% yield.  $[\alpha]_{\text{D}}^{25} = 40.2$  ( $c = 1.00$  in CHCl<sub>3</sub>); dr >19:1, <sup>1</sup>H NMR (400 MHz, CDCl<sub>3</sub>)  $\delta = 7.91$  (d,  $J = 8.4$  Hz, 1H), 7.56 (d,  $J = 8.0$  Hz, 2H), 7.23 (d,  $J = 7.9$  Hz, 3H), 7.17 – 6.98 (m, 2H), 5.59 (m,  $J = 17.3, 10.1, 7.6$  Hz, 1H), 4.99 (d,  $J = 10.1$  Hz, 1H), 4.74 (d,  $J = 16.8$  Hz, 1H), 4.40 (dd,  $J = 13.7, 3.7$  Hz, 1H), 3.73 (t,  $J = 6.4$  Hz, 1H), 3.51 (dd,  $J = 13.6, 12.1$  Hz, 1H), 2.77 (m,  $J = 12.1, 4.4$  Hz, 1H), 2.39 (s, 3H). <sup>13</sup>C NMR (100 MHz, CDCl<sub>3</sub>)  $\delta = 176.5, 144.15, 136.09, 135.87, 135.81, 130.49, 129.81, 128.41, 127.69, 127.19, 124.56, 123.15, 119.08, 43.11, 42.77, 41.26, 21.58$ . HRMS (ESI) for C<sub>19</sub>H<sub>19</sub>NO<sub>4</sub>S [M + H]<sup>+</sup>: calcd 358.1107, found 358.1101.

## 5.3 Synthesis of Product 7

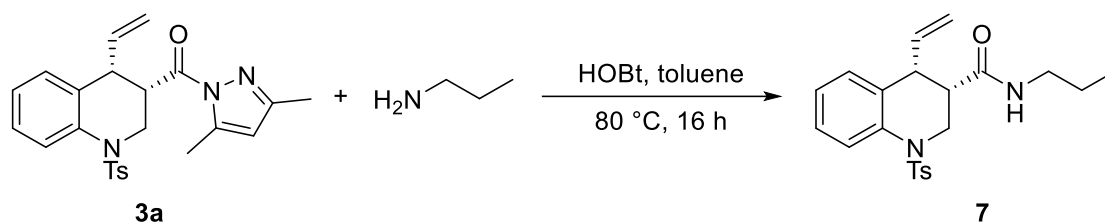

**Procedure G:** To a mixture of **3a** (43.5 mg, 0.1 mmol), n-propylamine (11.8 mg, 0.2 mmol) in PhMe (1.5 mL) was added 1-hydroxybenzotriazole (27.0 mg, 0.2 mmol). The reaction mixture was stirred for 16 h at 80 °C. Afterwards, the volatiles were removed by evaporation and the resulted material was purified by flash column chromatography on silica gel (petrol ether/ EtOAc = 3/1 to 1/1) to give product **8**. The diastereomer ration (dr value) was determined by <sup>1</sup>H NMR of the reaction mixture and the enantiomeric excess (ee value) of purified product was determined by chiral HPLC.

### (3S,4R)-N-Propyl-1-tosyl-4-vinyl-1,2,3,4-tetrahydroquinoline-3-carboxamide **7**

Colourless oil, 90% yield.  $[\alpha]_{\text{D}}^{25} = -0.7$  ( $c = 1.00$  in CHCl<sub>3</sub>); er = 95.5:4.5, dr >19:1, determined by HPLC analysis (Chiralpak AD column, hexane/i-PrOH, 80:20 v/v, flow rate 1 mL/min,  $\lambda =$

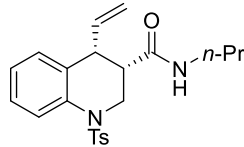
 254 nm, 25 °C),  $t_R$  (major) = 6.34 min,  $t_R$  (minor) = 6.94 min.  **$^1H$  NMR** (400 MHz,  $CDCl_3$ )  $\delta$  = 7.84 (d,  $J$  = 8.4 Hz, 1H), 7.58 (d,  $J$  = 8.0 Hz, 2H), 7.20 (dd,  $J$  = 13.9, 8.3 Hz, 3H), 7.07 – 6.95 (m, 2H), 5.74 (s, 1H), 5.60 (m,  $J$  = 17.2, 10.1, 7.5 Hz, 1H), 4.90 (d,  $J$  = 10.1 Hz, 1H), 4.60 (d,  $J$  = 16.9 Hz, 1H), 4.25 (dd,  $J$  = 13.3, 3.9 Hz, 1H), 3.65 – 3.47 (m, 2H), 3.19 (m,  $J$  = 27.1, 6.3 Hz, 2H), 2.60 (m,  $J$  = 11.9, 4.5 Hz, 1H), 2.38 (s, 3H), 1.49 (p,  $J$  = 7.1 Hz, 2H), 0.90 (t,  $J$  = 7.4 Hz, 3H).  **$^{13}C$  NMR** (100 MHz,  $CDCl_3$ )  $\delta$  = 170.36, 144.08, 136.41, 135.87, 135.72, 130.41, 129.78, 128.99, 127.49, 127.25, 124.31, 122.76, 118.12, 44.50, 43.86, 42.57, 41.19, 22.85, 21.60, 11.45. **HRMS (ESI)** for  $C_{22}H_{26}N_2O_3S$   $[M + H]^+$ : calcd 399.1737, found 399.1735.

#### 5.4 Synthesis of Product 8

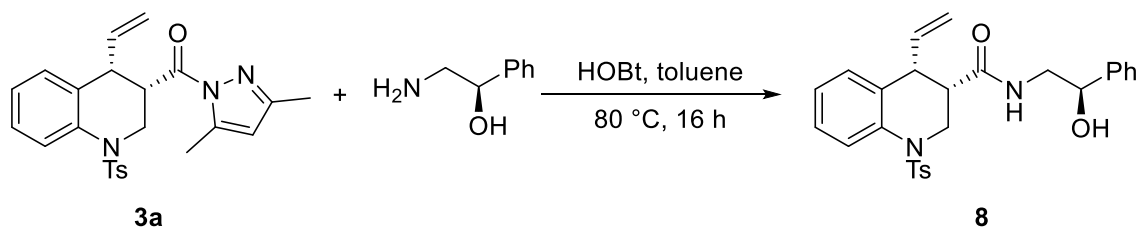

**Procedure H:** To a mixture of **3a** (43.5 mg, 0.1 mmol), (R)-(+)-2-Phenylglycinol (27.4 mg, 0.2 mmol) in PhMe (1.5 mL) was added 1-hydroxybenzotriazole (27.0 mg, 0.2 mmol). The reaction mixture was stirred for 16 h at 80 °C. Afterwards, the volatiles were removed by evaporation and the resulted material was purified by flash column chromatography on silica gel (petrol ether/ EtOAc = 3/1 to 1/1) to give product **8**. The diastereomer ratio (dr value) was determined by  $^1H$  NMR of the reaction mixture and the enantiomeric excess (ee value) of purified product was determined by chiral HPLC.

#### (3S,4R)-N-((R)-2-Hydroxy-2-phenylethyl)-1-tosyl-4-vinyl-1,2,3,4-tetrahydroquinoline-3-carboxamide **8**

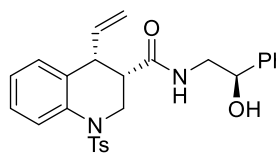
 Colourless oil, 76% yield.  $[\alpha]_D^{25} = 57$  ( $c$  = 1.00 in  $CHCl_3$ ); er = 95:5, dr >19:1, determined by HPLC analysis (Chiralpak OD column, hexane/i-PrOH, 90:10 v/v, flow rate 1 mL/min,  $\lambda$  = 254 nm, 25 °C),  $t_R$  (major) = 29.93 min,  $t_R$  (minor) = 62.94 min.  **$^1H$  NMR** (400 MHz,  $CDCl_3$ )  $\delta$  = 7.83 (d,  $J$  = 8.4 Hz, 1H), 7.61 – 7.51 (m, 2H), 7.36 (d,  $J$  = 4.5 Hz, 5H), 7.30 (t,  $J$  = 4.4 Hz, 1H), 7.21 (d,  $J$  = 8.1 Hz, 3H), 7.08 – 6.94 (m, 2H), 5.55 (m,  $J$  = 17.2, 10.0, 7.3 Hz, 1H), 4.86 (dd,  $J$  = 17.2, 9.2 Hz, 2H), 4.53 (d,  $J$  = 16.9 Hz, 1H), 4.25 (dd,  $J$  = 13.3, 3.6 Hz, 1H), 3.69 (m,  $J$  = 14.3, 6.8, 3.3 Hz,

1H), 3.54 (d,  $J = 12.2$  Hz, 1H), 3.49 (t,  $J = 6.4$  Hz, 1H), 3.38 – 3.24 (m, 2H), 2.63 (m,  $J = 11.9$ , 4.5 Hz, 1H), 2.38 (s, 3H).  $^{13}\text{C}$  NMR (100 MHz,  $\text{CDCl}_3$ )  $\delta = 171.59, 144.14, 141.49, 136.34, 135.85, 135.69, 130.37, 129.80, 128.80, 128.63, 127.99, 127.57, 127.25, 125.79, 124.34, 122.69, 118.34, 73.38, 47.17, 44.38, 43.86, 42.69, 21.60$ . HRMS (ESI) for  $\text{C}_{27}\text{H}_{28}\text{N}_2\text{O}_4\text{S}$  [ $\text{M} + \text{H}$ ] $^+$ : calcd 477.1843, found 477.1850.

## 5.5 Synthesis of Product 9

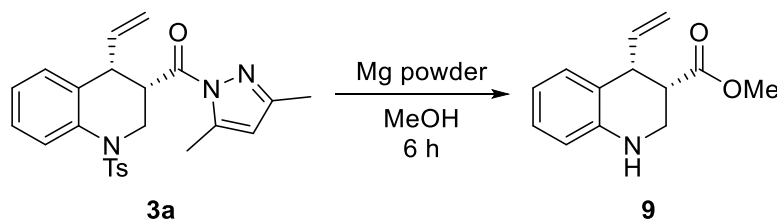

**Procedure I:** To a mixture of **3a** (43.6 mg, 0.10 mmol) in MeOH (2.0 mL) was added Mg powder (180.0 mg, 7.5 mmol). The reaction mixture was stirred for 6 h at 60 °C. Afterwards, the mixture was quenched with 0.5 mL aqueous  $\text{NH}_4\text{Cl}$  and extracted with EtOAc (2 x 5 mL). The combined EtOAc layers were dried over anhydrous sodium sulfate, filtered and concentrated under reduced pressure. Purification of the crude product was performed with flash column chromatography on silica gel (petrol ether/ EtOAc = 10/1 to 8/1) to give product **9**. The diastereomer ratio (dr value) was determined by  $^1\text{H}$  NMR of the reaction mixture and the enantiomeric excess (ee value) of purified product was determined by chiral HPLC.

### Methyl (3S,4R)-4-vinyl-1,2,3,4-tetrahydroquinoline-3-carboxylate **9**

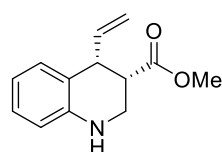

Colourless oil, 83% yield.  $[\alpha]_{\text{D}}^{25} = -36.1$  ( $c = 1.00$  in  $\text{CHCl}_3$ ); er = 95.5:4.5, dr = 5:1, determined by HPLC analysis (Chiralpak AD column, hexane/ $i$ -PrOH, 99:1 v/v, flow rate 1 mL/min,  $\lambda = 254$  nm, 25 °C),  $t_{\text{R}}$  (minor) = 29.64 min,  $t_{\text{R}}$  (major) = 44.40 min.  $^1\text{H}$  NMR (400 MHz,  $\text{CDCl}_3$ )  $\delta = 7.05 - 6.91$  (m, 2H, major), 6.64 (t,  $J = 7.5$  Hz, 1H, major), 6.53 (d,  $J = 8.0$  Hz, 1H, major), 5.86 (m,  $J = 17.3, 10.2, 7.7$  Hz, 1H, major), 5.76 (dd,  $J = 17.7, 9.3$  Hz, 1H, minor), 5.25 – 5.12 (m, 2H, minor), 5.13 – 5.08 (m, 1H, major), 4.94 (m,  $J = 16.9, 1.5$  Hz, 1H, major), 3.96 – 3.83 (m, 2H, major), 3.79 (m,  $J = 8.2$  Hz, 1H, minor), 3.73 (s, 3H, major), 3.44 (d,  $J = 8.4$  Hz, 2H, major), 3.09 – 2.97 (m, 1H, major).  $^{13}\text{C}$  NMR (100 MHz,  $\text{CDCl}_3$ )  $\delta = 172.75, 143.45, 138.35, 130.40, 127.74, 120.87, 117.46, 117.19, 114.23, 51.66, 43.32, 42.26, 38.60$ . HRMS (ESI) for  $\text{C}_{13}\text{H}_{15}\text{NO}_2$  [ $\text{M} + \text{H}$ ] $^+$ : calcd 218.1176, found 218.1183.

## 5.6 Synthesis of Product 10

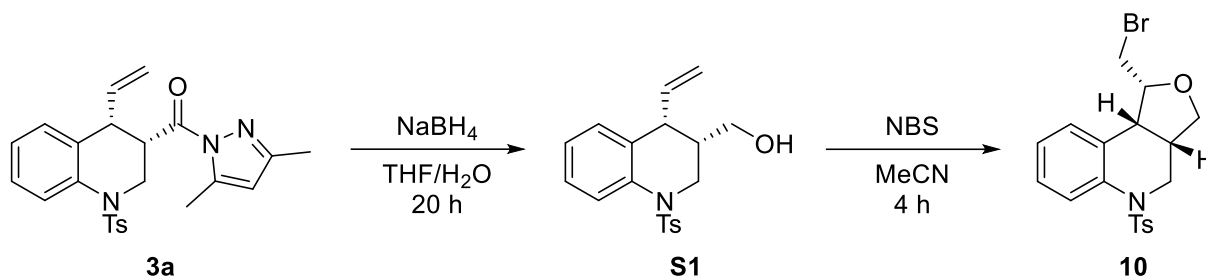

**Procedure J:** To a mixture of **3a** (74.3 mg, 0.17 mmol) in THF/H<sub>2</sub>O (4:1, 1.7 mL) was added NaBH<sub>4</sub> (66.0 mg, 1.74 mmol) in one portion. The reaction mixture was stirred for 20 h at room temperature. Afterwards, the reaction mixture was quenched with 1.3 mL HCl (2 N) and extracted with DCM (2 x 5 mL). The combined organic phase was dried over anhydrous sodium sulfate, filtered and concentrated under reduced pressure. The resulted material was purified by flash column chromatography on silica gel (petrol ether/ EtOAc = 5/1 to 1/1) to give product **S1**. The diastereomer ration (dr value) was determined by <sup>1</sup>H NMR of the reaction mixture and the enantiomeric excess (ee value) of purified product was determined by chiral HPLC.

To a mixture of **S1** (34.3 mg, 0.10 mmol) in MeCN (2.0 mL) was added NBS (19.6 mg, 0.11 mmol). The reaction mixture was stirred for 4 h at room temperature. Afterwards, the mixture was poured into 10% Na<sub>2</sub>S<sub>2</sub>O<sub>3</sub> solution (5 mL) and extracted with EtOAc (2 x 5 mL). The combined EtOAc layers were washed with saturated aqueous KHCO<sub>3</sub> solution (5 mL) and brine (5 mL), dried over anhydrous sodium sulfate, filtered and concentrated under reduced pressure. Purification of the crude product was performed with flash column chromatography on silica gel (petrol ether/ EtOAc = 15/1 to 10/1) to give product **10**. The diastereomer ration (dr value) was determined by <sup>1</sup>H NMR of the reaction mixture and the enantiomeric excess (ee value) of purified product was determined by chiral HPLC.

### ((3S,4R)-1-Tosyl-4-vinyl-1,2,3,4-tetrahydroquinolin-3-yl)methanol **S1**

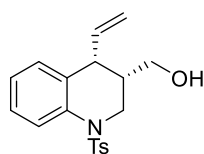

Colourless oil, 83% yield.  $[\alpha]_D^{25} = -28.1$  ( $c = 1.00$  in CHCl<sub>3</sub>); er = 96.5:3.5, dr >19:1, determined by HPLC analysis (Chiralpak AD column, hexane/*i*-PrOH, 95:5 v/v, flow rate 1 mL/min,  $\lambda = 254$  nm, 25 °C),  $t_R$  (minor) = 61.59 min,  $t_R$  (major) = 69.43 min. **<sup>1</sup>H NMR** (400 MHz, CDCl<sub>3</sub>)  $\delta$  = 7.86 (d,  $J = 8.4$  Hz, 1H), 7.57 (d,  $J = 8.2$  Hz, 2H), 7.25 – 7.13 (m, 3H), 7.07 – 6.94 (m, 2H), 5.47 (m,  $J = 16.9, 10.1, 8.6$  Hz, 1H),

4.97 (dd,  $J = 10.1, 1.6$  Hz, 1H), 4.85 (m,  $J = 16.9, 1.2$  Hz, 1H), 4.12 (dd,  $J = 12.9, 3.7$  Hz, 1H), 3.65 – 3.49 (m, 2H), 3.46 – 3.32 (m, 2H), 2.38 (s, 3H), 2.04 – 1.93 (m, 1H), 1.79 (d,  $J = 5.0$  Hz, 1H).  $^{13}\text{C}$  NMR (100 MHz,  $\text{CDCl}_3$ )  $\delta = 143.89, 136.81, 136.23, 136.10, 130.31, 129.98, 129.70, 127.28, 127.16, 124.26, 122.58, 117.72, 62.13, 45.38, 43.88, 38.36, 21.57$ . HRMS (ESI) for  $\text{C}_{19}\text{H}_{21}\text{NO}_3\text{S}$   $[\text{M} + \text{H}]^+$ : calcd 344.1315, found 344.1318.

**(1S,3aS,9bR)-1-(bromomethyl)-5-tosyl-1,3,3a,4,5,9b-hexahydrofuro[3,4-c]quinoline 10**

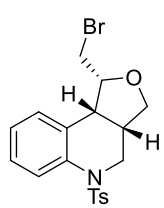

Colourless oil, 68% yield.  $[\alpha]_{\text{D}}^{25} = -88.1$  ( $c = 1.00$  in  $\text{CHCl}_3$ ); er = 96.5:3.5, dr >19:1, determined by HPLC analysis (Chiralpak AD column, hexane/*i*-PrOH, 95:5 v/v, flow rate 1 mL/min,  $\lambda = 254$  nm, 25 °C),  $t_{\text{R}}$  (major) = 36.71 min,  $t_{\text{R}}$  (minor) = 41.76 min.  $^1\text{H}$  NMR (400 MHz,  $\text{CDCl}_3$ )  $\delta = 7.91$  (d,  $J = 8.4$  Hz, 1H), 7.55 (d,  $J = 8.2$  Hz, 2H), 7.21 (dd,  $J = 8.4, 2.2$  Hz, 3H), 7.11 – 6.95 (m, 2H), 5.53 (m,  $J = 17.4, 10.1, 7.7$  Hz, 1H), 4.94 (d,  $J = 10.1$  Hz, 1H), 4.70 (d,  $J = 16.9$  Hz, 1H), 4.47 – 4.31 (m, 1H), 3.69 (m, 4H), 3.52 (dd,  $J = 13.7, 12.2$  Hz, 1H), 2.73 (m,  $J = 12.2, 5.4, 3.7$  Hz, 1H), 2.38 (s, 3H).  $^{13}\text{C}$  NMR (100 MHz,  $\text{CDCl}_3$ )  $\delta = 171.29, 144.04, 136.57, 135.92, 135.84, 130.49, 129.77, 128.67, 127.57, 127.18, 124.49, 123.12, 118.48, 51.94, 43.35, 43.10, 41.39, 21.58$ . HRMS (ESI) for  $\text{C}_{19}\text{H}_{20}\text{BrNO}_3\text{S}$   $[\text{M} + \text{Na}]^+$ : calcd 422.0420, found 422.0415.

**6. X-ray Crystal Structure Determination of Product 3a**

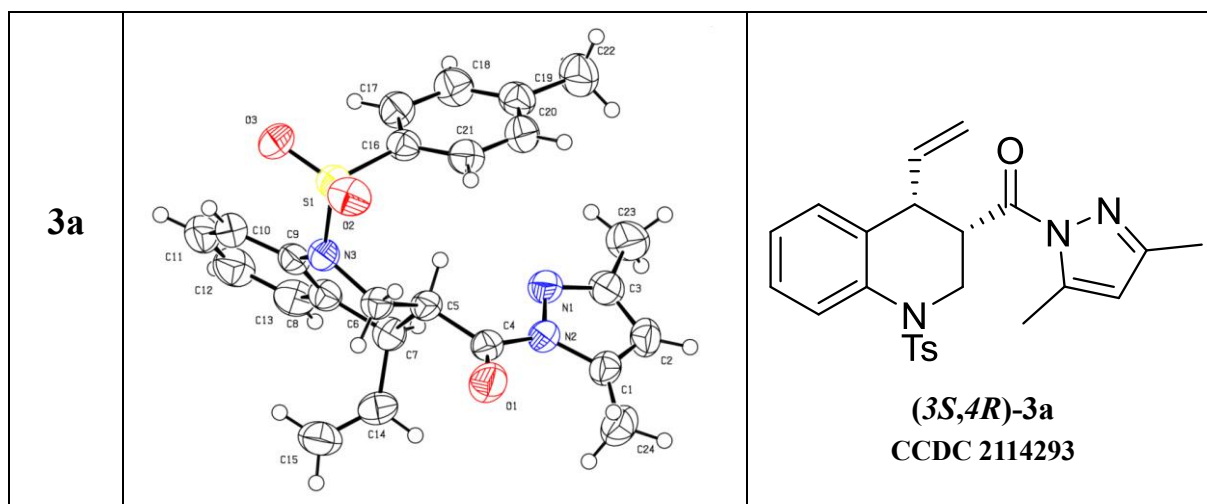

## 7. Copy of the NOESY Spectroscopy of Product 10 and 3n

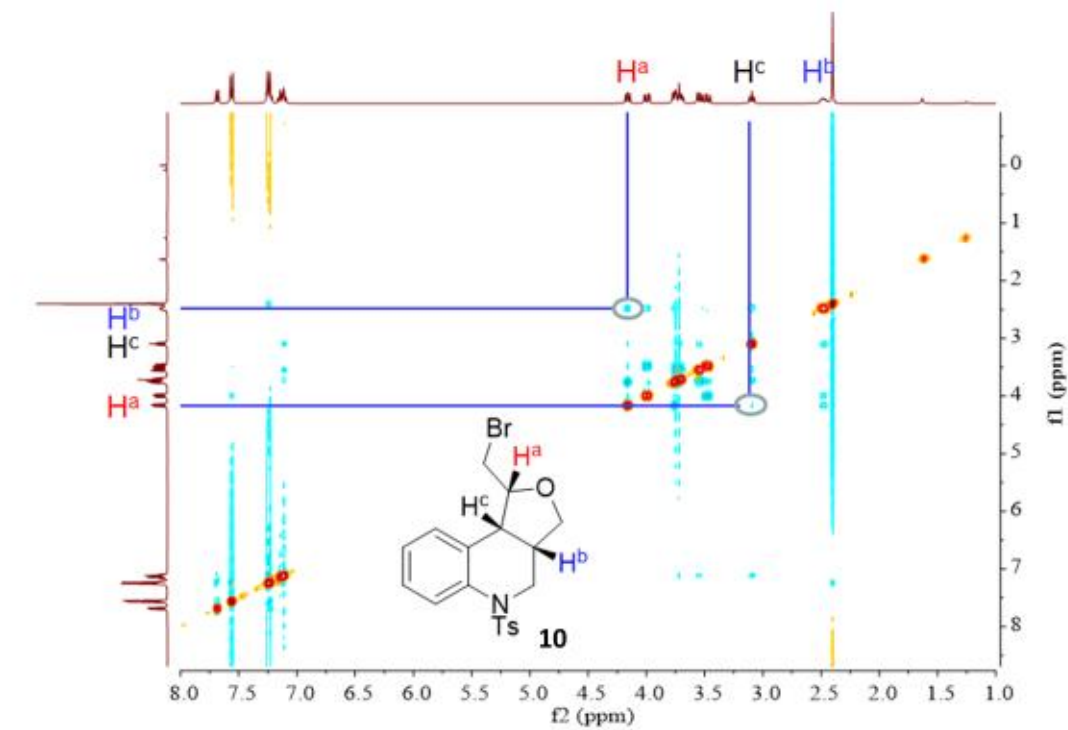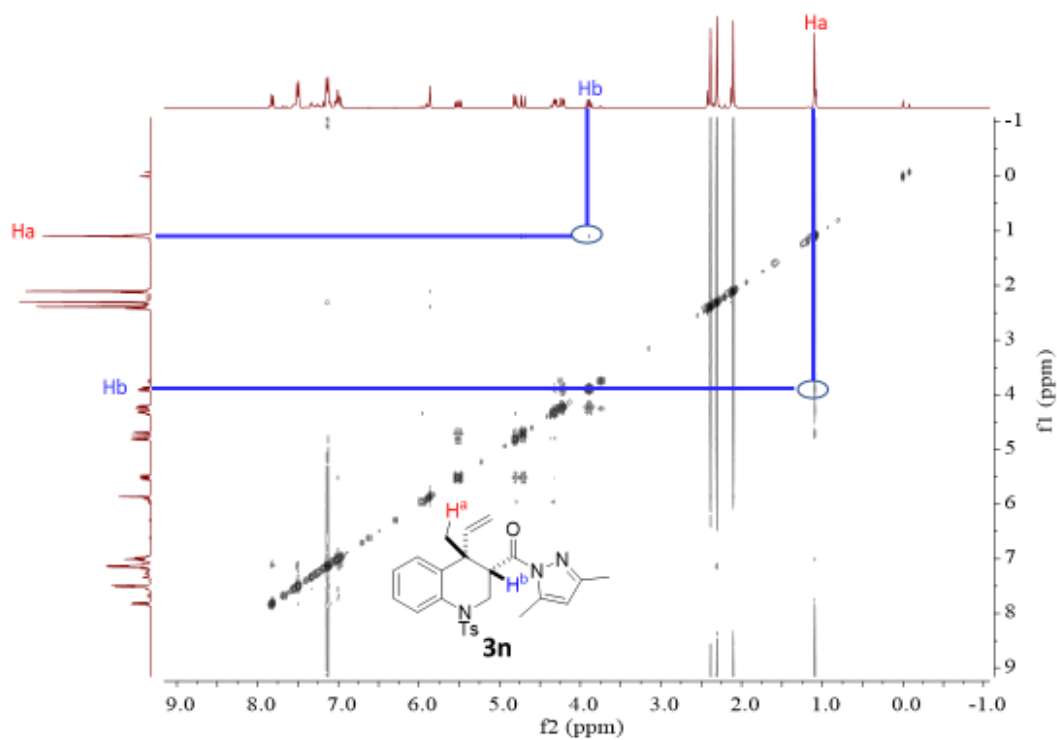

## 8. Copies of $^1\text{H}$ NMR, $^{13}\text{C}$ NMR and $^{19}\text{F}$ NMR Spectra

$^1\text{H}$  NMR (400 MHz,  $\text{CDCl}_3$ ) spectrum of product **3a**

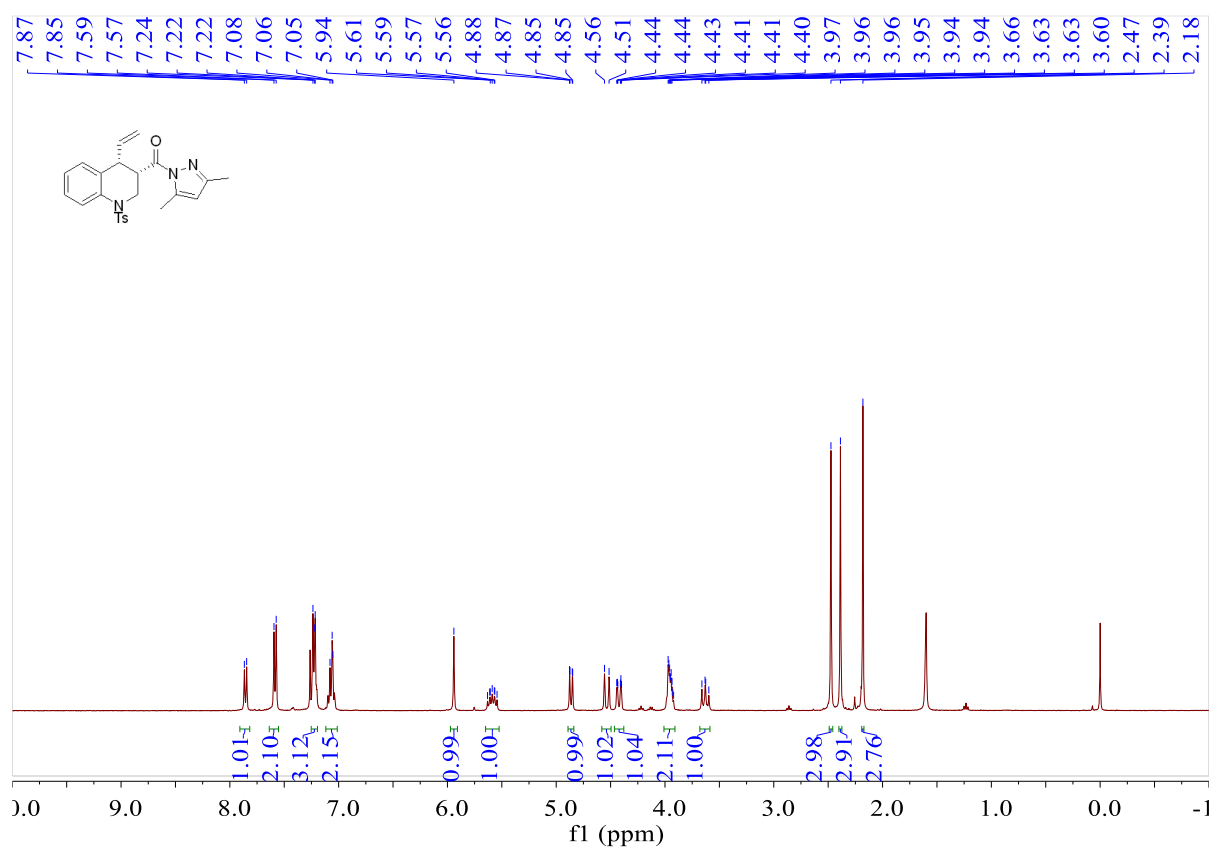

$^{13}\text{C}$  NMR (100 MHz,  $\text{CDCl}_3$ ) spectrum of product **3a**

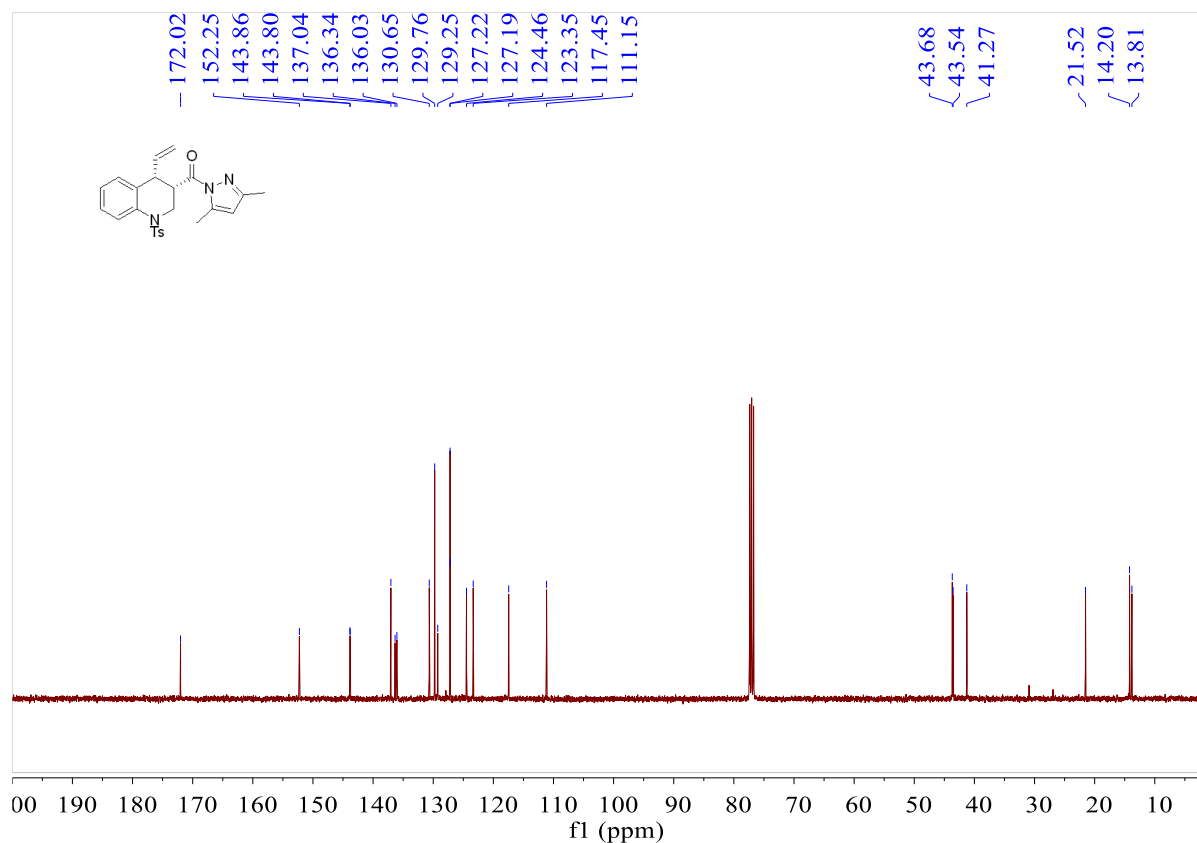

$^1\text{H}$  NMR (400 MHz,  $\text{CDCl}_3$ ) of product **3b**

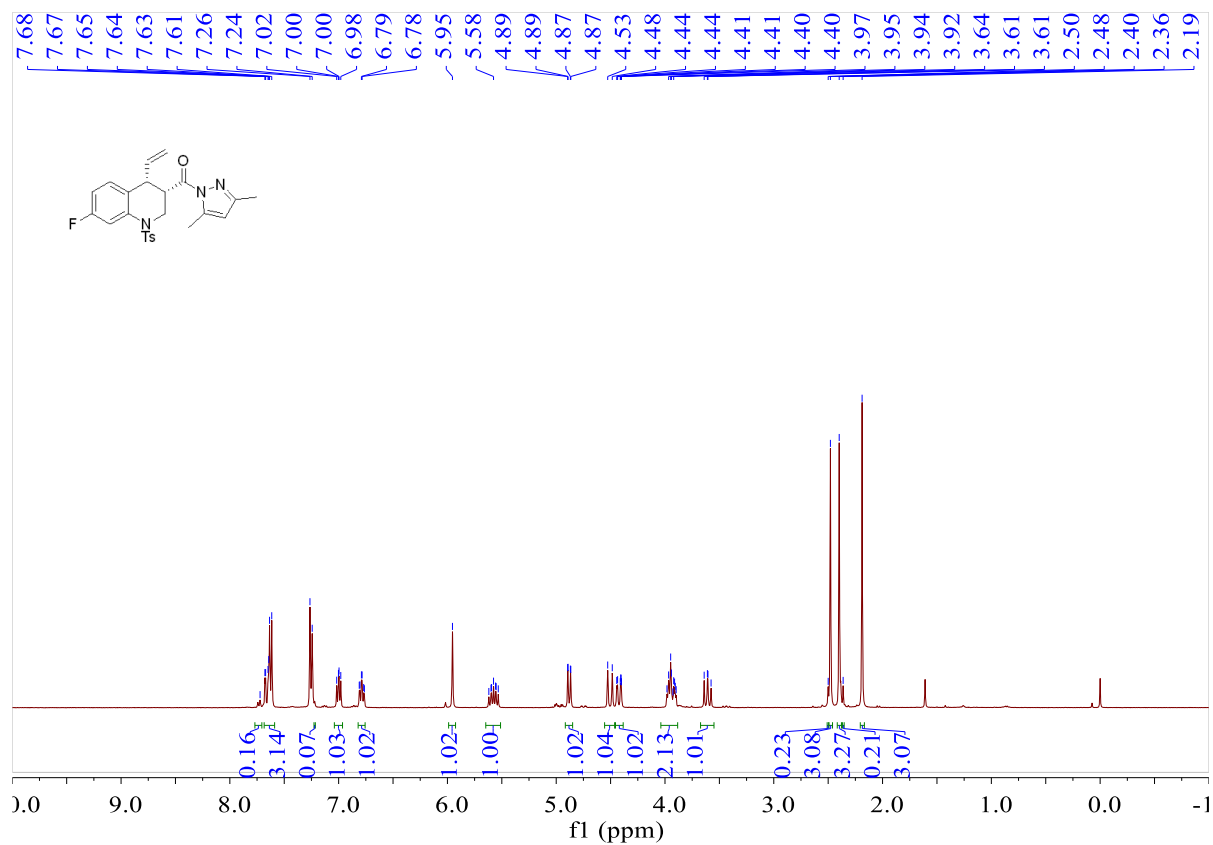

$^{13}\text{C}$  NMR (100 MHz,  $\text{CDCl}_3$ ) of product **3b**

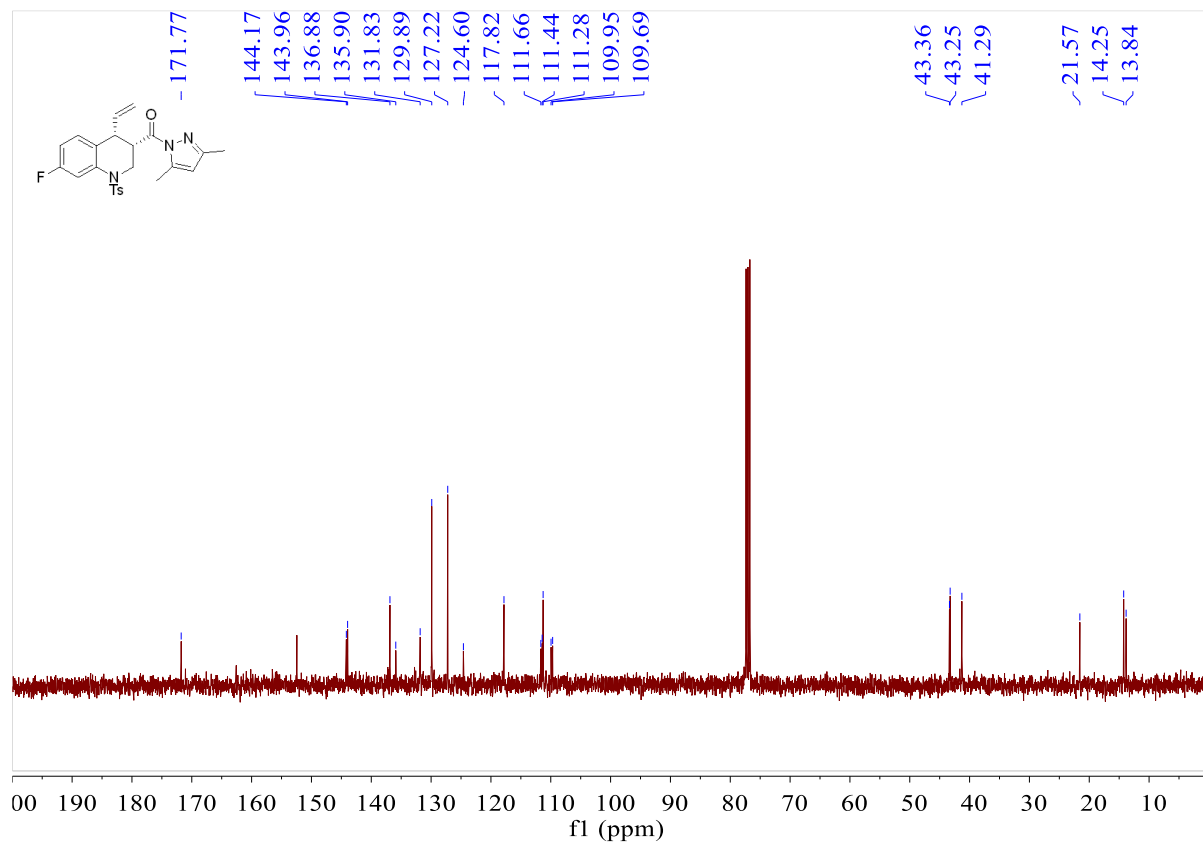

$^{19}\text{F}$  NMR (376 MHz,  $\text{CDCl}_3$ ) of product **3b**

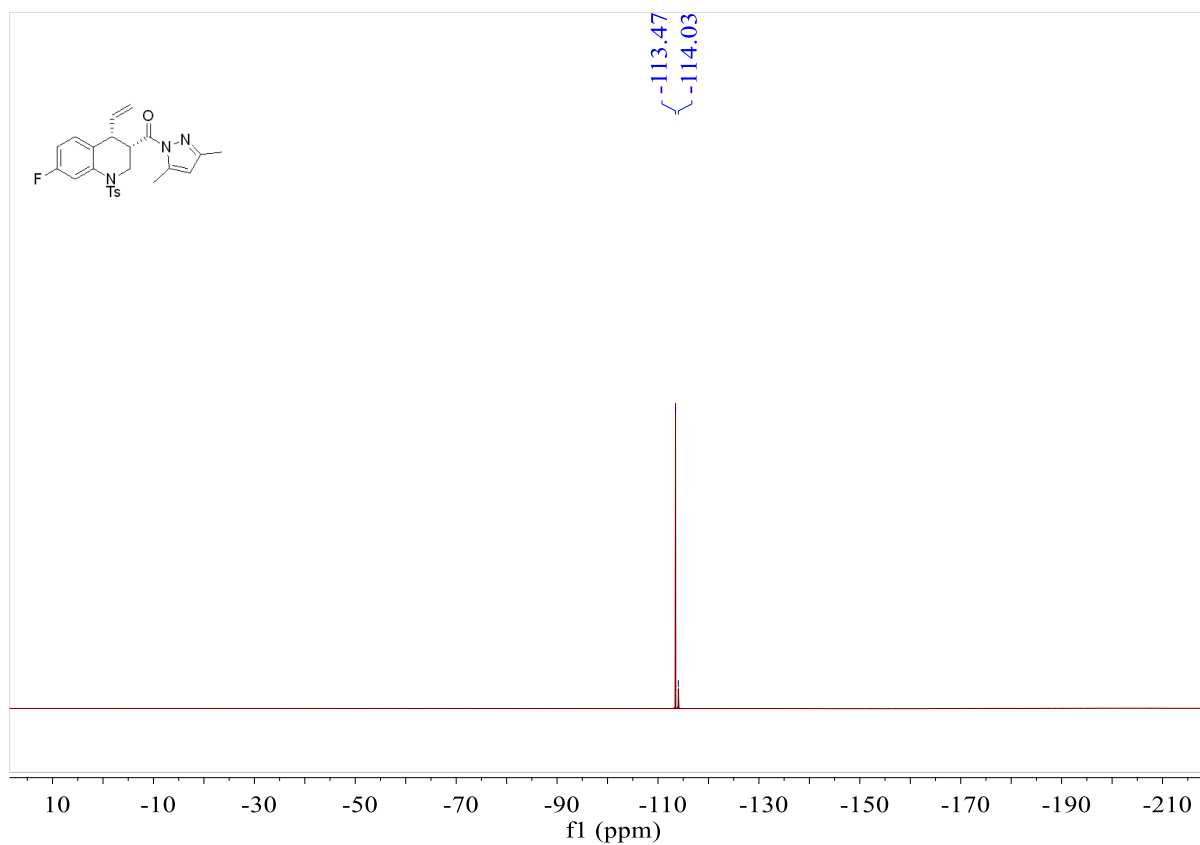

$^1\text{H}$  NMR (400 MHz,  $\text{CDCl}_3$ ) of product **3c**

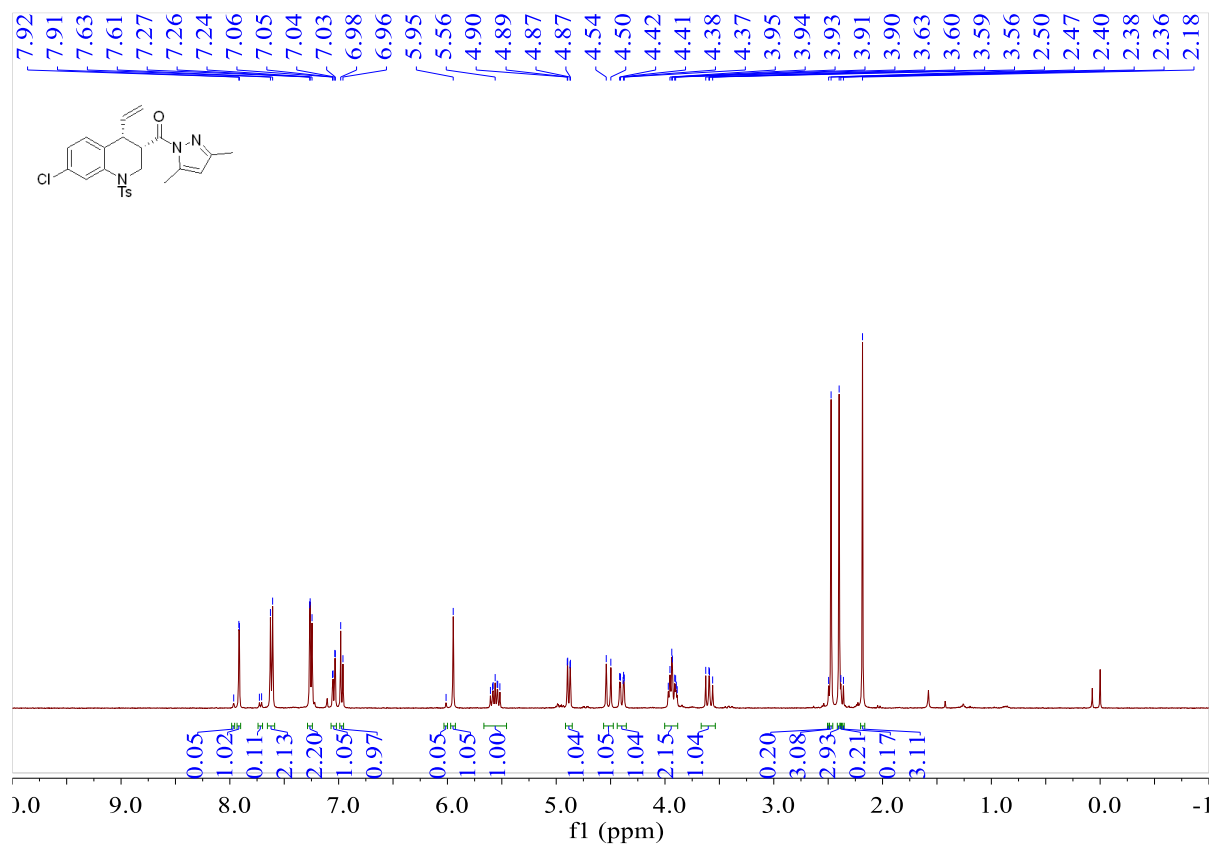

$^{13}\text{C}$  NMR (100 MHz,  $\text{CDCl}_3$ ) of product **3c**

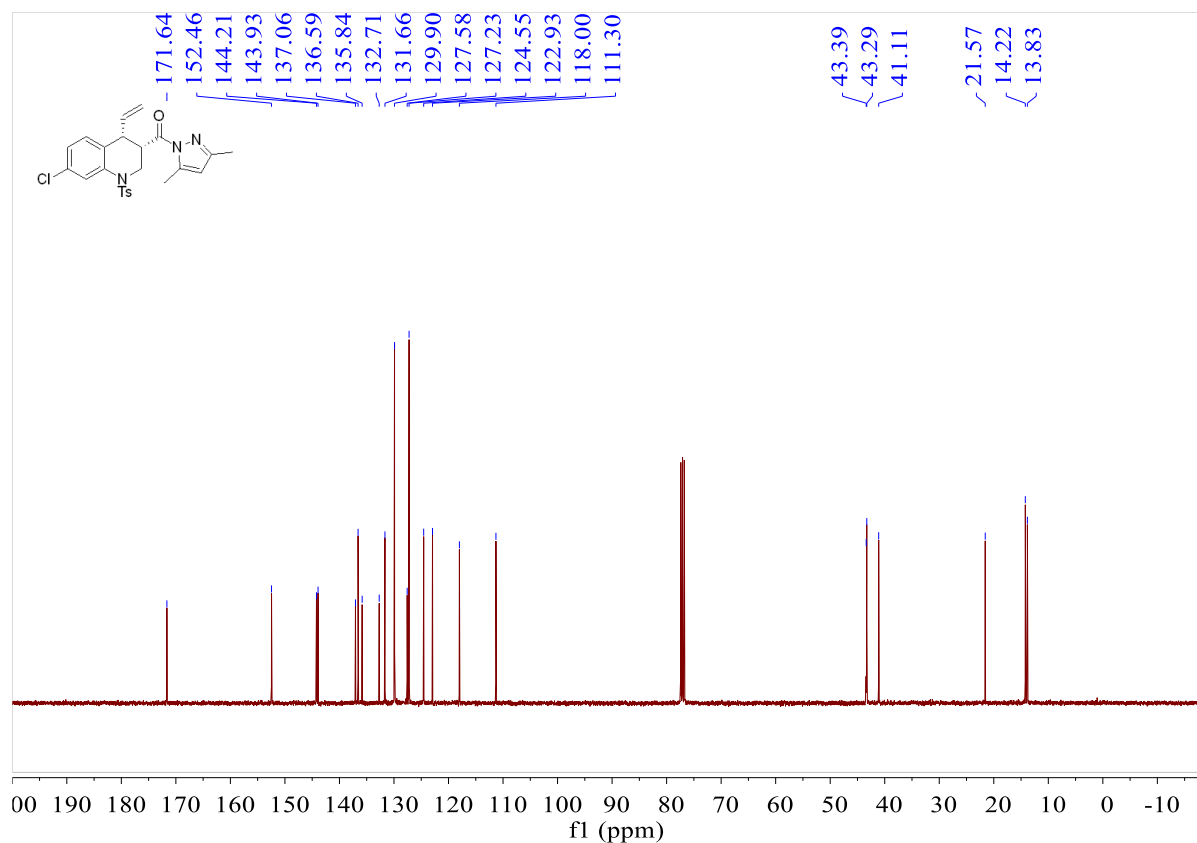

$^1\text{H}$  NMR (400 MHz,  $\text{CDCl}_3$ ) of product **3d**

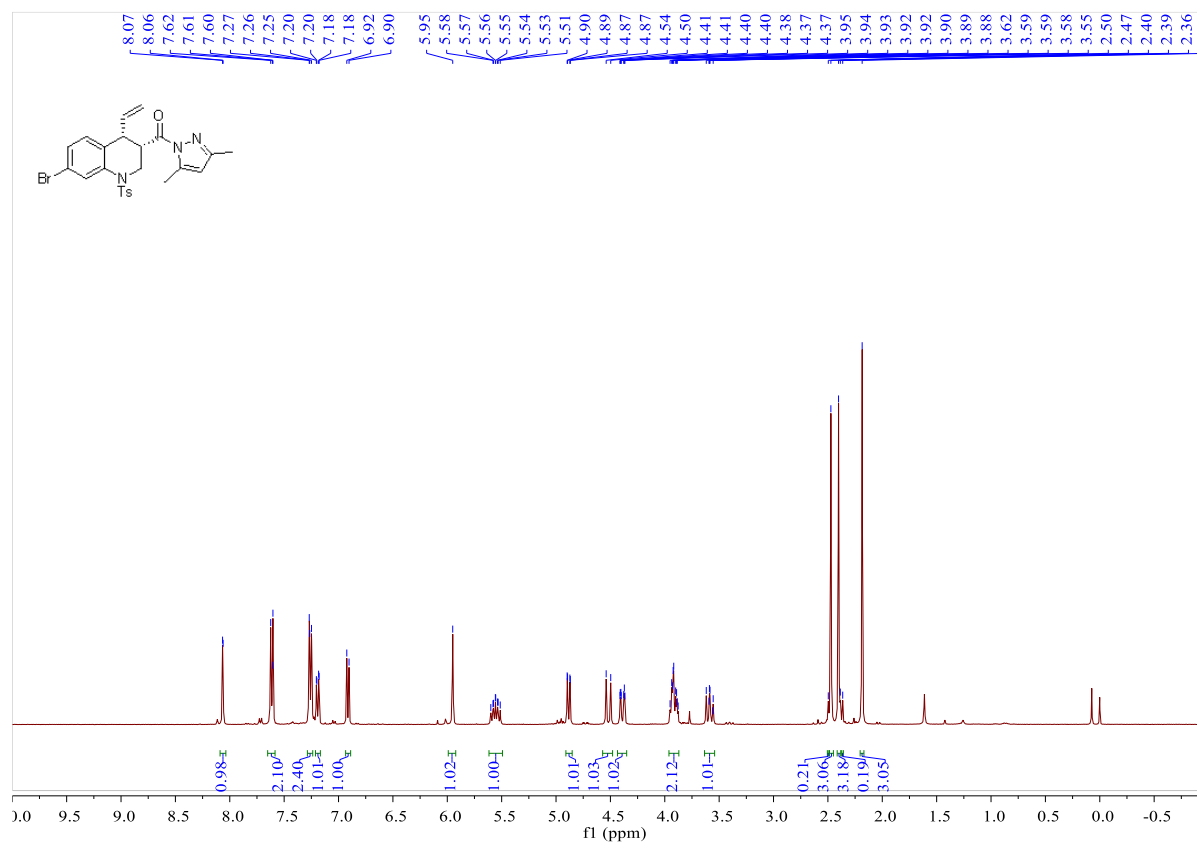

$^{13}\text{C}$  NMR (100 MHz,  $\text{CDCl}_3$ ) of product **3d**

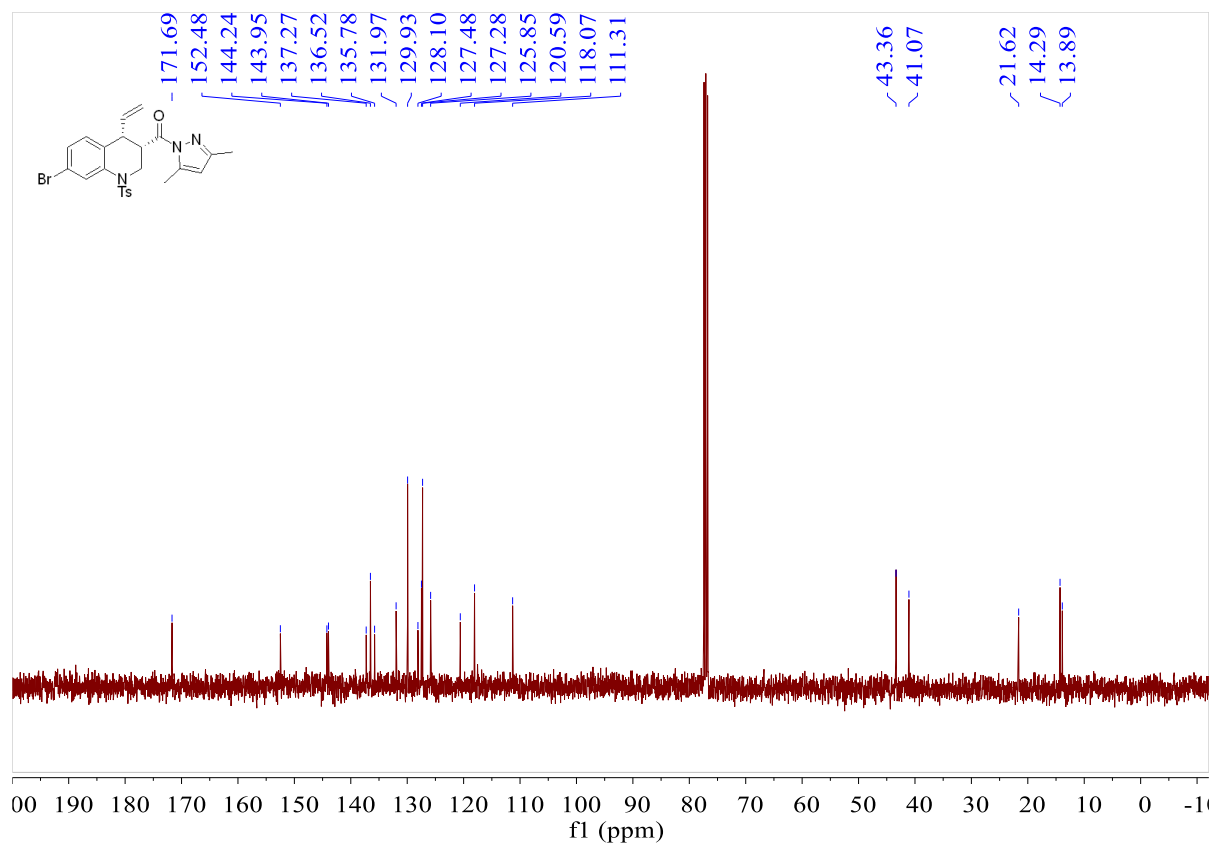

$^1\text{H}$  NMR (400 MHz,  $\text{CDCl}_3$ ) of product **3e**

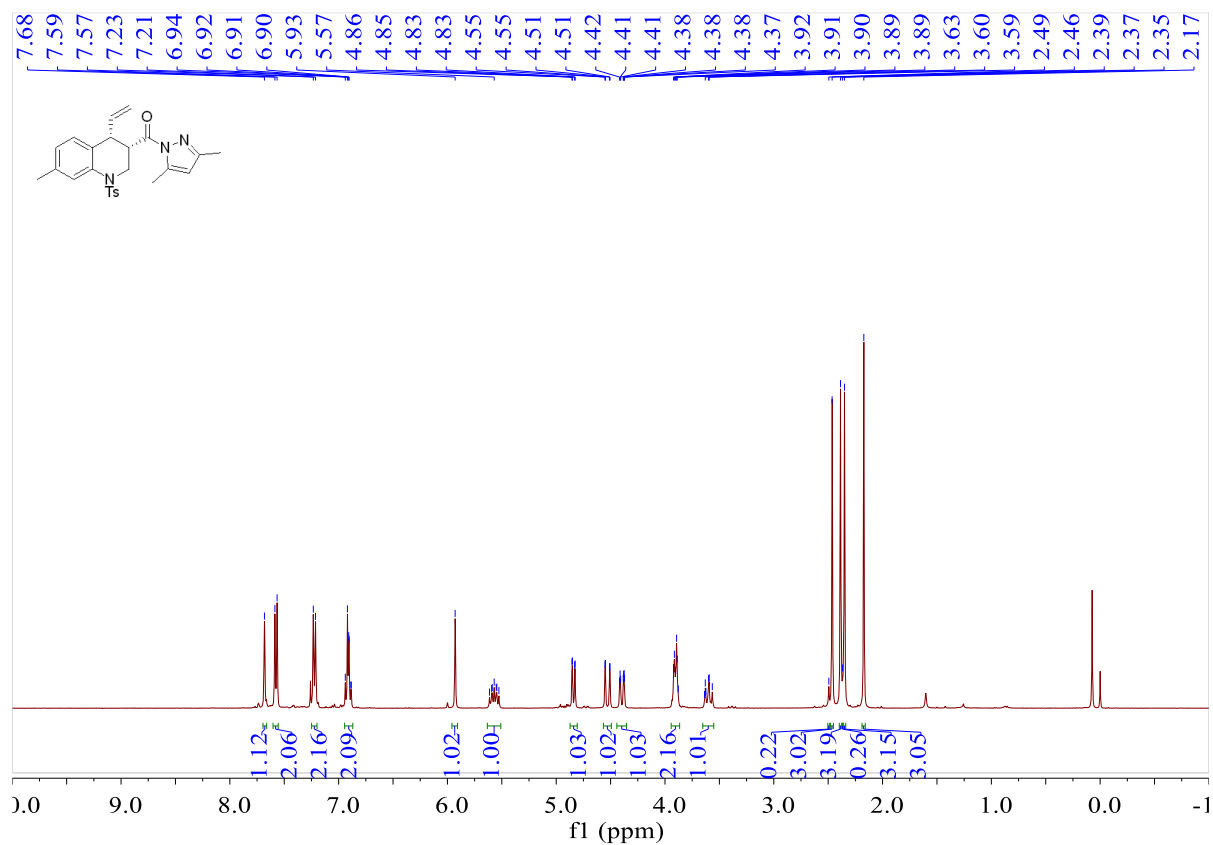

$^{13}\text{C}$  NMR (100 MHz,  $\text{CDCl}_3$ ) of product **3e**

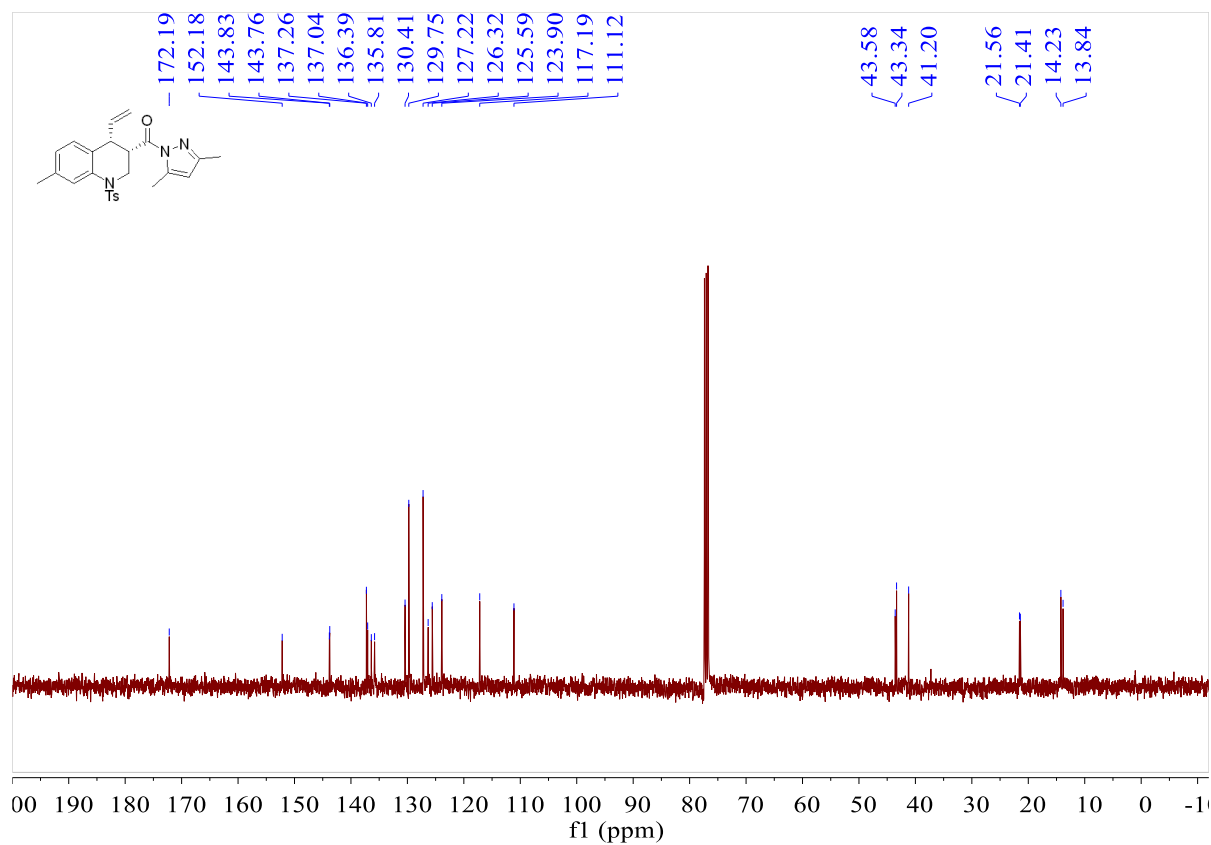

$^1\text{H}$  NMR (400 MHz,  $\text{CDCl}_3$ ) of product **3f**

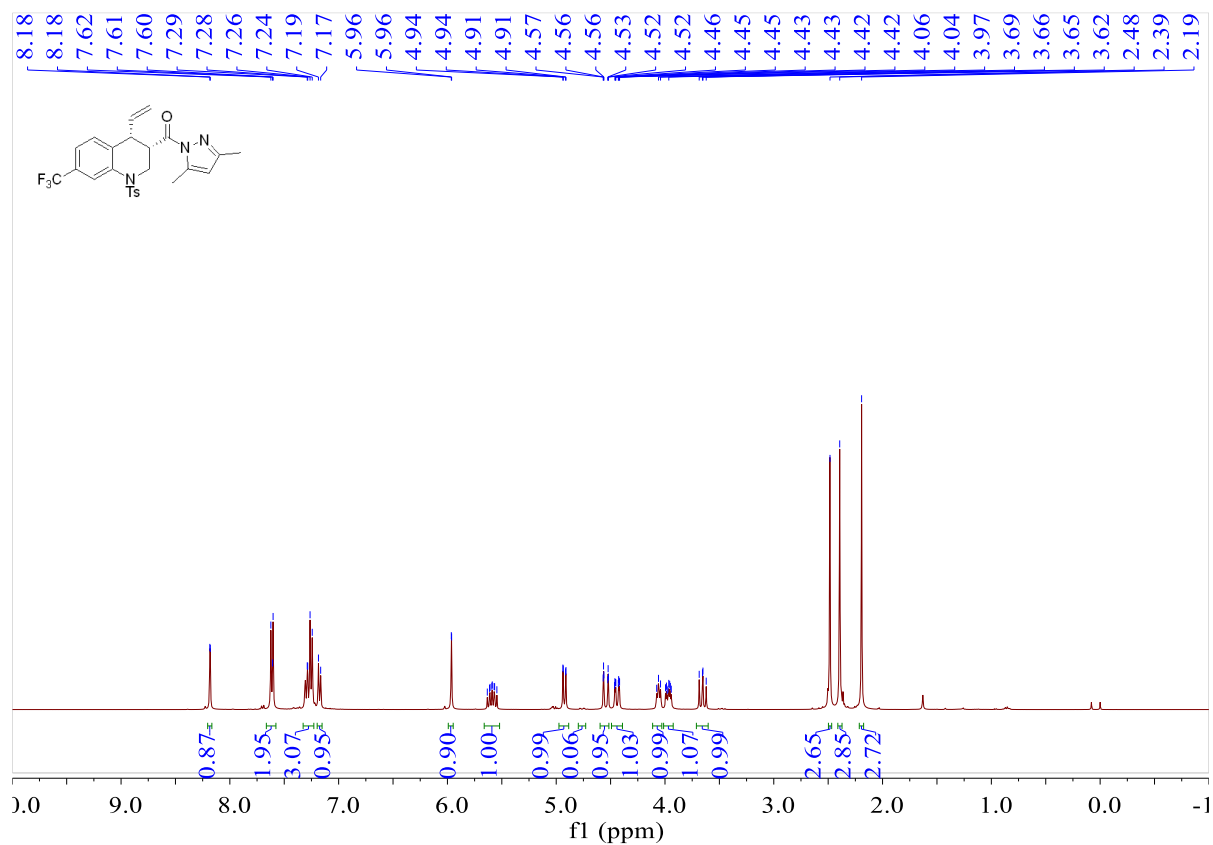

$^{13}\text{C}$  NMR (100 MHz,  $\text{CDCl}_3$ ) of product **3f**

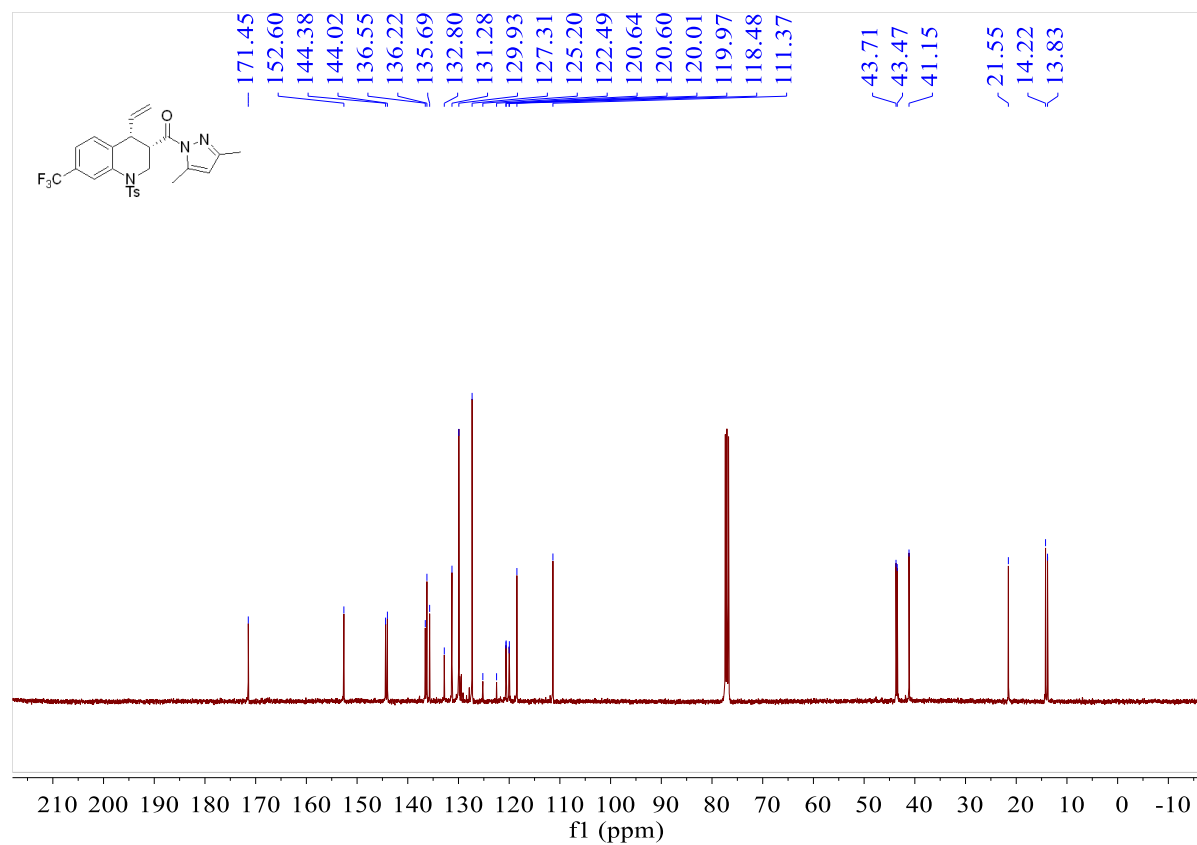

$^{19}\text{F}$  NMR (376 MHz,  $\text{CDCl}_3$ ) of product **3f**

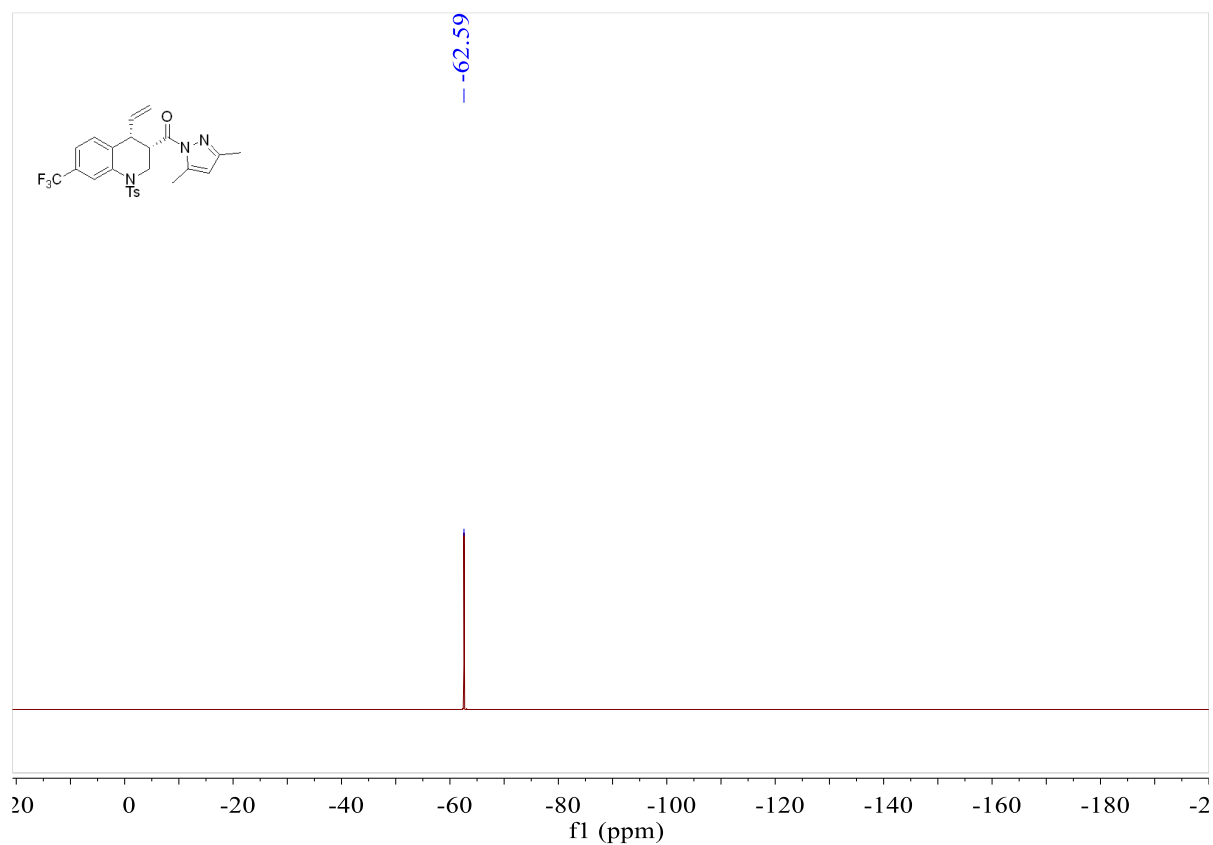

$^1\text{H}$  NMR (400 MHz,  $\text{CDCl}_3$ ) of product **3g**

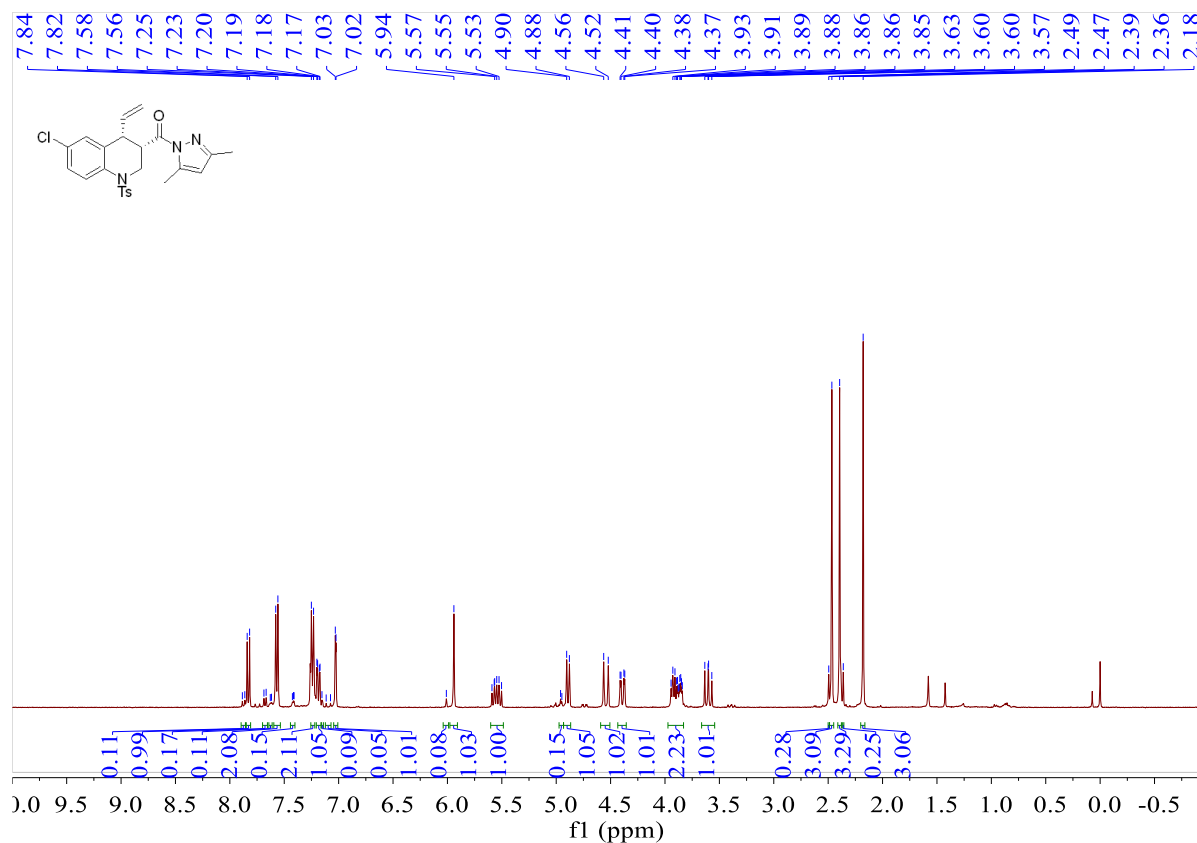

$^{13}\text{C}$  NMR (100 MHz,  $\text{CDCl}_3$ ) of product **3g**

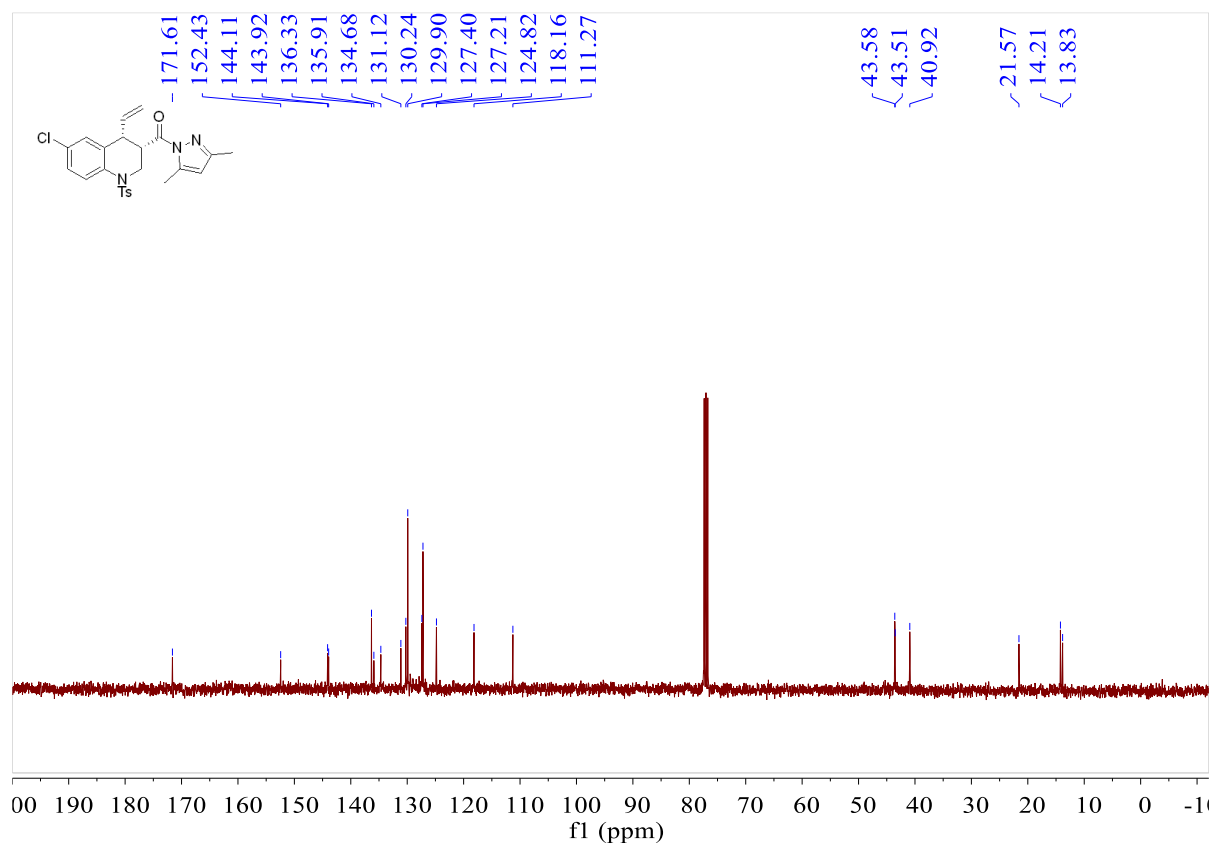

$^1\text{H}$  NMR (400 MHz,  $\text{CDCl}_3$ ) of product **3h**

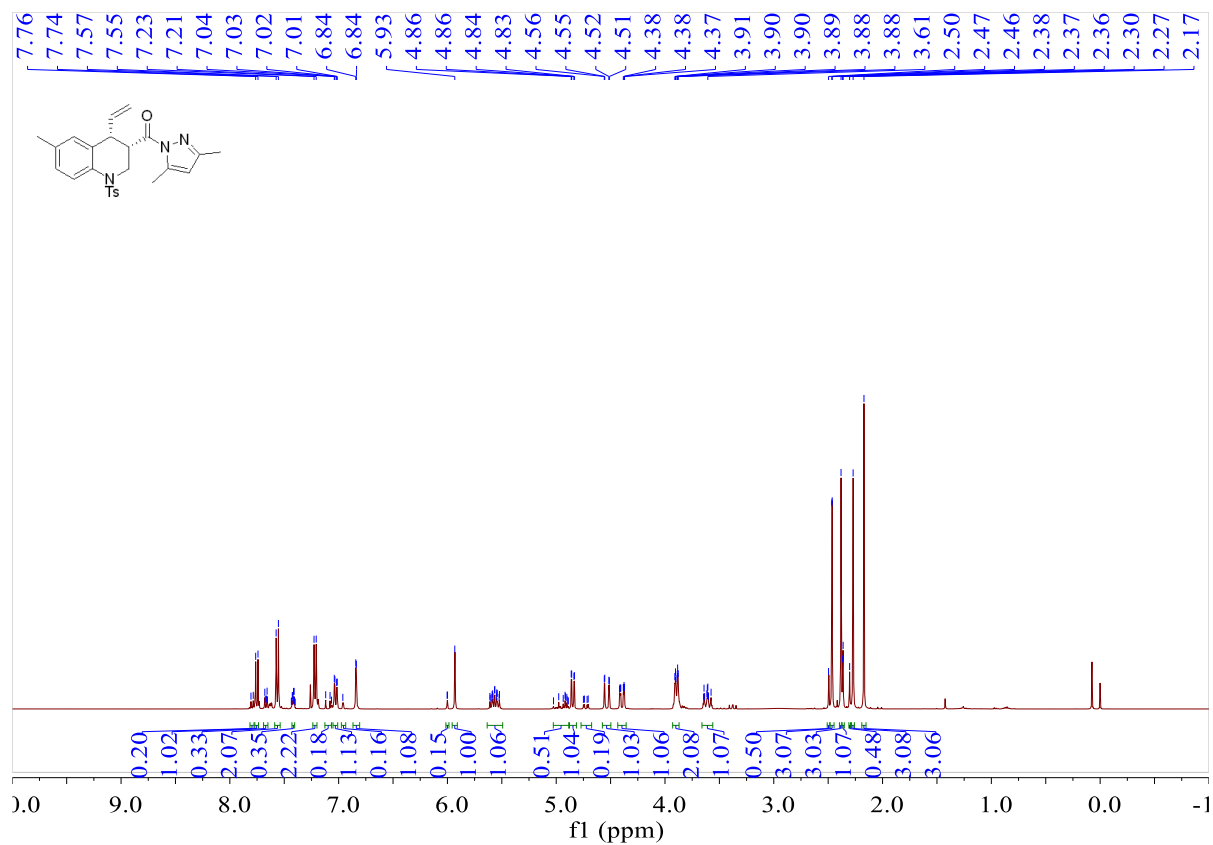

$^{13}\text{C}$  NMR (100 MHz,  $\text{CDCl}_3$ ) of product **3h**

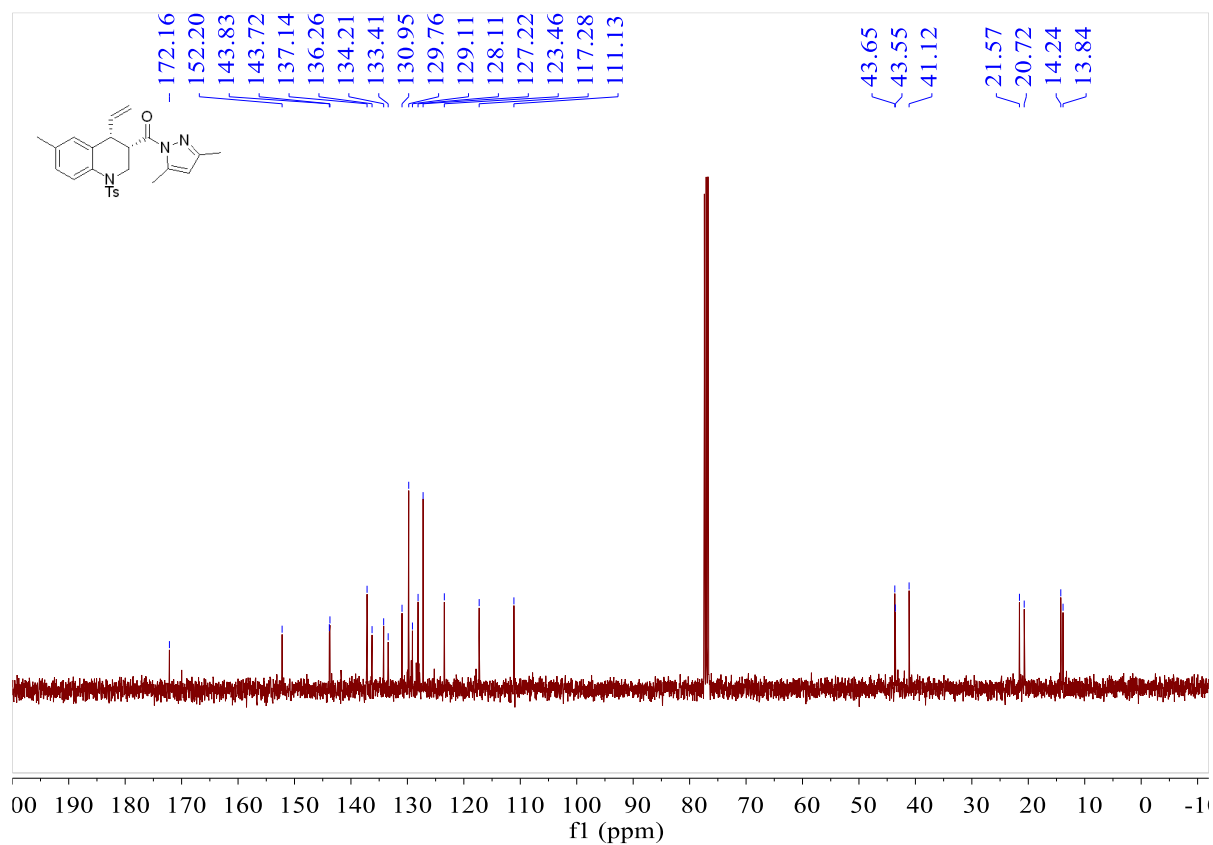

$^1\text{H}$  NMR (400 MHz,  $\text{CDCl}_3$ ) of product **3i**

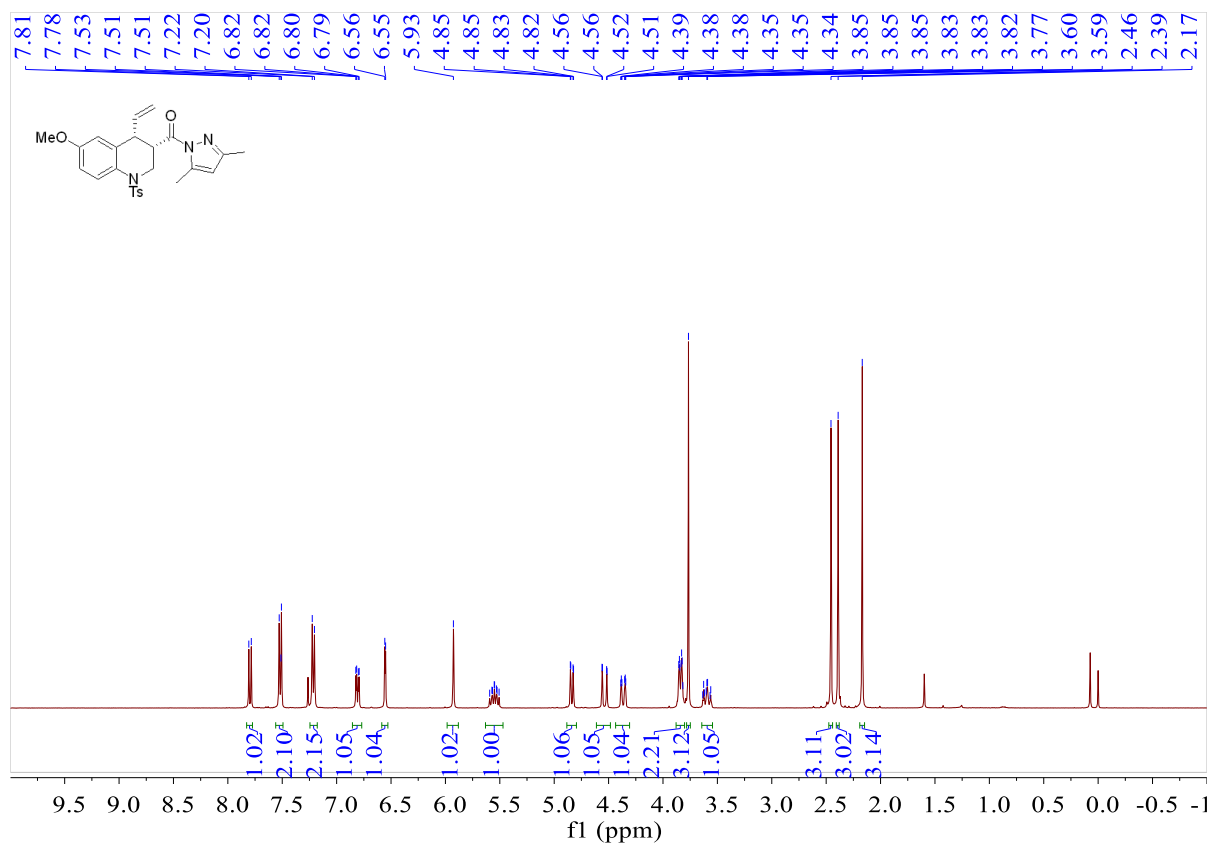

$^{13}\text{C}$  NMR (100 MHz,  $\text{CDCl}_3$ ) of product **3i**

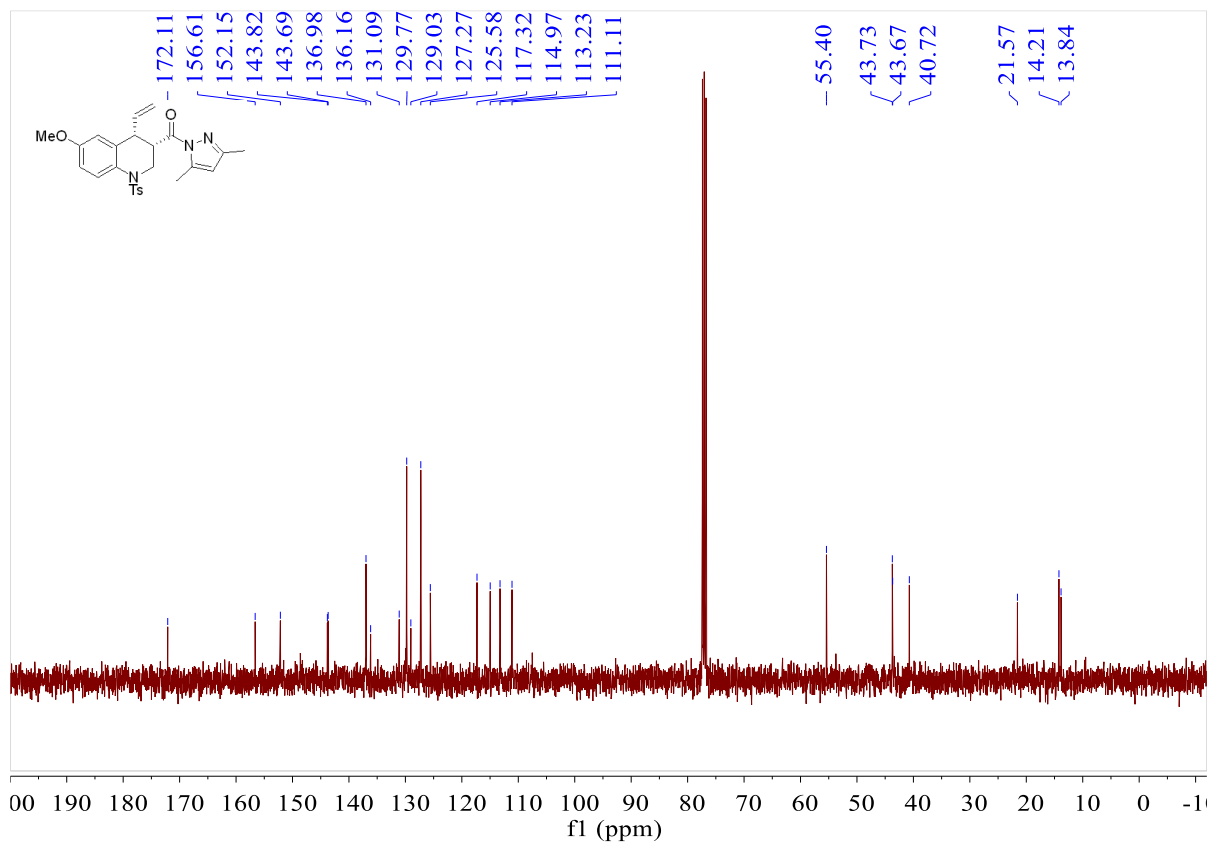

<sup>1</sup>H NMR (400 MHz, CDCl<sub>3</sub>) of product **3j**

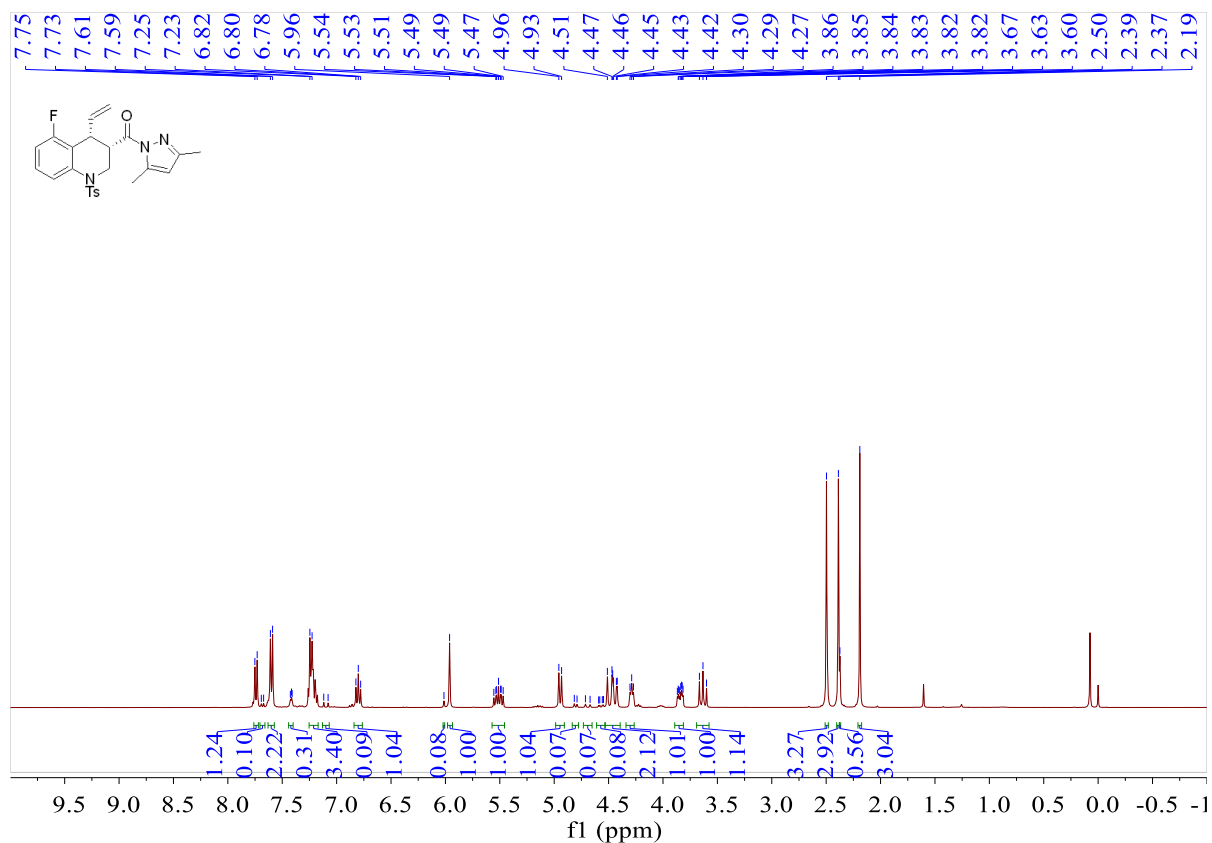

<sup>13</sup>C NMR (100 MHz, CDCl<sub>3</sub>) of product **3j**

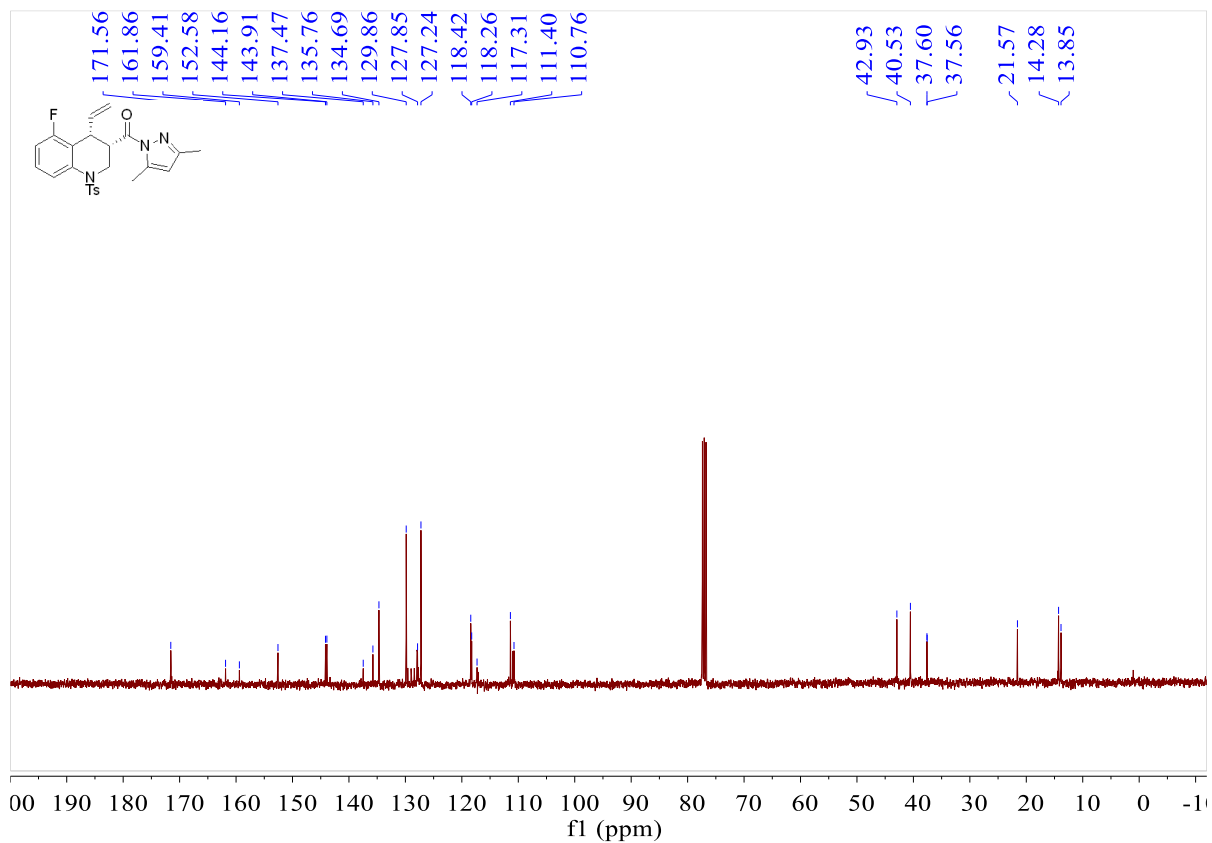

$^{19}\text{F}$  NMR (376 MHz,  $\text{CDCl}_3$ ) of product **3j**

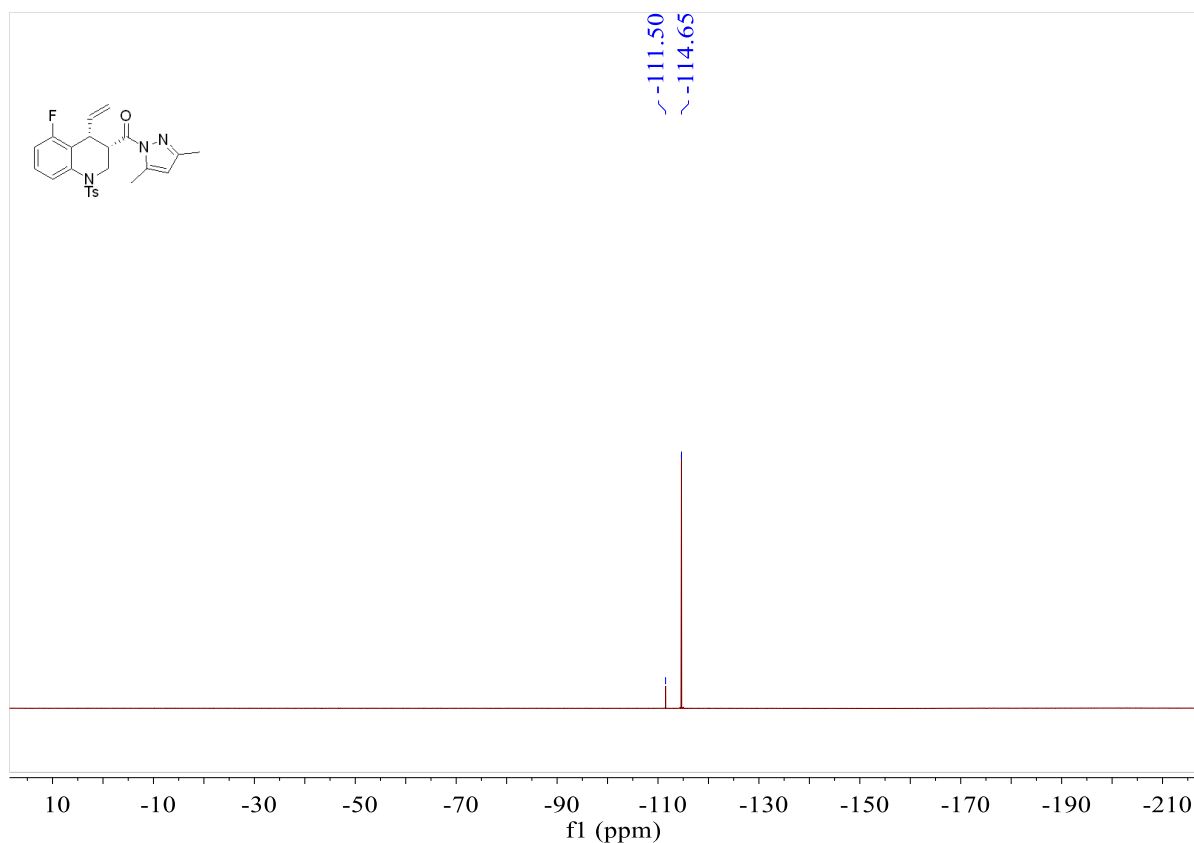

$^1\text{H}$  NMR (400 MHz,  $\text{CDCl}_3$ ) of product **3k**

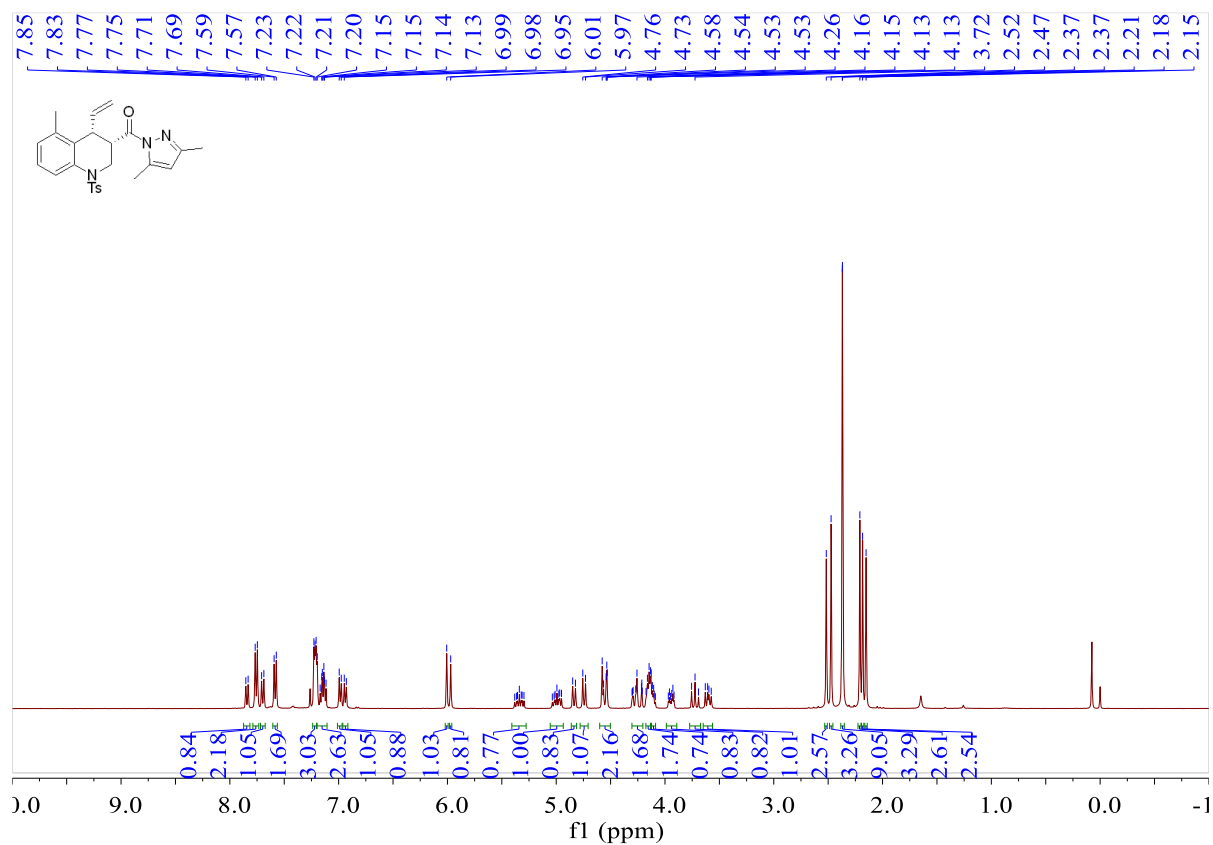

$^{13}\text{C}$  NMR (100 MHz,  $\text{CDCl}_3$ ) of product **3k**

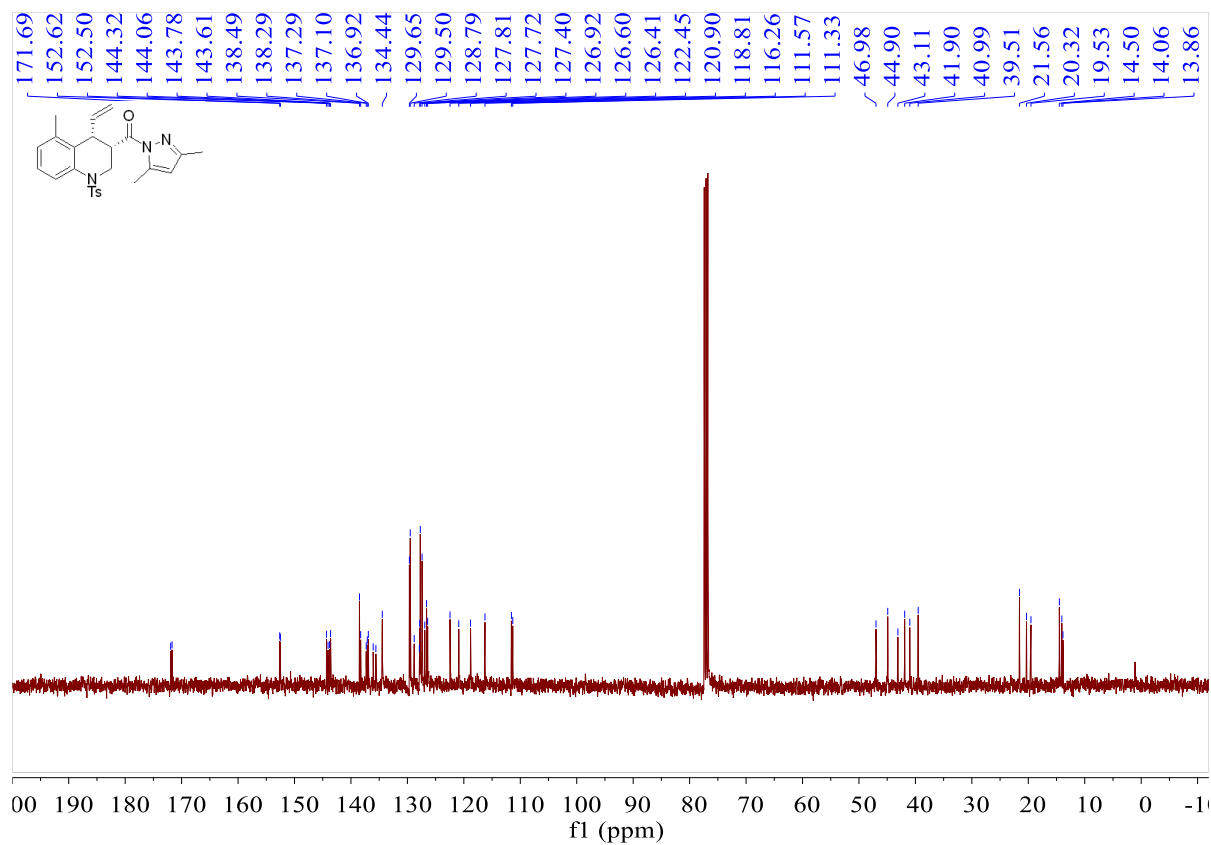

$^1\text{H}$  NMR (400 MHz,  $\text{CDCl}_3$ ) of product **3l**

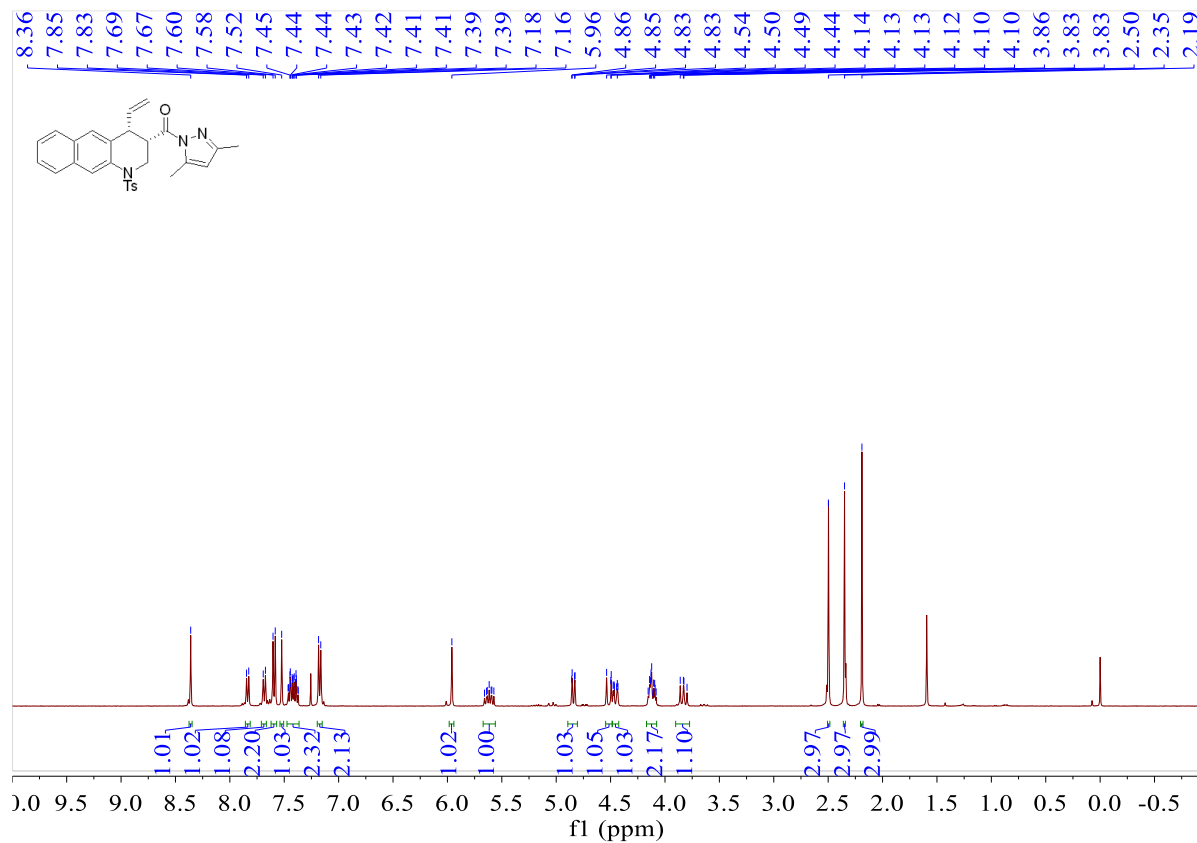

$^{13}\text{C}$  NMR (100 MHz,  $\text{CDCl}_3$ ) of product **3l**

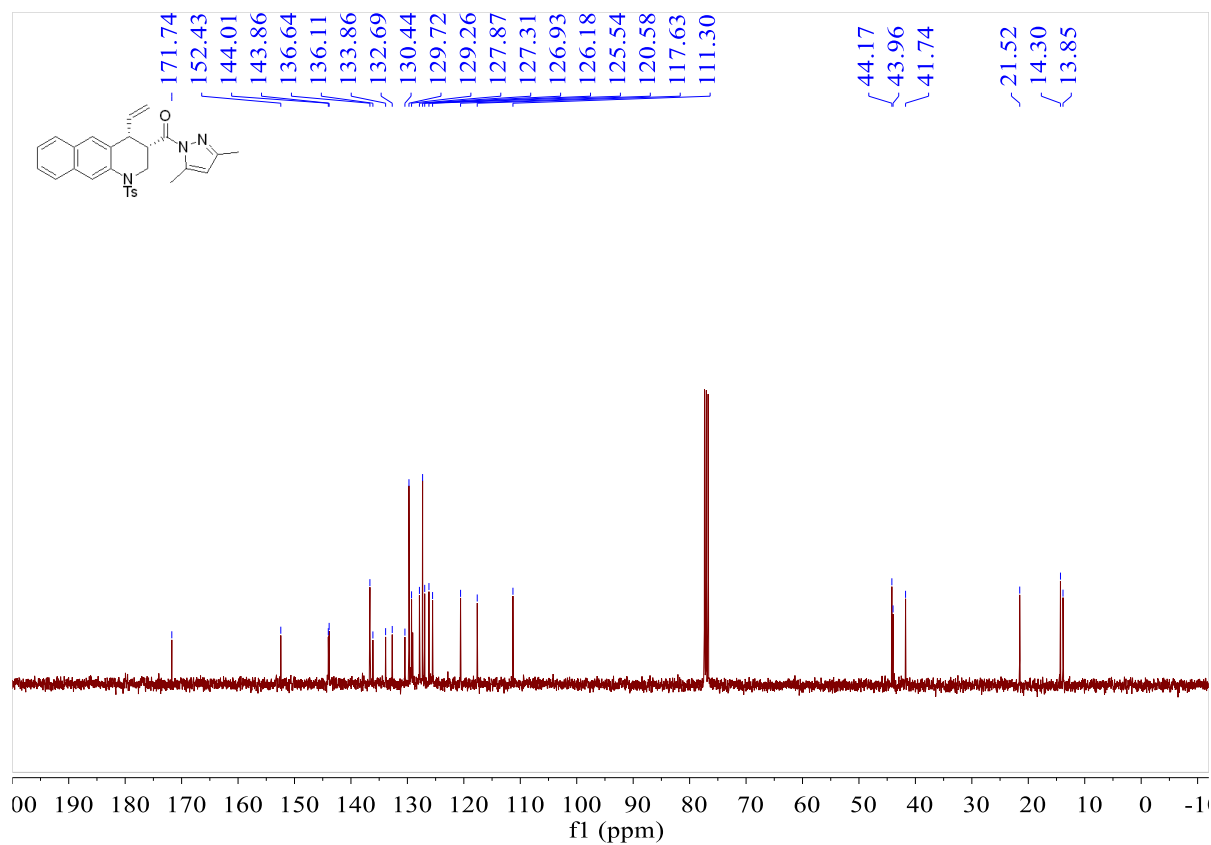

$^1\text{H}$  NMR (400 MHz,  $\text{CDCl}_3$ ) of product **3m**

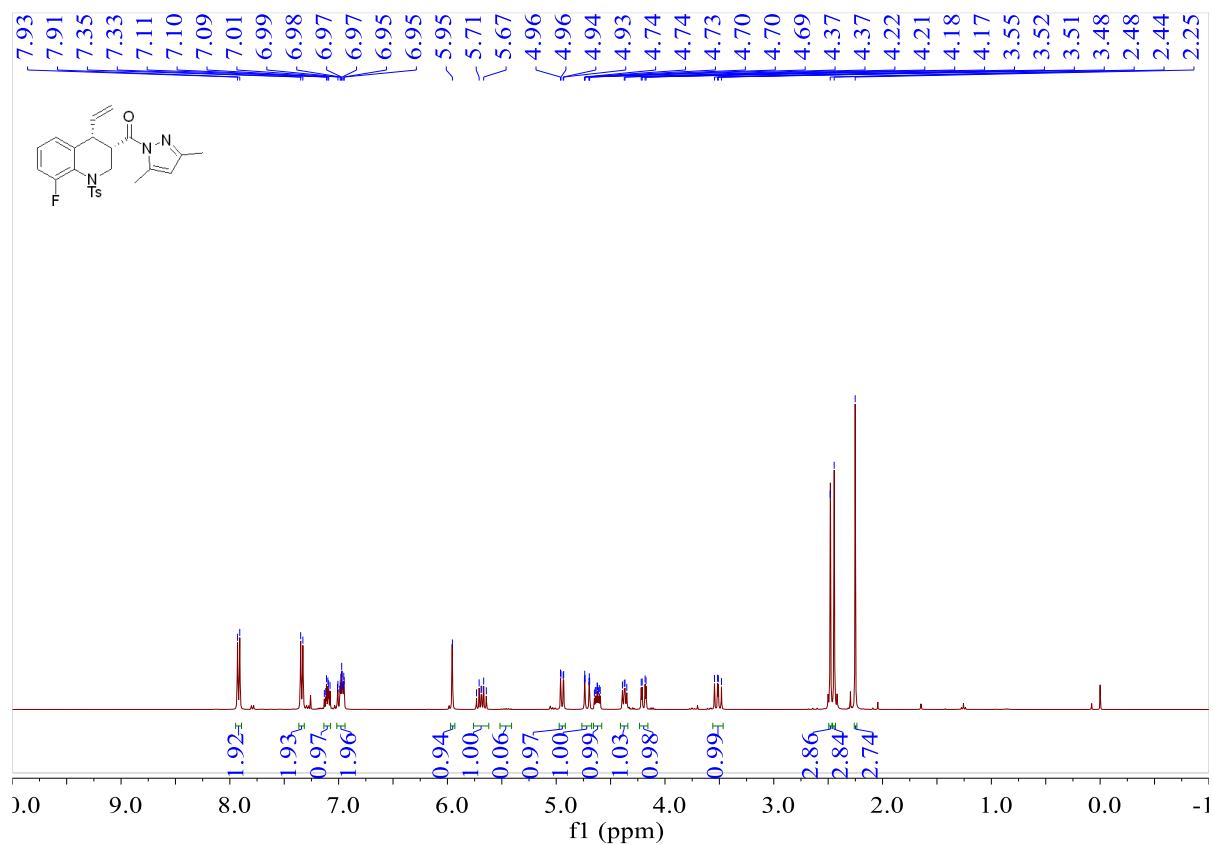

$^{13}\text{C}$  NMR (100 MHz,  $\text{CDCl}_3$ ) of product **3m**

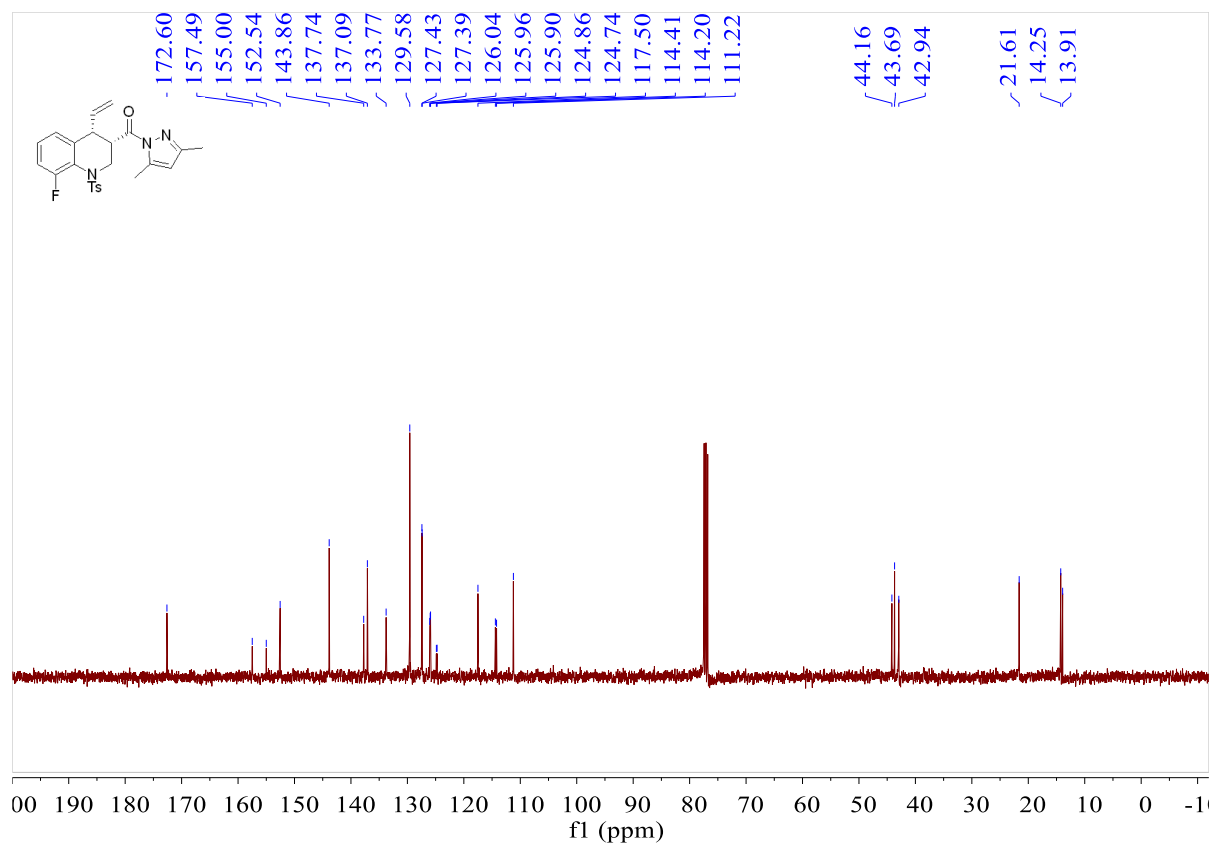

$^{19}\text{F}$  NMR (376 MHz,  $\text{CDCl}_3$ ) of product **3m**

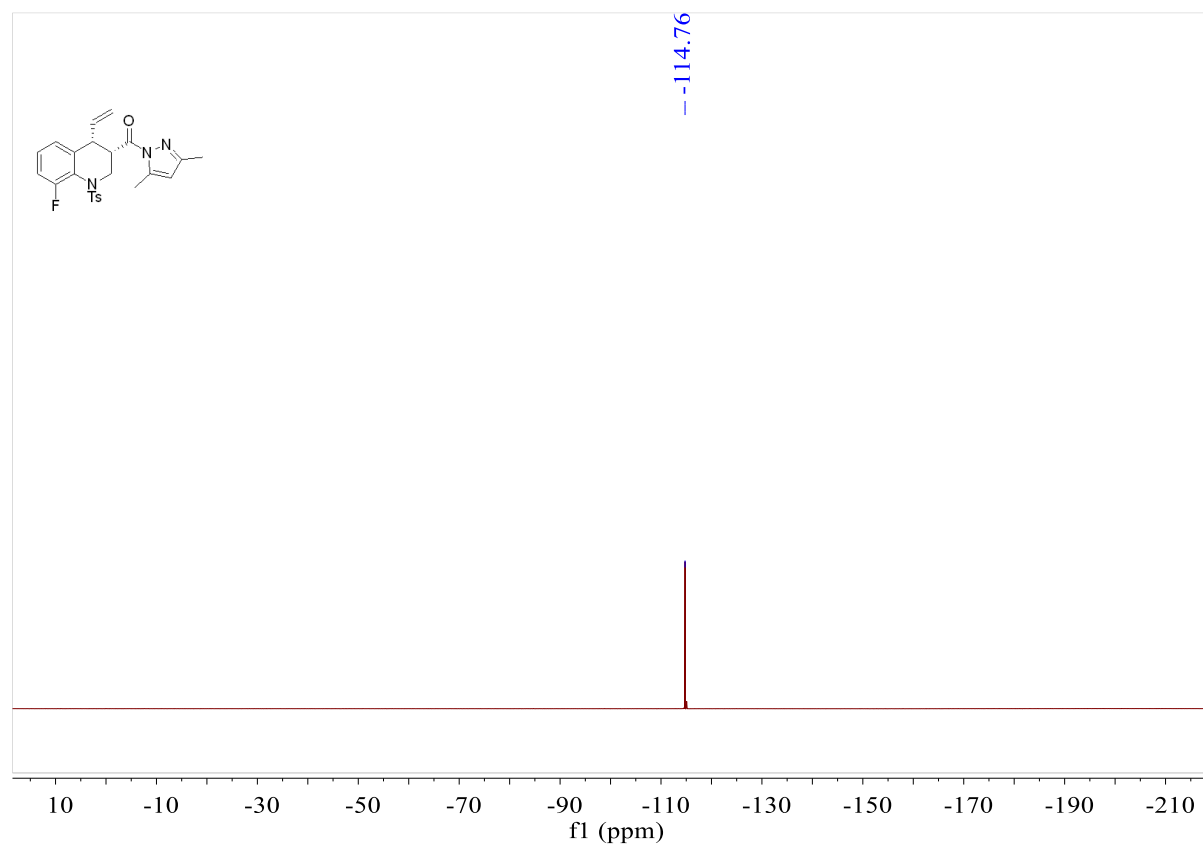

$^1\text{H}$  NMR (400 MHz,  $\text{CDCl}_3$ ) of product **3n**

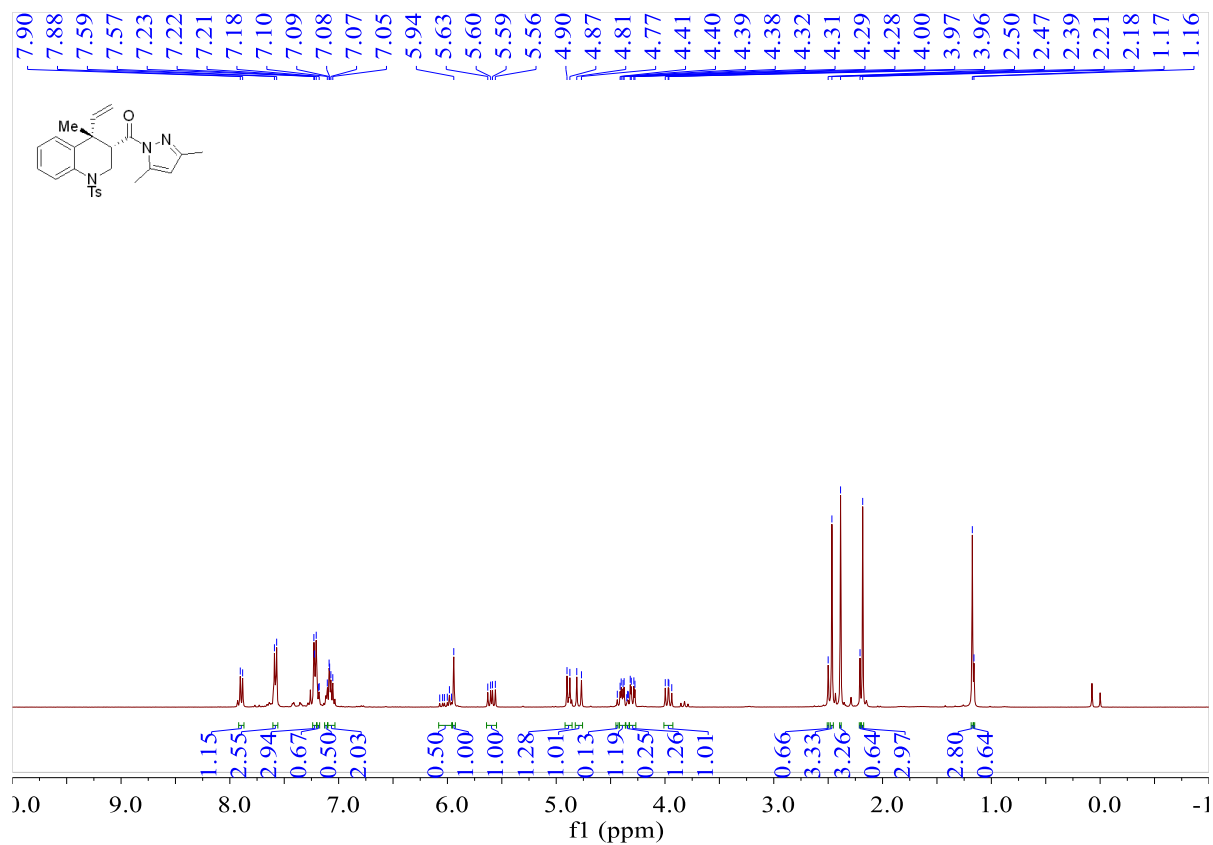

$^{13}\text{C}$  NMR (100 MHz,  $\text{CDCl}_3$ ) of product **3n**

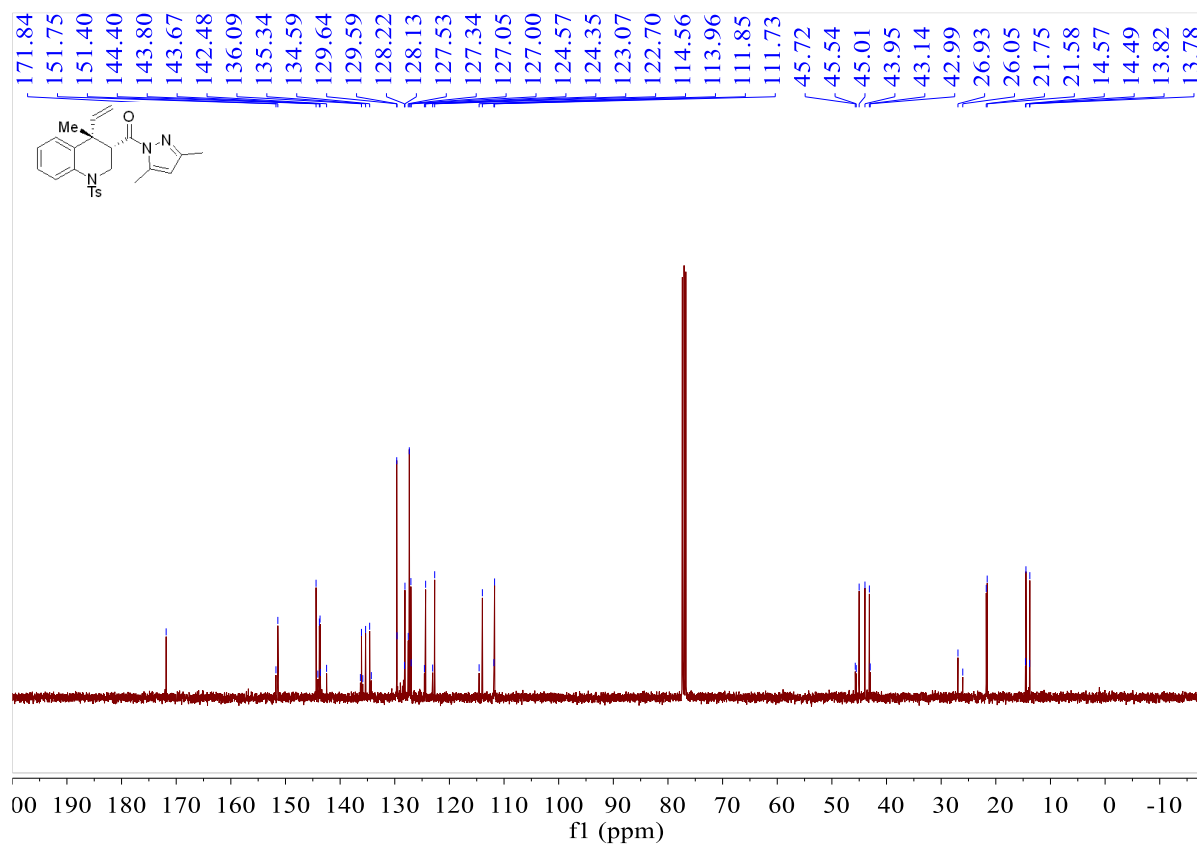

$^1\text{H}$  NMR (400 MHz,  $\text{CDCl}_3$ ) of product **5**

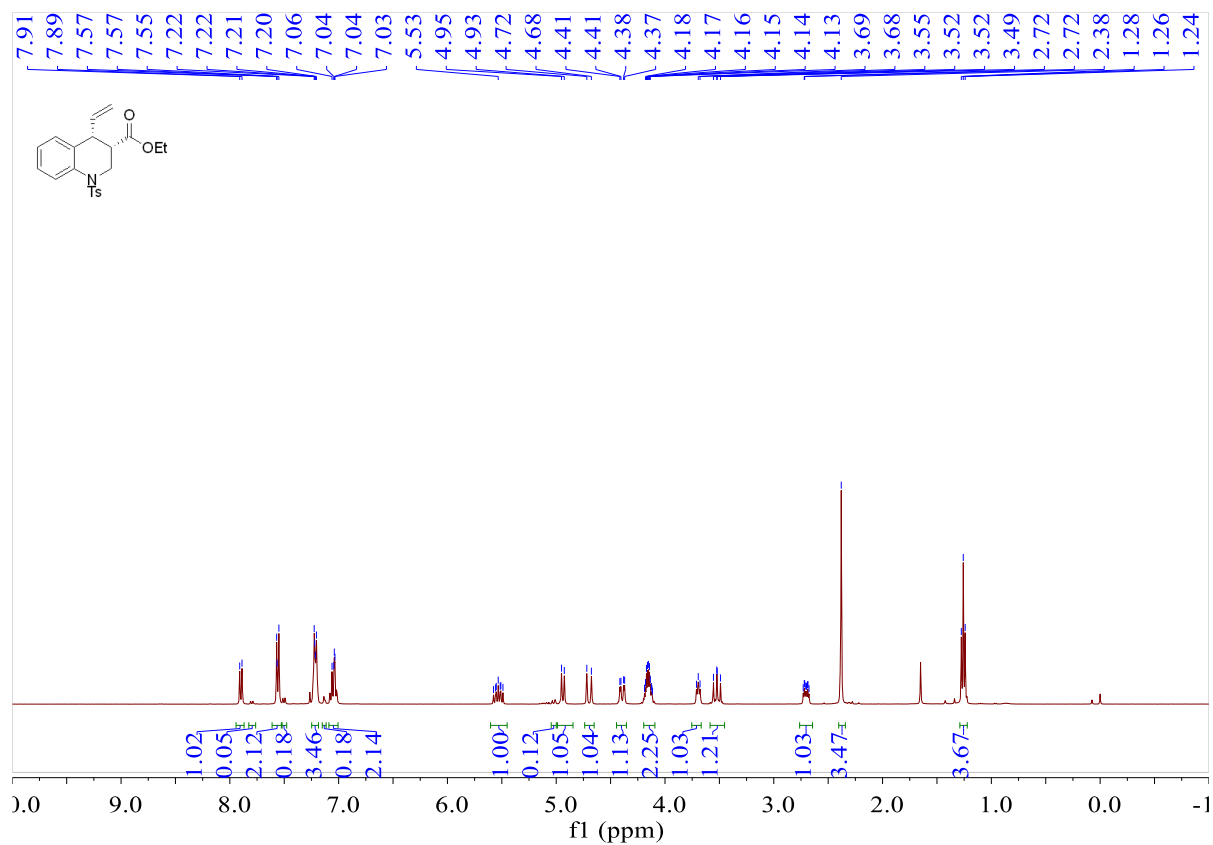

$^{13}\text{C}$  NMR (100 MHz,  $\text{CDCl}_3$ ) of product **5**

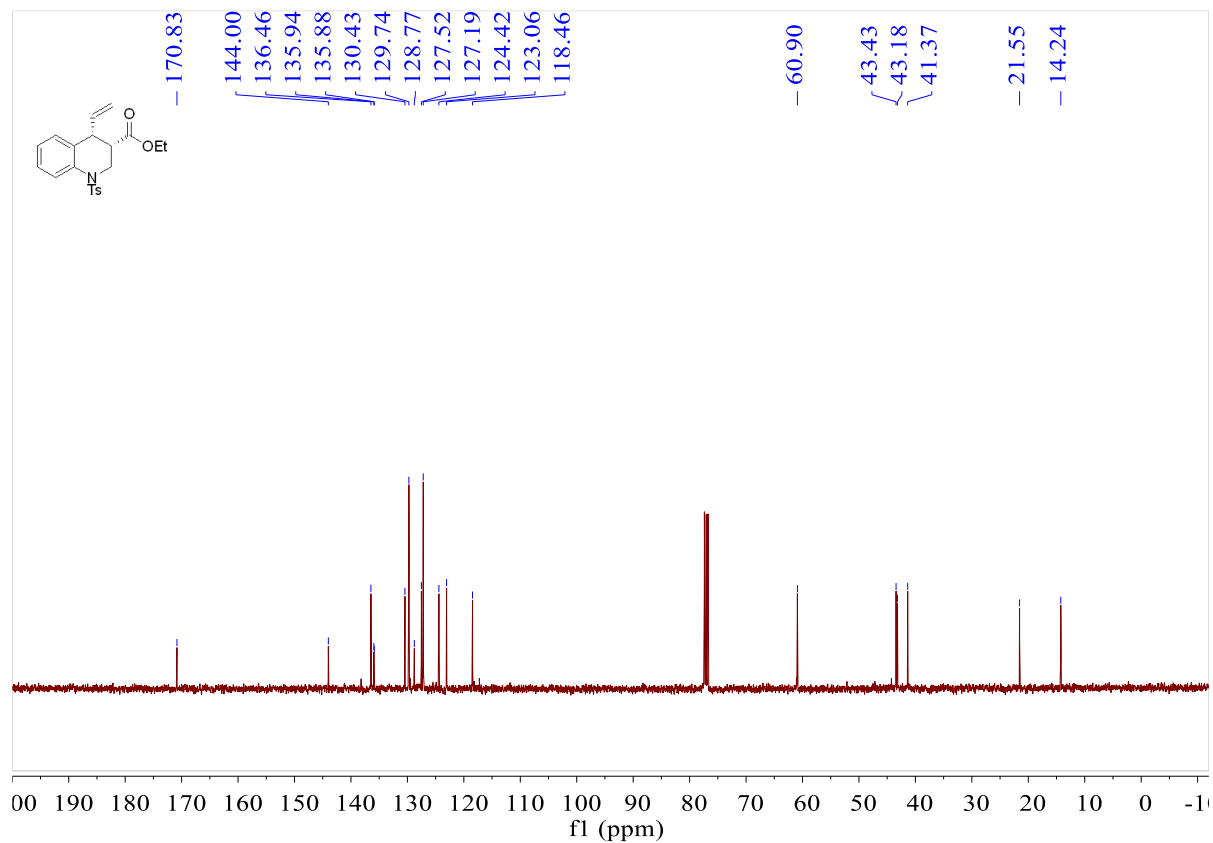

$^1\text{H}$  NMR (400 MHz,  $\text{CDCl}_3$ ) of product **6**

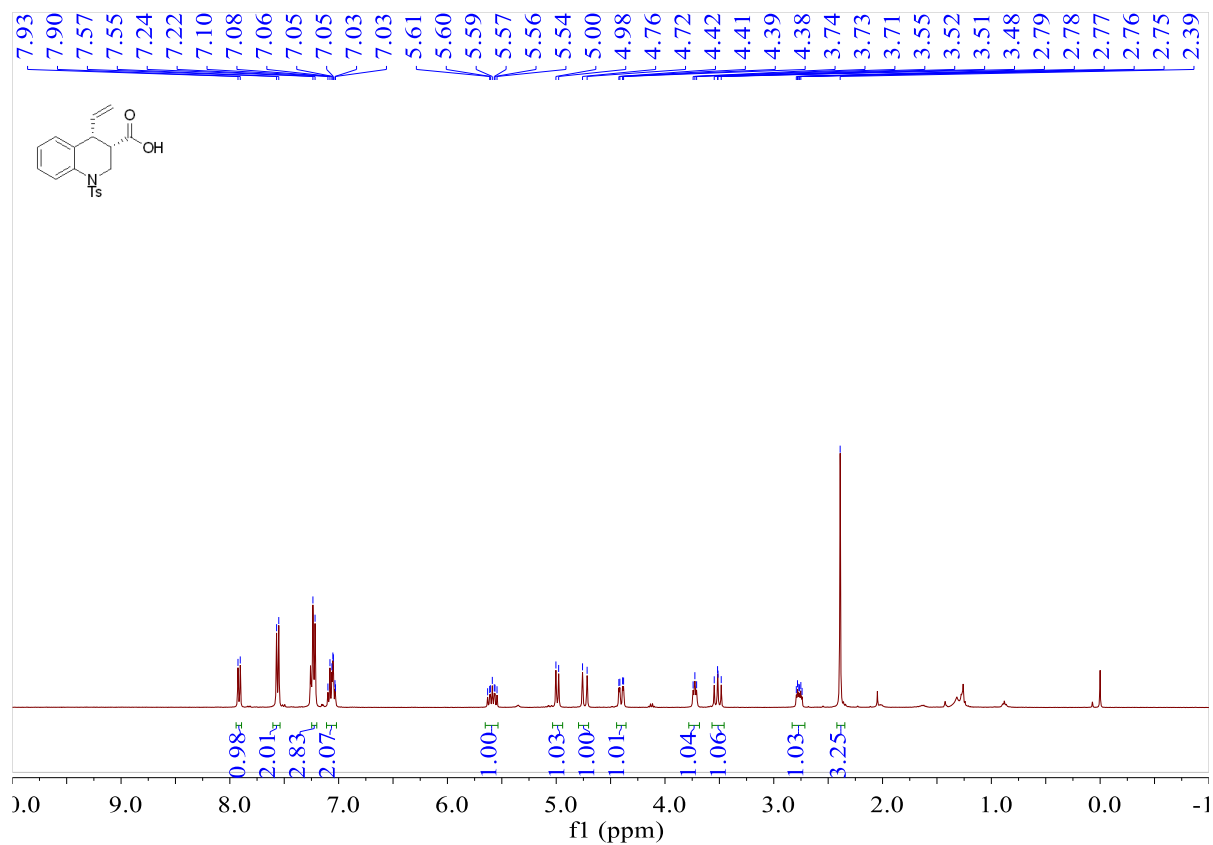

$^{13}\text{C}$  NMR (100 MHz,  $\text{CDCl}_3$ ) of product **6**

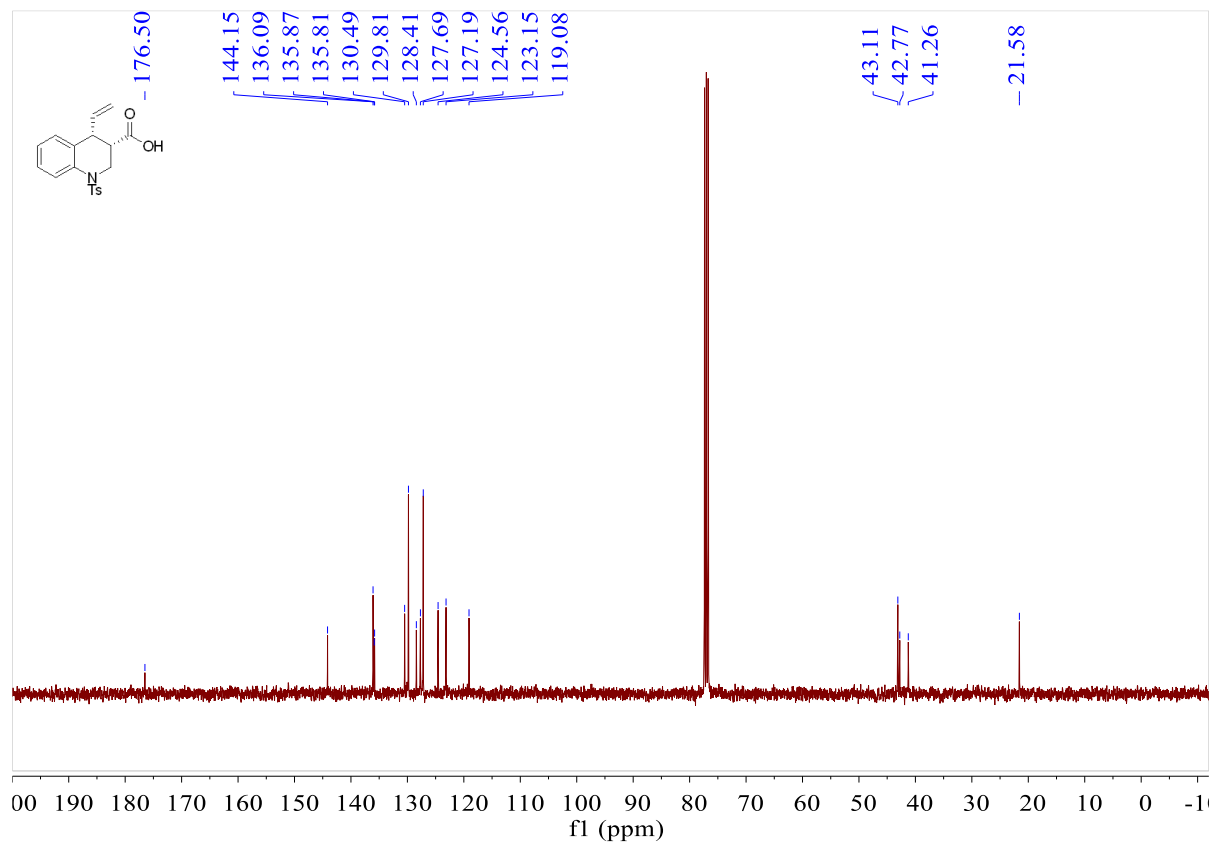

$^1\text{H}$  NMR (400 MHz,  $\text{CDCl}_3$ ) of product **S0**

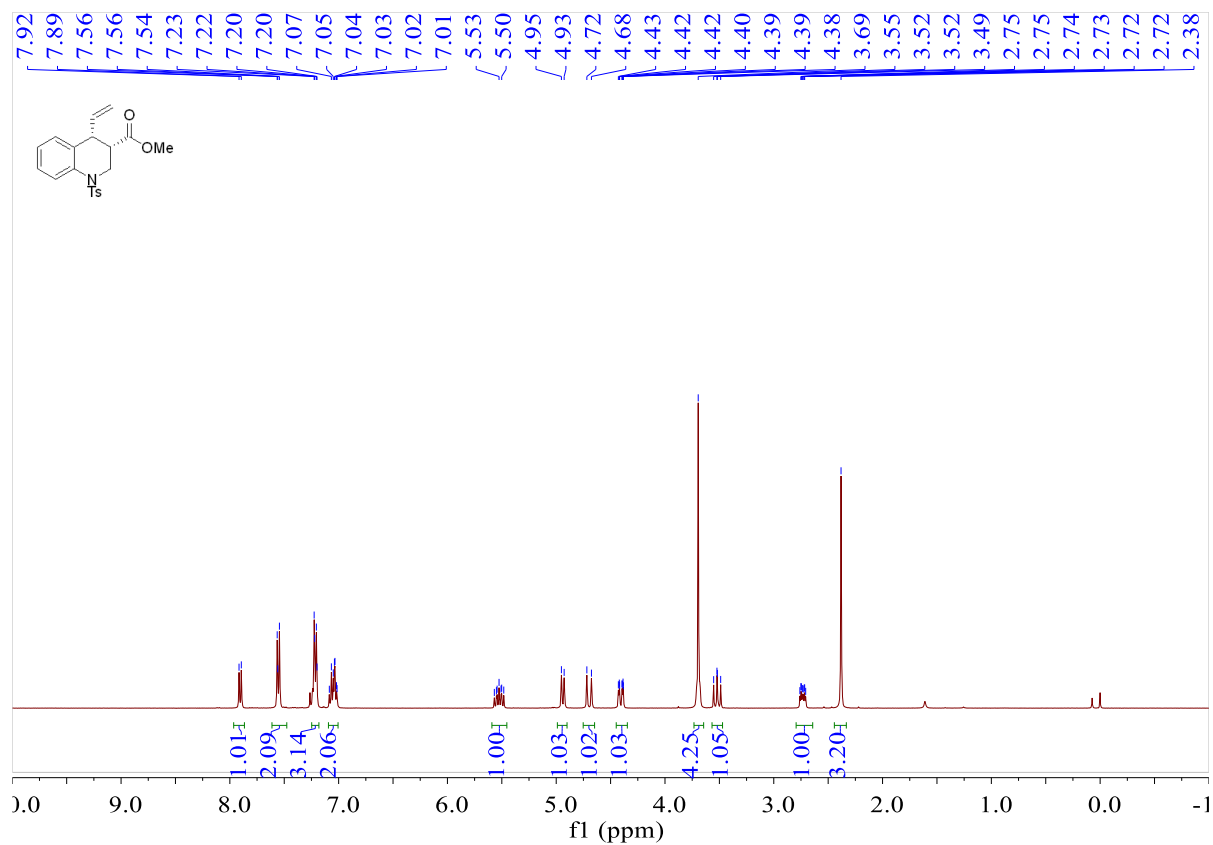

$^{13}\text{C}$  NMR (400 MHz,  $\text{CDCl}_3$ ) of product **S0**

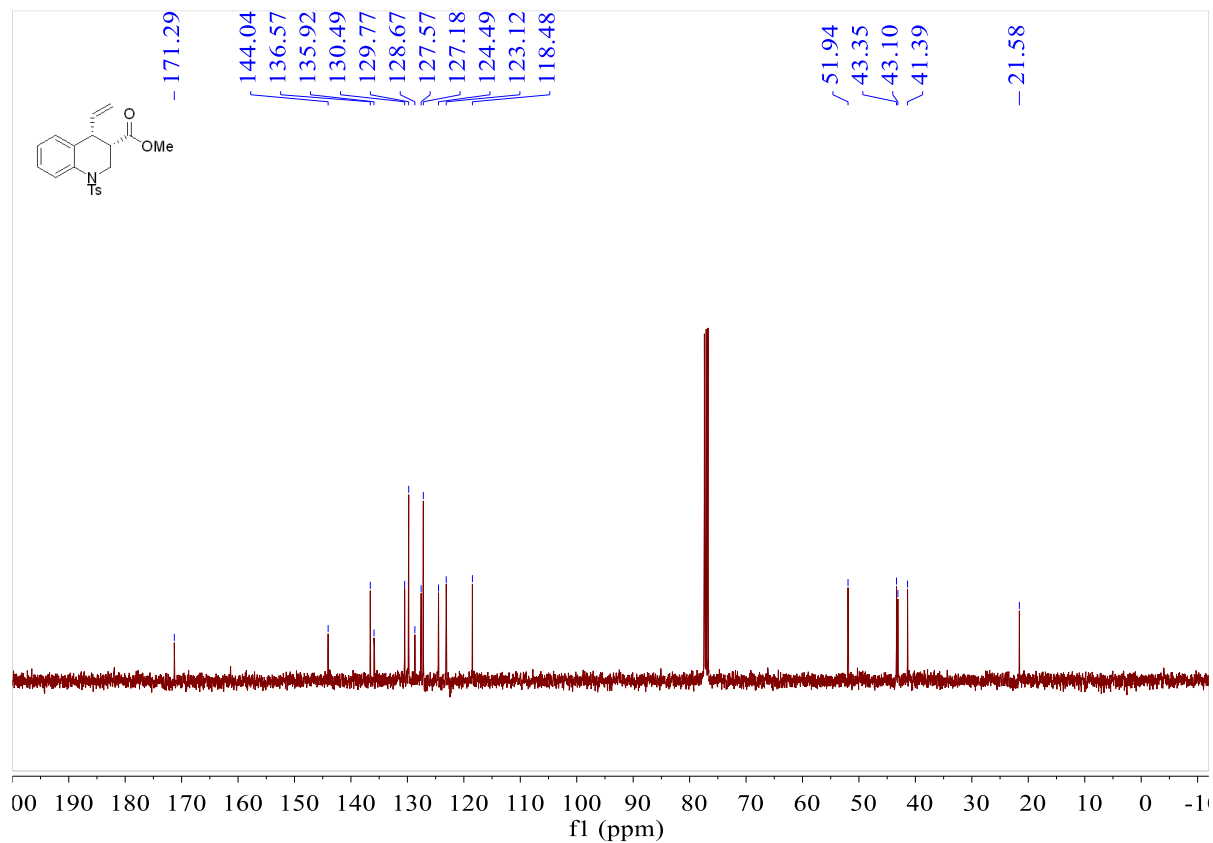

$^1\text{H}$  NMR (400 MHz,  $\text{CDCl}_3$ ) of product **7**

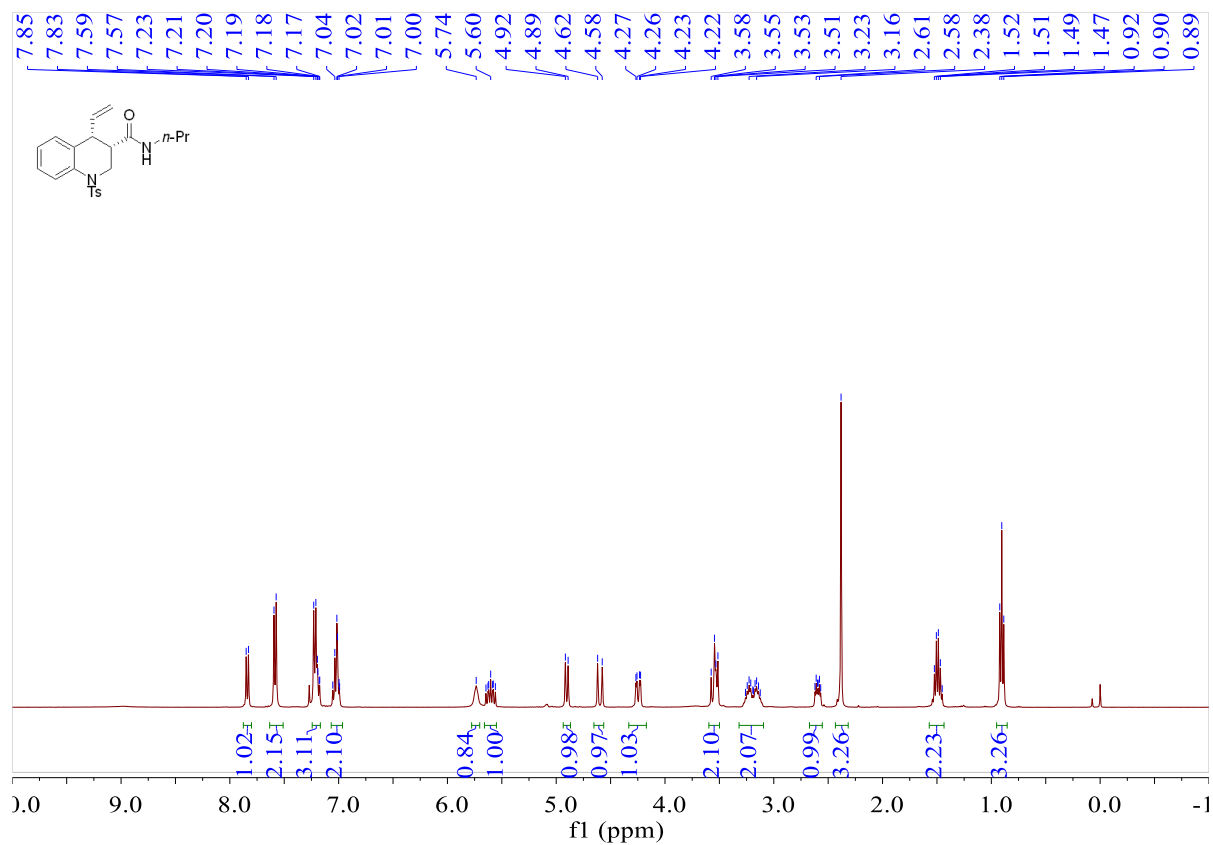

$^{13}\text{C}$  NMR (100 MHz,  $\text{CDCl}_3$ ) of product **7**

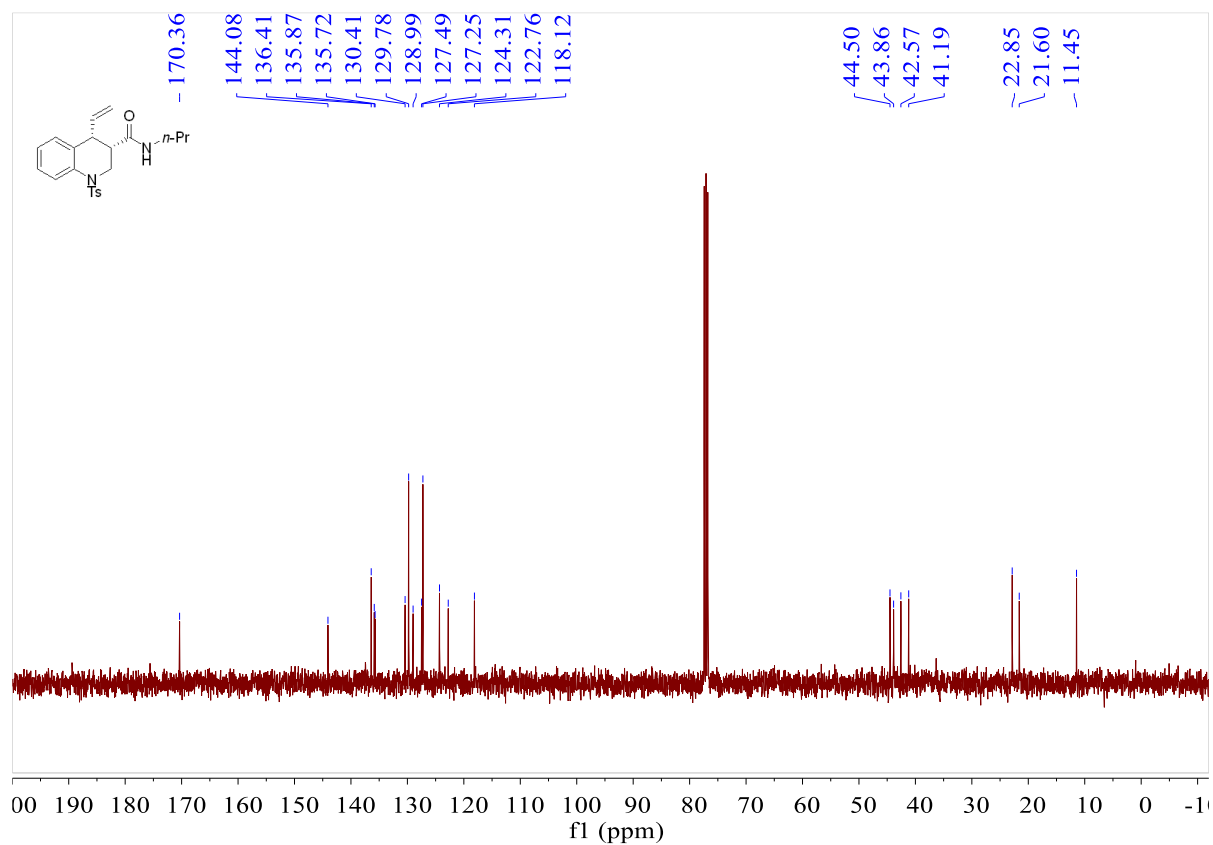

$^1\text{H}$  NMR (100 MHz,  $\text{CDCl}_3$ ) of product **8**

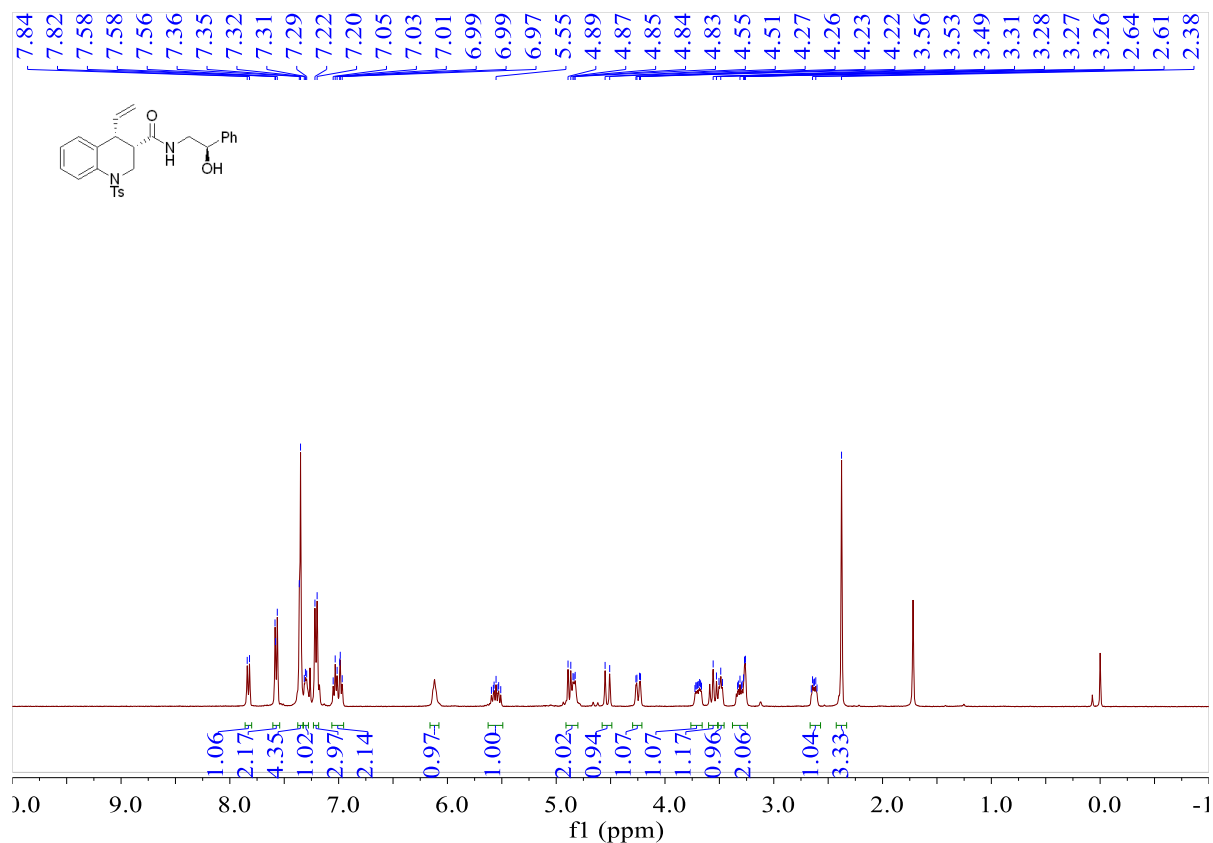

$^{13}\text{C}$  NMR (100 MHz,  $\text{CDCl}_3$ ) of product **8**

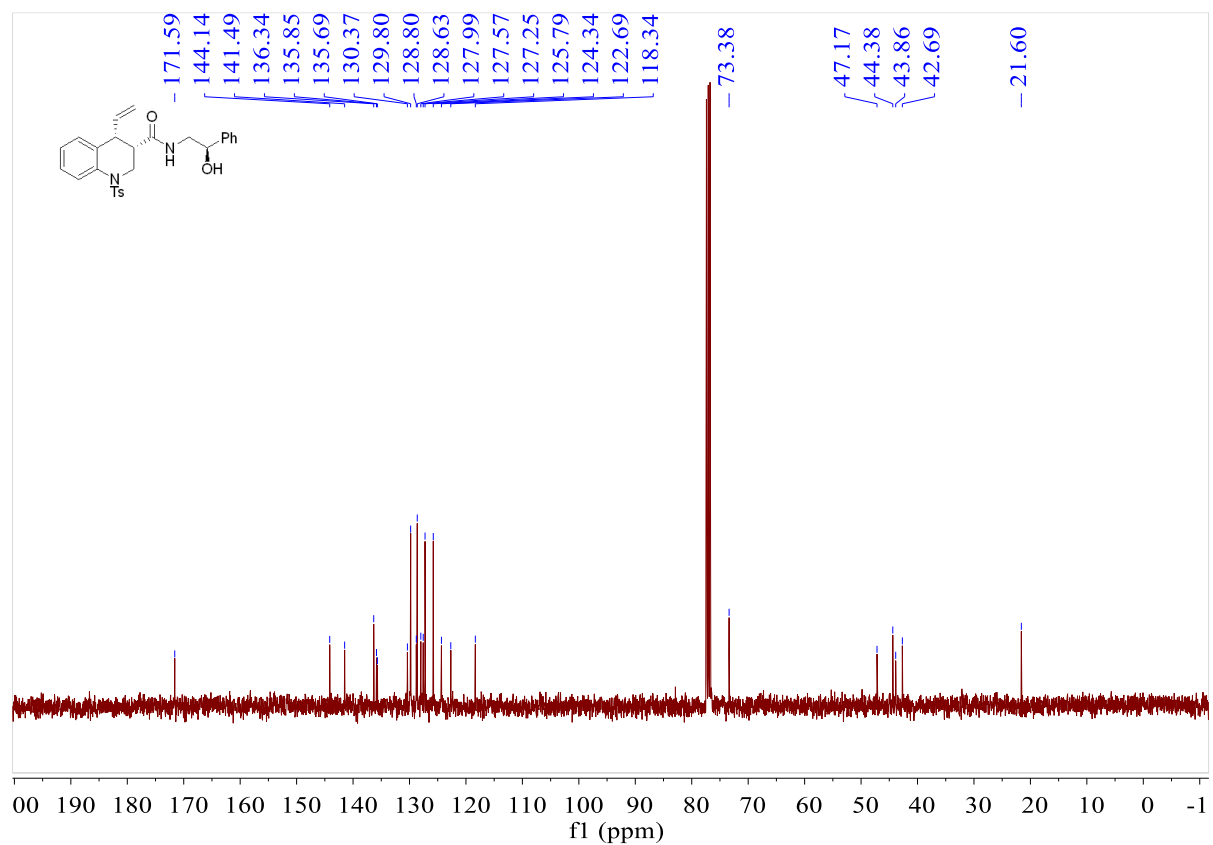

$^1\text{H}$  NMR (400 MHz,  $\text{CDCl}_3$ ) of product **S1**

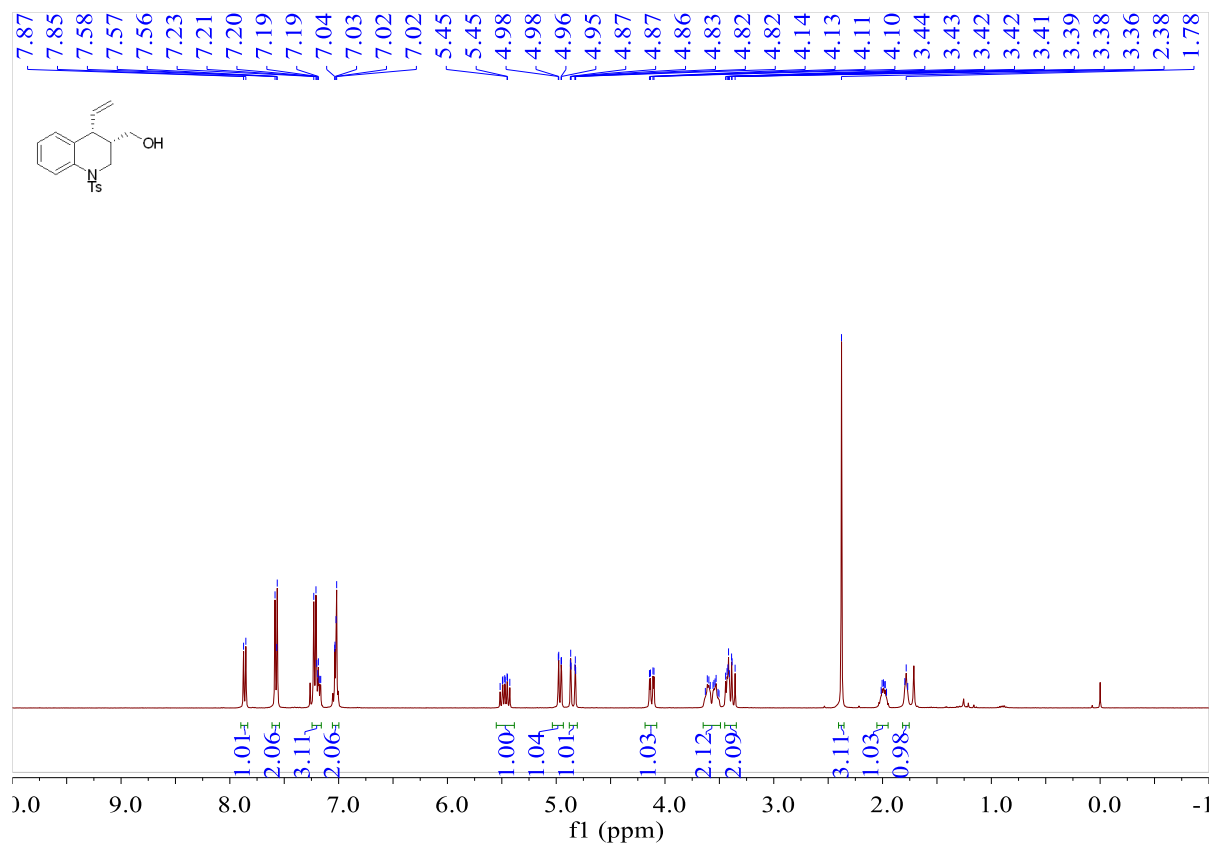

$^{13}\text{C}$  NMR (100 MHz,  $\text{CDCl}_3$ ) of product **S1**

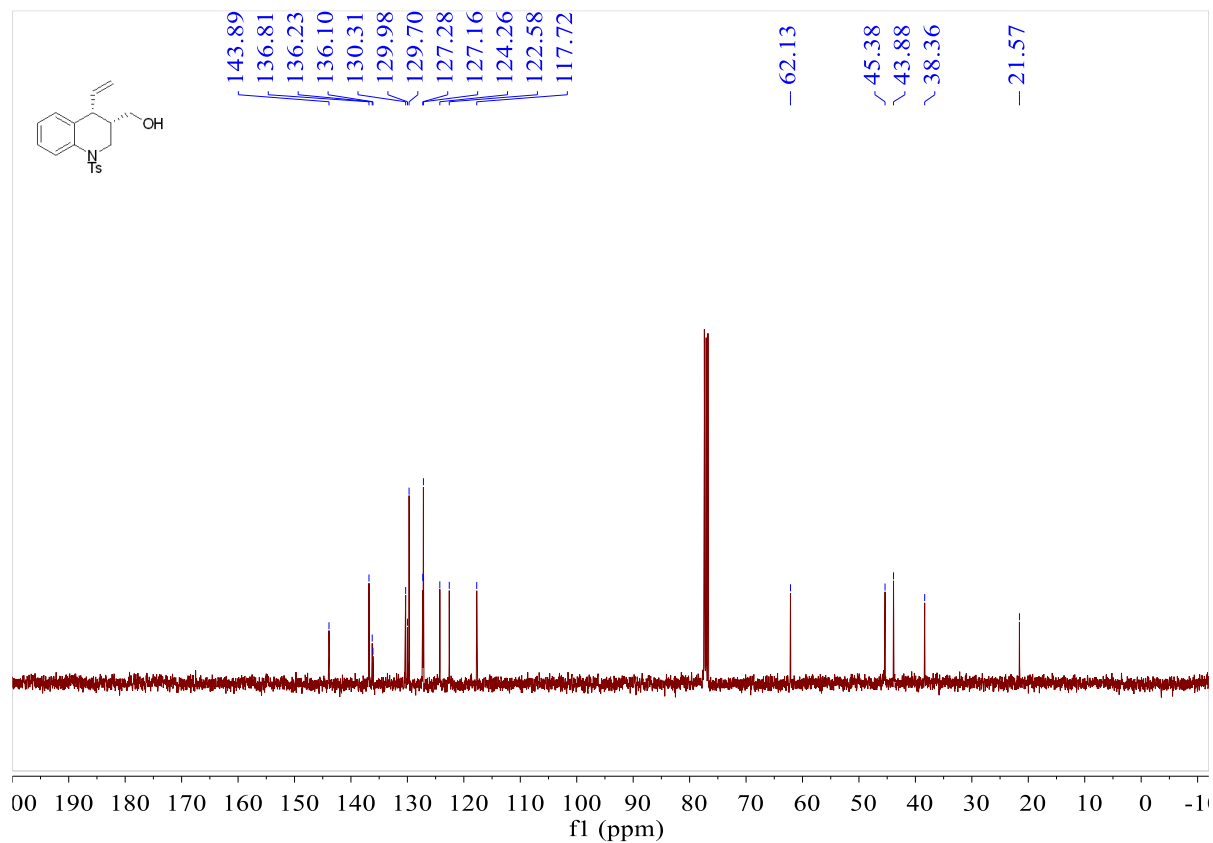

$^1\text{H}$  NMR (400 MHz,  $\text{CDCl}_3$ ) of product **9**

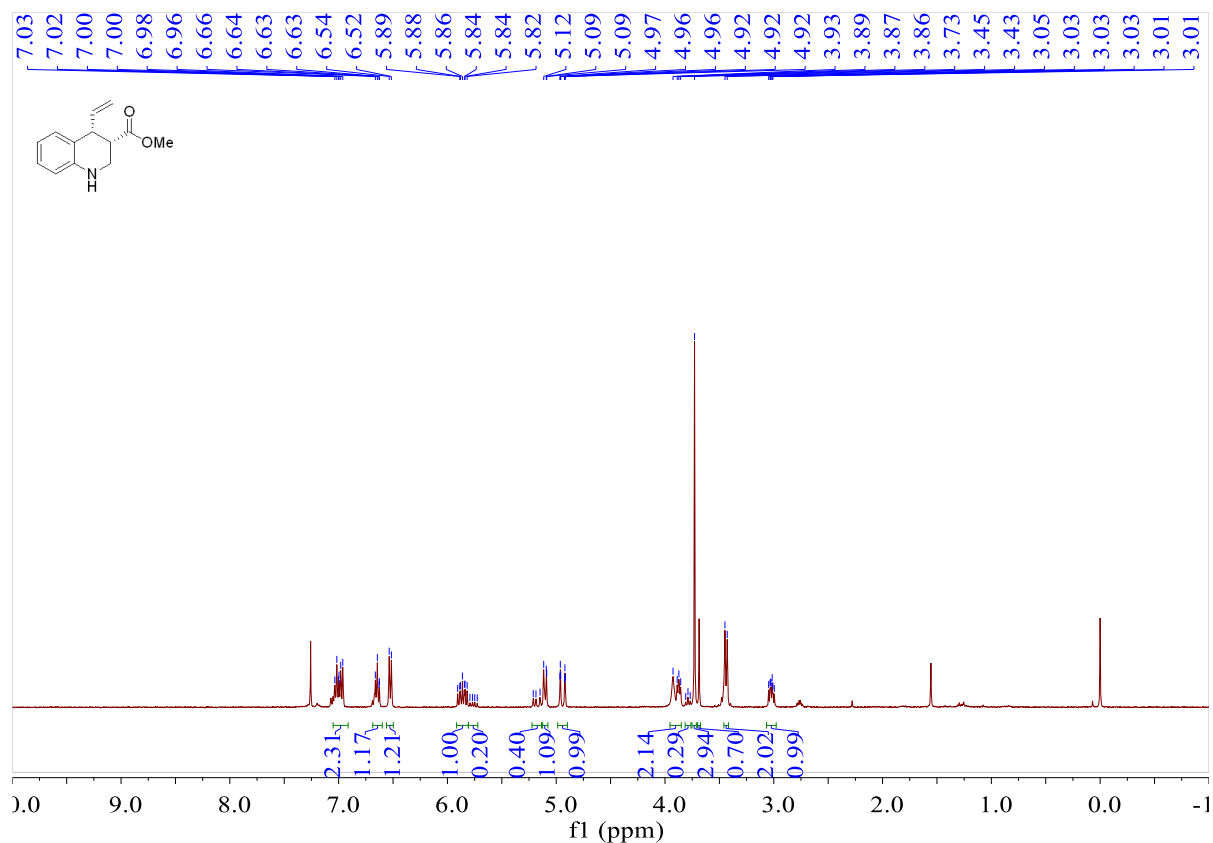

$^{13}\text{C}$  NMR (100 MHz,  $\text{CDCl}_3$ ) of product **9**

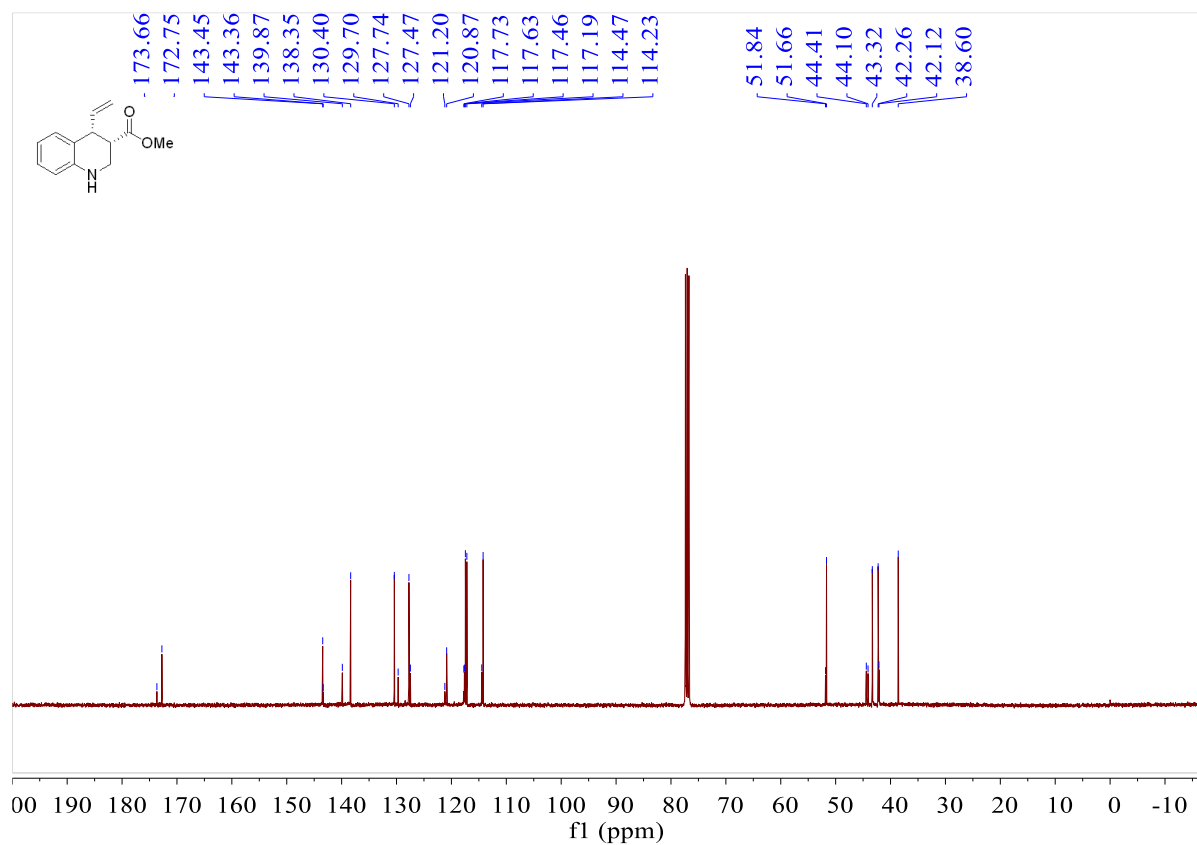

$^1\text{H}$  NMR (400 MHz,  $\text{CDCl}_3$ ) of product **10**

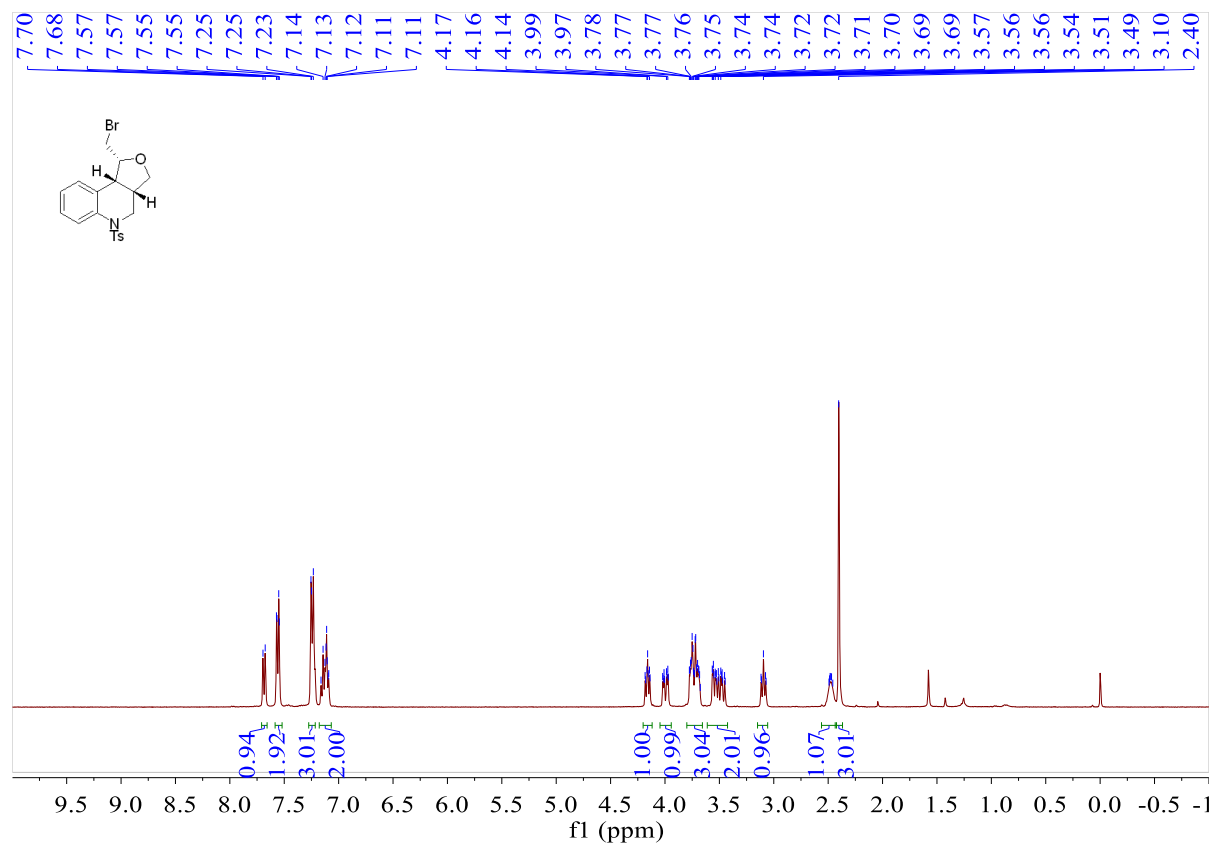

$^{13}\text{C}$  NMR (100 MHz,  $\text{CDCl}_3$ ) of product **10**

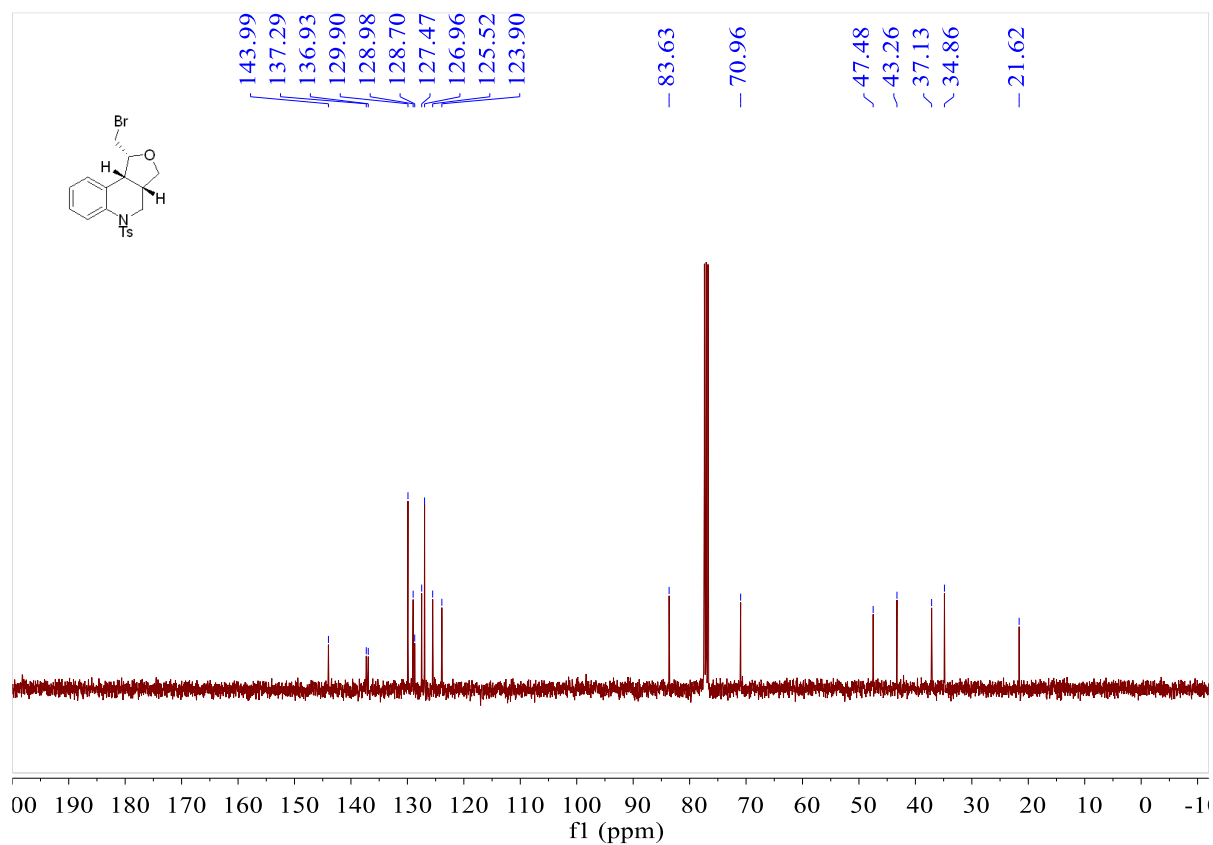

## 9. HPLC Data of Products

| <p>DAD1 B, Sig=254.4 Ref=off (E:\data\XW\DEF_LC 2020-07-11 09-29-48\002-P1-B2-m290c rac.D)</p> 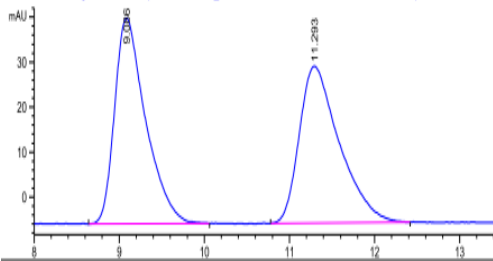 | <div><chem>Cc1cc(C)n(C(=O)C2Cc3ccccc3N(C2)c4ccccc4)C=C)c1</chem><p><b>rac-3a</b></p></div> <table><thead><tr><th>峰 #</th><th>保留时间 [min]</th><th>类型</th><th>峰宽 [min]</th><th>峰面积 [mAU*s]</th><th>峰高 [mAU]</th><th>峰面积 %</th></tr></thead><tbody><tr><td>1</td><td>9.086</td><td>BB</td><td>0.3655</td><td>1158.82629</td><td>45.75510</td><td>50.4496</td></tr><tr><td>2</td><td>11.293</td><td>BB</td><td>0.4688</td><td>1138.17053</td><td>34.86823</td><td>49.5504</td></tr></tbody></table>       | 峰 #  | 保留时间 [min] | 类型          | 峰宽 [min]  | 峰面积 [mAU*s] | 峰高 [mAU] | 峰面积 % | 1 | 9.086  | BB   | 0.3655 | 1158.82629 | 45.75510  | 50.4496 | 2 | 11.293 | BB  | 0.4688 | 1138.17053 | 34.86823  | 49.5504 |
|----------------------------------------------------------------------------------------------------------------------------------------------------------------------------------|------------------------------------------------------------------------------------------------------------------------------------------------------------------------------------------------------------------------------------------------------------------------------------------------------------------------------------------------------------------------------------------------------------------------------------------------------------------------------------------------------|------|------------|-------------|-----------|-------------|----------|-------|---|--------|------|--------|------------|-----------|---------|---|--------|-----|--------|------------|-----------|---------|
| 峰 #                                                                                                                                                                              | 保留时间 [min]                                                                                                                                                                                                                                                                                                                                                                                                                                                                                           | 类型   | 峰宽 [min]   | 峰面积 [mAU*s] | 峰高 [mAU]  | 峰面积 %       |          |       |   |        |      |        |            |           |         |   |        |     |        |            |           |         |
| 1                                                                                                                                                                                | 9.086                                                                                                                                                                                                                                                                                                                                                                                                                                                                                                | BB   | 0.3655     | 1158.82629  | 45.75510  | 50.4496     |          |       |   |        |      |        |            |           |         |   |        |     |        |            |           |         |
| 2                                                                                                                                                                                | 11.293                                                                                                                                                                                                                                                                                                                                                                                                                                                                                               | BB   | 0.4688     | 1138.17053  | 34.86823  | 49.5504     |          |       |   |        |      |        |            |           |         |   |        |     |        |            |           |         |
| <p>DAD1 A, Sig=220.4 Ref=off (E:\data\XW\WPZ-737 2020-07-14 21-38-34\XW347A.D)</p> 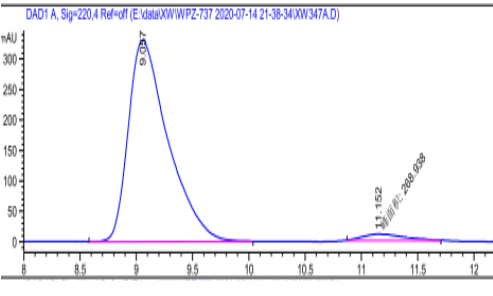             | <div><chem>Cc1cc(C)n(C(=O)C2Cc3ccccc3N(C2)C=C)c1</chem><p><b>3a</b></p></div> <table><thead><tr><th>峰 #</th><th>保留时间 [min]</th><th>类型</th><th>峰宽 [min]</th><th>峰面积 [mAU*s]</th><th>峰高 [mAU]</th><th>峰面积 %</th></tr></thead><tbody><tr><td>1</td><td>9.057</td><td>BV R</td><td>0.3618</td><td>8103.18506</td><td>330.81461</td><td>96.7877</td></tr><tr><td>2</td><td>11.152</td><td>MM</td><td>0.4173</td><td>268.93768</td><td>10.74025</td><td>3.2123</td></tr></tbody></table>                   | 峰 #  | 保留时间 [min] | 类型          | 峰宽 [min]  | 峰面积 [mAU*s] | 峰高 [mAU] | 峰面积 % | 1 | 9.057  | BV R | 0.3618 | 8103.18506 | 330.81461 | 96.7877 | 2 | 11.152 | MM  | 0.4173 | 268.93768  | 10.74025  | 3.2123  |
| 峰 #                                                                                                                                                                              | 保留时间 [min]                                                                                                                                                                                                                                                                                                                                                                                                                                                                                           | 类型   | 峰宽 [min]   | 峰面积 [mAU*s] | 峰高 [mAU]  | 峰面积 %       |          |       |   |        |      |        |            |           |         |   |        |     |        |            |           |         |
| 1                                                                                                                                                                                | 9.057                                                                                                                                                                                                                                                                                                                                                                                                                                                                                                | BV R | 0.3618     | 8103.18506  | 330.81461 | 96.7877     |          |       |   |        |      |        |            |           |         |   |        |     |        |            |           |         |
| 2                                                                                                                                                                                | 11.152                                                                                                                                                                                                                                                                                                                                                                                                                                                                                               | MM   | 0.4173     | 268.93768   | 10.74025  | 3.2123      |          |       |   |        |      |        |            |           |         |   |        |     |        |            |           |         |
| <p>DAD1 A, Sig=220.4 Ref=off (E:\data\XW\DEF_LC 2020-11-25 16-54-52\XW67-2.D)</p> 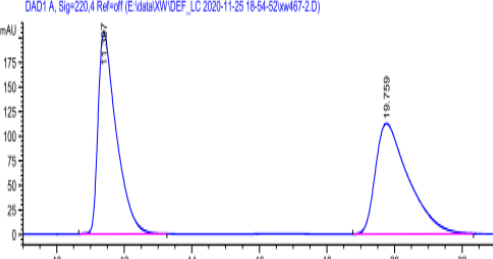            | <div><chem>Cc1cc(C)n(C(=O)C2Cc3cc(F)ccc3N(C2)c4ccccc4)C=C)c1</chem><p><b>rac-3b</b></p></div> <table><thead><tr><th>峰 #</th><th>保留时间 [min]</th><th>类型</th><th>峰宽 [min]</th><th>峰面积 [mAU*s]</th><th>峰高 [mAU]</th><th>峰面积 %</th></tr></thead><tbody><tr><td>1</td><td>11.397</td><td>BB</td><td>0.5490</td><td>7715.66943</td><td>205.04381</td><td>50.2551</td></tr><tr><td>2</td><td>19.759</td><td>BB</td><td>0.9584</td><td>7637.32373</td><td>112.45216</td><td>49.7449</td></tr></tbody></table> | 峰 #  | 保留时间 [min] | 类型          | 峰宽 [min]  | 峰面积 [mAU*s] | 峰高 [mAU] | 峰面积 % | 1 | 11.397 | BB   | 0.5490 | 7715.66943 | 205.04381 | 50.2551 | 2 | 19.759 | BB  | 0.9584 | 7637.32373 | 112.45216 | 49.7449 |
| 峰 #                                                                                                                                                                              | 保留时间 [min]                                                                                                                                                                                                                                                                                                                                                                                                                                                                                           | 类型   | 峰宽 [min]   | 峰面积 [mAU*s] | 峰高 [mAU]  | 峰面积 %       |          |       |   |        |      |        |            |           |         |   |        |     |        |            |           |         |
| 1                                                                                                                                                                                | 11.397                                                                                                                                                                                                                                                                                                                                                                                                                                                                                               | BB   | 0.5490     | 7715.66943  | 205.04381 | 50.2551     |          |       |   |        |      |        |            |           |         |   |        |     |        |            |           |         |
| 2                                                                                                                                                                                | 19.759                                                                                                                                                                                                                                                                                                                                                                                                                                                                                               | BB   | 0.9584     | 7637.32373  | 112.45216 | 49.7449     |          |       |   |        |      |        |            |           |         |   |        |     |        |            |           |         |
| <p>DAD1 A, Sig=220.4 Ref=off (E:\data\XW\DEF_LC 2020-11-25 17-32-48\XW538B.D)</p> 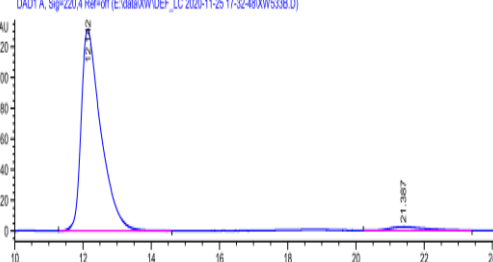            | <div><chem>Cc1cc(C)n(C(=O)C2Cc3cc(F)ccc3N(C2)C=C)c1</chem><p><b>3b</b></p></div> <table><thead><tr><th>峰 #</th><th>保留时间 [min]</th><th>类型</th><th>峰宽 [min]</th><th>峰面积 [mAU*s]</th><th>峰高 [mAU]</th><th>峰面积 %</th></tr></thead><tbody><tr><td>1</td><td>12.142</td><td>BB</td><td>0.5880</td><td>5274.13818</td><td>131.47530</td><td>96.6484</td></tr><tr><td>2</td><td>21.387</td><td>BB</td><td>0.9187</td><td>182.89757</td><td>2.47339</td><td>3.3516</td></tr></tbody></table>                  | 峰 #  | 保留时间 [min] | 类型          | 峰宽 [min]  | 峰面积 [mAU*s] | 峰高 [mAU] | 峰面积 % | 1 | 12.142 | BB   | 0.5880 | 5274.13818 | 131.47530 | 96.6484 | 2 | 21.387 | BB  | 0.9187 | 182.89757  | 2.47339   | 3.3516  |
| 峰 #                                                                                                                                                                              | 保留时间 [min]                                                                                                                                                                                                                                                                                                                                                                                                                                                                                           | 类型   | 峰宽 [min]   | 峰面积 [mAU*s] | 峰高 [mAU]  | 峰面积 %       |          |       |   |        |      |        |            |           |         |   |        |     |        |            |           |         |
| 1                                                                                                                                                                                | 12.142                                                                                                                                                                                                                                                                                                                                                                                                                                                                                               | BB   | 0.5880     | 5274.13818  | 131.47530 | 96.6484     |          |       |   |        |      |        |            |           |         |   |        |     |        |            |           |         |
| 2                                                                                                                                                                                | 21.387                                                                                                                                                                                                                                                                                                                                                                                                                                                                                               | BB   | 0.9187     | 182.89757   | 2.47339   | 3.3516      |          |       |   |        |      |        |            |           |         |   |        |     |        |            |           |         |
| <p>DAD1 B, Sig=254.4 Ref=off (E:\data\XW\DEF_LC 2021-01-25 11-57-07\XW539rac.D)</p> 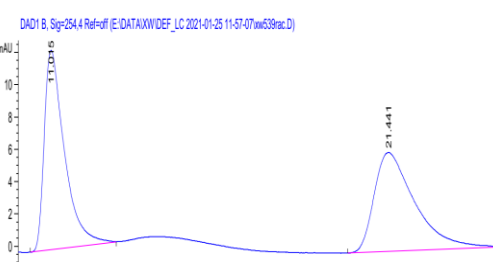          | <div><chem>Cc1cc(C)n(C(=O)C2Cc3cc(Cl)ccc3N(C2)c4ccccc4)C=C)c1</chem><p><b>rac-3c</b></p></div> <table><thead><tr><th>峰 #</th><th>保留时间 [min]</th><th>类型</th><th>峰宽 [min]</th><th>峰面积 [mAU*s]</th><th>峰高 [mAU]</th><th>峰面积 %</th></tr></thead><tbody><tr><td>1</td><td>11.015</td><td>BB</td><td>0.6336</td><td>535.10706</td><td>12.34658</td><td>50.0737</td></tr><tr><td>2</td><td>21.441</td><td>BBA</td><td>1.0873</td><td>533.53253</td><td>6.13062</td><td>49.9263</td></tr></tbody></table>    | 峰 #  | 保留时间 [min] | 类型          | 峰宽 [min]  | 峰面积 [mAU*s] | 峰高 [mAU] | 峰面积 % | 1 | 11.015 | BB   | 0.6336 | 535.10706  | 12.34658  | 50.0737 | 2 | 21.441 | BBA | 1.0873 | 533.53253  | 6.13062   | 49.9263 |
| 峰 #                                                                                                                                                                              | 保留时间 [min]                                                                                                                                                                                                                                                                                                                                                                                                                                                                                           | 类型   | 峰宽 [min]   | 峰面积 [mAU*s] | 峰高 [mAU]  | 峰面积 %       |          |       |   |        |      |        |            |           |         |   |        |     |        |            |           |         |
| 1                                                                                                                                                                                | 11.015                                                                                                                                                                                                                                                                                                                                                                                                                                                                                               | BB   | 0.6336     | 535.10706   | 12.34658  | 50.0737     |          |       |   |        |      |        |            |           |         |   |        |     |        |            |           |         |
| 2                                                                                                                                                                                | 21.441                                                                                                                                                                                                                                                                                                                                                                                                                                                                                               | BBA  | 1.0873     | 533.53253   | 6.13062   | 49.9263     |          |       |   |        |      |        |            |           |         |   |        |     |        |            |           |         |

| <p>DAD1 B, Sig=254.4 Ref=off (E:\data\DLDEF_LC 2020-12-07 07:45:55\w539-2.D)</p> 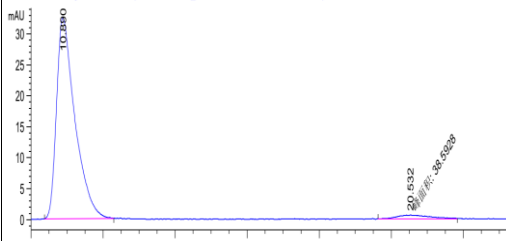                    | <div>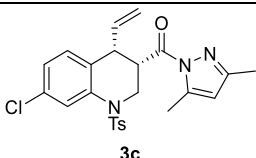<p><b>3c</b></p></div> <table><tr><th>峰 #</th><th>保留时间 [min]</th><th>类型</th><th>峰宽 [min]</th><th>峰面积 [mAU*s]</th><th>峰高 [mAU]</th><th>峰面积 %</th></tr><tr><td>1</td><td>10.890</td><td>BB</td><td>0.5161</td><td>1151.13525</td><td>32.43196</td><td>96.7562</td></tr><tr><td>2</td><td>20.532</td><td>MM</td><td>1.0434</td><td>38.59284</td><td>6.16436e-1</td><td>3.2438</td></tr></table>      | 峰 # | 保留时间 [min] | 类型          | 峰宽 [min]   | 峰面积 [mAU*s] | 峰高 [mAU] | 峰面积 % | 1 | 10.890 | BB | 0.5161 | 1151.13525 | 32.43196  | 96.7562 | 2 | 20.532 | MM | 1.0434 | 38.59284   | 6.16436e-1 | 3.2438  |
|---------------------------------------------------------------------------------------------------------------------------------------------------------------------------------------|------------------------------------------------------------------------------------------------------------------------------------------------------------------------------------------------------------------------------------------------------------------------------------------------------------------------------------------------------------------------------------------------------------------------------------------------------------------------------------------|-----|------------|-------------|------------|-------------|----------|-------|---|--------|----|--------|------------|-----------|---------|---|--------|----|--------|------------|------------|---------|
| 峰 #                                                                                                                                                                                   | 保留时间 [min]                                                                                                                                                                                                                                                                                                                                                                                                                                                                               | 类型  | 峰宽 [min]   | 峰面积 [mAU*s] | 峰高 [mAU]   | 峰面积 %       |          |       |   |        |    |        |            |           |         |   |        |    |        |            |            |         |
| 1                                                                                                                                                                                     | 10.890                                                                                                                                                                                                                                                                                                                                                                                                                                                                                   | BB  | 0.5161     | 1151.13525  | 32.43196   | 96.7562     |          |       |   |        |    |        |            |           |         |   |        |    |        |            |            |         |
| 2                                                                                                                                                                                     | 20.532                                                                                                                                                                                                                                                                                                                                                                                                                                                                                   | MM  | 1.0434     | 38.59284    | 6.16436e-1 | 3.2438      |          |       |   |        |    |        |            |           |         |   |        |    |        |            |            |         |
| <p>DAD1 B, Sig=254.4 Ref=off (E:\data\XWDEF_LC 2020-11-25 18:54:52\w470b-2.D)</p> 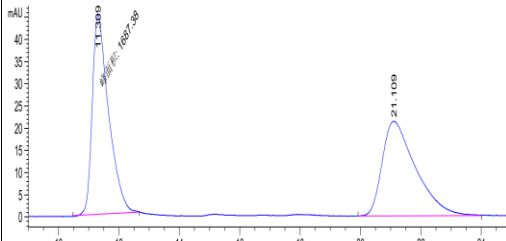                   | <div>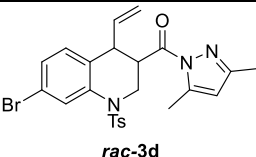<p><b>rac-3d</b></p></div> <table><tr><th>峰 #</th><th>保留时间 [min]</th><th>类型</th><th>峰宽 [min]</th><th>峰面积 [mAU*s]</th><th>峰高 [mAU]</th><th>峰面积 %</th></tr><tr><td>1</td><td>11.309</td><td>MM</td><td>0.6270</td><td>1687.38452</td><td>44.85280</td><td>50.7363</td></tr><tr><td>2</td><td>21.109</td><td>BB</td><td>1.0644</td><td>1638.40808</td><td>21.32492</td><td>49.2637</td></tr></table> | 峰 # | 保留时间 [min] | 类型          | 峰宽 [min]   | 峰面积 [mAU*s] | 峰高 [mAU] | 峰面积 % | 1 | 11.309 | MM | 0.6270 | 1687.38452 | 44.85280  | 50.7363 | 2 | 21.109 | BB | 1.0644 | 1638.40808 | 21.32492   | 49.2637 |
| 峰 #                                                                                                                                                                                   | 保留时间 [min]                                                                                                                                                                                                                                                                                                                                                                                                                                                                               | 类型  | 峰宽 [min]   | 峰面积 [mAU*s] | 峰高 [mAU]   | 峰面积 %       |          |       |   |        |    |        |            |           |         |   |        |    |        |            |            |         |
| 1                                                                                                                                                                                     | 11.309                                                                                                                                                                                                                                                                                                                                                                                                                                                                                   | MM  | 0.6270     | 1687.38452  | 44.85280   | 50.7363     |          |       |   |        |    |        |            |           |         |   |        |    |        |            |            |         |
| 2                                                                                                                                                                                     | 21.109                                                                                                                                                                                                                                                                                                                                                                                                                                                                                   | BB  | 1.0644     | 1638.40808  | 21.32492   | 49.2637     |          |       |   |        |    |        |            |           |         |   |        |    |        |            |            |         |
| <p>DAD1 A, Sig=220.4 Ref=off (E:\data\XWDEF_LC 2020-11-25 18:54:52\w533a2.D)</p> 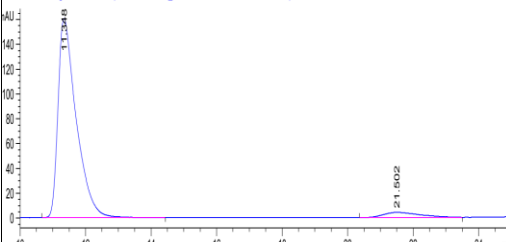                   | <div>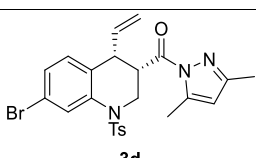<p><b>3d</b></p></div> <table><tr><th>峰 #</th><th>保留时间 [min]</th><th>类型</th><th>峰宽 [min]</th><th>峰面积 [mAU*s]</th><th>峰高 [mAU]</th><th>峰面积 %</th></tr><tr><td>1</td><td>11.348</td><td>BB</td><td>0.5647</td><td>6174.82910</td><td>160.54295</td><td>95.0464</td></tr><tr><td>2</td><td>21.502</td><td>BB</td><td>0.9595</td><td>321.81894</td><td>4.15544</td><td>4.9536</td></tr></table>      | 峰 # | 保留时间 [min] | 类型          | 峰宽 [min]   | 峰面积 [mAU*s] | 峰高 [mAU] | 峰面积 % | 1 | 11.348 | BB | 0.5647 | 6174.82910 | 160.54295 | 95.0464 | 2 | 21.502 | BB | 0.9595 | 321.81894  | 4.15544    | 4.9536  |
| 峰 #                                                                                                                                                                                   | 保留时间 [min]                                                                                                                                                                                                                                                                                                                                                                                                                                                                               | 类型  | 峰宽 [min]   | 峰面积 [mAU*s] | 峰高 [mAU]   | 峰面积 %       |          |       |   |        |    |        |            |           |         |   |        |    |        |            |            |         |
| 1                                                                                                                                                                                     | 11.348                                                                                                                                                                                                                                                                                                                                                                                                                                                                                   | BB  | 0.5647     | 6174.82910  | 160.54295  | 95.0464     |          |       |   |        |    |        |            |           |         |   |        |    |        |            |            |         |
| 2                                                                                                                                                                                     | 21.502                                                                                                                                                                                                                                                                                                                                                                                                                                                                                   | BB  | 0.9595     | 321.81894   | 4.15544    | 4.9536      |          |       |   |        |    |        |            |           |         |   |        |    |        |            |            |         |
| <p>DAD1 B, Sig=254.4 Ref=off (E:\data\XWDEF_LC 2021-01-25 11:57:07\w530a2.D)</p> 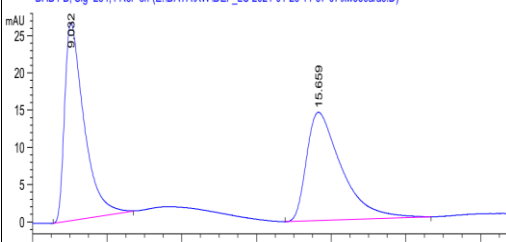                  | <div>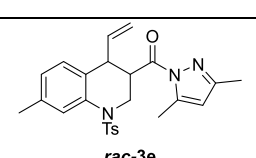<p><b>rac-3e</b></p></div> <table><tr><th>峰 #</th><th>保留时间 [min]</th><th>类型</th><th>峰宽 [min]</th><th>峰面积 [mAU*s]</th><th>峰高 [mAU]</th><th>峰面积 %</th></tr><tr><td>1</td><td>9.032</td><td>BB</td><td>0.5235</td><td>959.01959</td><td>26.54596</td><td>50.3091</td></tr><tr><td>2</td><td>15.659</td><td>BB</td><td>0.9352</td><td>947.23407</td><td>14.55627</td><td>49.6909</td></tr></table>  | 峰 # | 保留时间 [min] | 类型          | 峰宽 [min]   | 峰面积 [mAU*s] | 峰高 [mAU] | 峰面积 % | 1 | 9.032  | BB | 0.5235 | 959.01959  | 26.54596  | 50.3091 | 2 | 15.659 | BB | 0.9352 | 947.23407  | 14.55627   | 49.6909 |
| 峰 #                                                                                                                                                                                   | 保留时间 [min]                                                                                                                                                                                                                                                                                                                                                                                                                                                                               | 类型  | 峰宽 [min]   | 峰面积 [mAU*s] | 峰高 [mAU]   | 峰面积 %       |          |       |   |        |    |        |            |           |         |   |        |    |        |            |            |         |
| 1                                                                                                                                                                                     | 9.032                                                                                                                                                                                                                                                                                                                                                                                                                                                                                    | BB  | 0.5235     | 959.01959   | 26.54596   | 50.3091     |          |       |   |        |    |        |            |           |         |   |        |    |        |            |            |         |
| 2                                                                                                                                                                                     | 15.659                                                                                                                                                                                                                                                                                                                                                                                                                                                                                   | BB  | 0.9352     | 947.23407   | 14.55627   | 49.6909     |          |       |   |        |    |        |            |           |         |   |        |    |        |            |            |         |
| <p>DAD1 B, Sig=254.4 Ref=off (E:\data\XWZMM1592A-GUAN 2020-11-24 10:21:29\002-P1-F1-XW530A.D)</p> 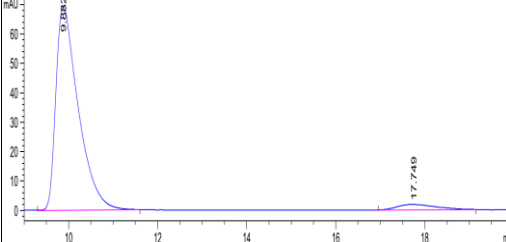 | <div>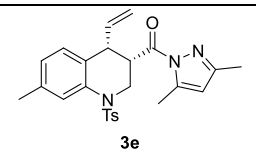<p><b>3e</b></p></div> <table><tr><th>峰 #</th><th>保留时间 [min]</th><th>类型</th><th>峰宽 [min]</th><th>峰面积 [mAU*s]</th><th>峰高 [mAU]</th><th>峰面积 %</th></tr><tr><td>1</td><td>9.882</td><td>BB</td><td>0.5159</td><td>2414.60815</td><td>69.40131</td><td>95.5199</td></tr><tr><td>2</td><td>17.749</td><td>BB</td><td>0.7243</td><td>113.25111</td><td>1.86551</td><td>4.4801</td></tr></table>       | 峰 # | 保留时间 [min] | 类型          | 峰宽 [min]   | 峰面积 [mAU*s] | 峰高 [mAU] | 峰面积 % | 1 | 9.882  | BB | 0.5159 | 2414.60815 | 69.40131  | 95.5199 | 2 | 17.749 | BB | 0.7243 | 113.25111  | 1.86551    | 4.4801  |
| 峰 #                                                                                                                                                                                   | 保留时间 [min]                                                                                                                                                                                                                                                                                                                                                                                                                                                                               | 类型  | 峰宽 [min]   | 峰面积 [mAU*s] | 峰高 [mAU]   | 峰面积 %       |          |       |   |        |    |        |            |           |         |   |        |    |        |            |            |         |
| 1                                                                                                                                                                                     | 9.882                                                                                                                                                                                                                                                                                                                                                                                                                                                                                    | BB  | 0.5159     | 2414.60815  | 69.40131   | 95.5199     |          |       |   |        |    |        |            |           |         |   |        |    |        |            |            |         |
| 2                                                                                                                                                                                     | 17.749                                                                                                                                                                                                                                                                                                                                                                                                                                                                                   | BB  | 0.7243     | 113.25111   | 1.86551    | 4.4801      |          |       |   |        |    |        |            |           |         |   |        |    |        |            |            |         |

| 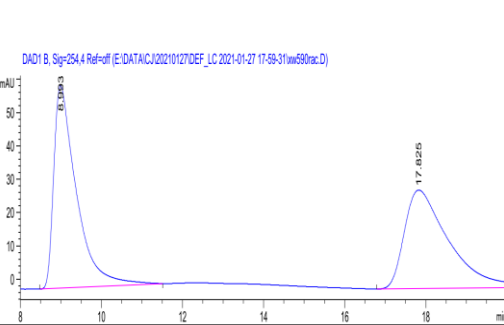 <p>DAD1 B, Sig=254.4 Ref=off (E:\data\LC\20210127\DEF_LC 2021-01-27 17:59-31\w590rac.D)</p> | 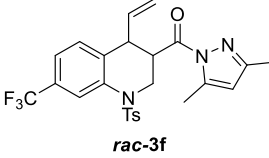 <p><b>rac-3f</b></p> <table><tr><th>峰 #</th><th>保留时间 [min]</th><th>类型</th><th>峰宽 [min]</th><th>峰面积 [mAU*s]</th><th>峰高 [mAU]</th><th>峰面积 %</th></tr><tr><td>1</td><td>8.993</td><td>BB</td><td>0.5531</td><td>2362.22217</td><td>60.81805</td><td>50.6583</td></tr><tr><td>2</td><td>17.825</td><td>BB</td><td>1.0697</td><td>2300.82935</td><td>29.57315</td><td>49.3417</td></tr></table>   | 峰 # | 保留时间 [min] | 类型          | 峰宽 [min]  | 峰面积 [mAU*s] | 峰高 [mAU] | 峰面积 % | 1 | 8.993  | BB | 0.5531 | 2362.22217 | 60.81805  | 50.6583 | 2 | 17.825 | BB | 1.0697 | 2300.82935 | 29.57315 | 49.3417 |
|-------------------------------------------------------------------------------------------------------------------------------------------------------------------------------|---------------------------------------------------------------------------------------------------------------------------------------------------------------------------------------------------------------------------------------------------------------------------------------------------------------------------------------------------------------------------------------------------------------------------------------------------------------------------------|-----|------------|-------------|-----------|-------------|----------|-------|---|--------|----|--------|------------|-----------|---------|---|--------|----|--------|------------|----------|---------|
| 峰 #                                                                                                                                                                           | 保留时间 [min]                                                                                                                                                                                                                                                                                                                                                                                                                                                                      | 类型  | 峰宽 [min]   | 峰面积 [mAU*s] | 峰高 [mAU]  | 峰面积 %       |          |       |   |        |    |        |            |           |         |   |        |    |        |            |          |         |
| 1                                                                                                                                                                             | 8.993                                                                                                                                                                                                                                                                                                                                                                                                                                                                           | BB  | 0.5531     | 2362.22217  | 60.81805  | 50.6583     |          |       |   |        |    |        |            |           |         |   |        |    |        |            |          |         |
| 2                                                                                                                                                                             | 17.825                                                                                                                                                                                                                                                                                                                                                                                                                                                                          | BB  | 1.0697     | 2300.82935  | 29.57315  | 49.3417     |          |       |   |        |    |        |            |           |         |   |        |    |        |            |          |         |
| 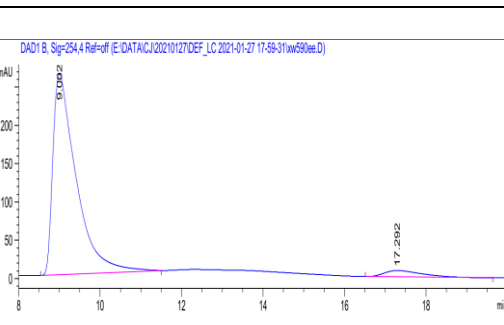 <p>DAD1 B, Sig=254.4 Ref=off (E:\data\LC\20210127\DEF_LC 2021-01-27 17:59-31\w590rac.D)</p> | 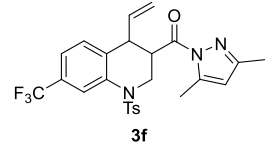 <p><b>3f</b></p> <table><tr><th>峰 #</th><th>保留时间 [min]</th><th>类型</th><th>峰宽 [min]</th><th>峰面积 [mAU*s]</th><th>峰高 [mAU]</th><th>峰面积 %</th></tr><tr><td>1</td><td>9.002</td><td>BB</td><td>0.5665</td><td>1.04195e4</td><td>261.72162</td><td>95.0986</td></tr><tr><td>2</td><td>17.292</td><td>BB</td><td>0.8339</td><td>537.02032</td><td>8.31027</td><td>4.9014</td></tr></table>          | 峰 # | 保留时间 [min] | 类型          | 峰宽 [min]  | 峰面积 [mAU*s] | 峰高 [mAU] | 峰面积 % | 1 | 9.002  | BB | 0.5665 | 1.04195e4  | 261.72162 | 95.0986 | 2 | 17.292 | BB | 0.8339 | 537.02032  | 8.31027  | 4.9014  |
| 峰 #                                                                                                                                                                           | 保留时间 [min]                                                                                                                                                                                                                                                                                                                                                                                                                                                                      | 类型  | 峰宽 [min]   | 峰面积 [mAU*s] | 峰高 [mAU]  | 峰面积 %       |          |       |   |        |    |        |            |           |         |   |        |    |        |            |          |         |
| 1                                                                                                                                                                             | 9.002                                                                                                                                                                                                                                                                                                                                                                                                                                                                           | BB  | 0.5665     | 1.04195e4   | 261.72162 | 95.0986     |          |       |   |        |    |        |            |           |         |   |        |    |        |            |          |         |
| 2                                                                                                                                                                             | 17.292                                                                                                                                                                                                                                                                                                                                                                                                                                                                          | BB  | 0.8339     | 537.02032   | 8.31027   | 4.9014      |          |       |   |        |    |        |            |           |         |   |        |    |        |            |          |         |
| 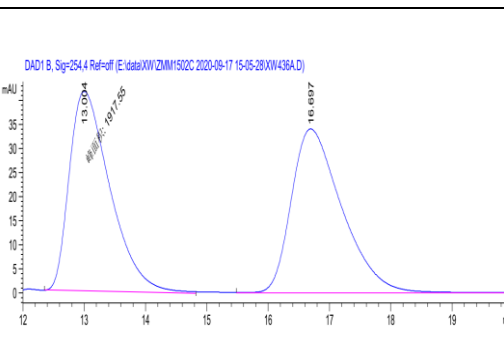 <p>DAD1 B, Sig=254.4 Ref=off (E:\data\XW\ZMM1502C 2020-09-17 15:05-29\XW436A.D)</p>        | 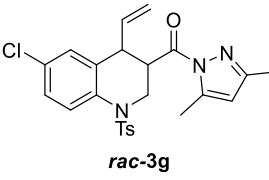 <p><b>rac-3g</b></p> <table><tr><th>峰 #</th><th>保留时间 [min]</th><th>类型</th><th>峰宽 [min]</th><th>峰面积 [mAU*s]</th><th>峰高 [mAU]</th><th>峰面积 %</th></tr><tr><td>1</td><td>13.004</td><td>MM</td><td>0.7698</td><td>1917.55054</td><td>41.51402</td><td>49.5223</td></tr><tr><td>2</td><td>16.697</td><td>VB</td><td>0.8647</td><td>1954.54114</td><td>34.10003</td><td>50.4777</td></tr></table> | 峰 # | 保留时间 [min] | 类型          | 峰宽 [min]  | 峰面积 [mAU*s] | 峰高 [mAU] | 峰面积 % | 1 | 13.004 | MM | 0.7698 | 1917.55054 | 41.51402  | 49.5223 | 2 | 16.697 | VB | 0.8647 | 1954.54114 | 34.10003 | 50.4777 |
| 峰 #                                                                                                                                                                           | 保留时间 [min]                                                                                                                                                                                                                                                                                                                                                                                                                                                                      | 类型  | 峰宽 [min]   | 峰面积 [mAU*s] | 峰高 [mAU]  | 峰面积 %       |          |       |   |        |    |        |            |           |         |   |        |    |        |            |          |         |
| 1                                                                                                                                                                             | 13.004                                                                                                                                                                                                                                                                                                                                                                                                                                                                          | MM  | 0.7698     | 1917.55054  | 41.51402  | 49.5223     |          |       |   |        |    |        |            |           |         |   |        |    |        |            |          |         |
| 2                                                                                                                                                                             | 16.697                                                                                                                                                                                                                                                                                                                                                                                                                                                                          | VB  | 0.8647     | 1954.54114  | 34.10003  | 50.4777     |          |       |   |        |    |        |            |           |         |   |        |    |        |            |          |         |
| 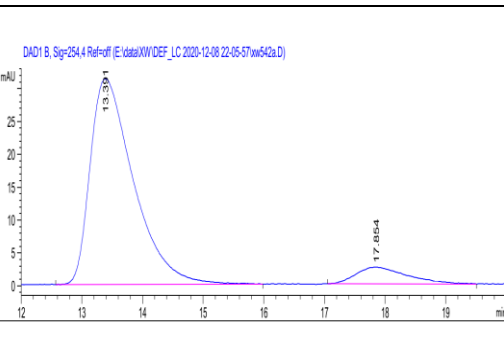 <p>DAD1 B, Sig=254.4 Ref=off (E:\data\XW\DEF_LC 2020-12-08 22:05-57\w542a.D)</p>          | 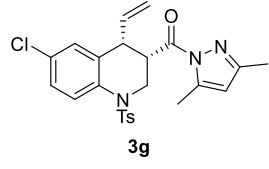 <p><b>3g</b></p> <table><tr><th>峰 #</th><th>保留时间 [min]</th><th>类型</th><th>峰宽 [min]</th><th>峰面积 [mAU*s]</th><th>峰高 [mAU]</th><th>峰面积 %</th></tr><tr><td>1</td><td>13.391</td><td>BB</td><td>0.7259</td><td>1556.65454</td><td>31.31947</td><td>91.2838</td></tr><tr><td>2</td><td>17.854</td><td>BB</td><td>0.6923</td><td>148.63721</td><td>2.56422</td><td>8.7162</td></tr></table>       | 峰 # | 保留时间 [min] | 类型          | 峰宽 [min]  | 峰面积 [mAU*s] | 峰高 [mAU] | 峰面积 % | 1 | 13.391 | BB | 0.7259 | 1556.65454 | 31.31947  | 91.2838 | 2 | 17.854 | BB | 0.6923 | 148.63721  | 2.56422  | 8.7162  |
| 峰 #                                                                                                                                                                           | 保留时间 [min]                                                                                                                                                                                                                                                                                                                                                                                                                                                                      | 类型  | 峰宽 [min]   | 峰面积 [mAU*s] | 峰高 [mAU]  | 峰面积 %       |          |       |   |        |    |        |            |           |         |   |        |    |        |            |          |         |
| 1                                                                                                                                                                             | 13.391                                                                                                                                                                                                                                                                                                                                                                                                                                                                          | BB  | 0.7259     | 1556.65454  | 31.31947  | 91.2838     |          |       |   |        |    |        |            |           |         |   |        |    |        |            |          |         |
| 2                                                                                                                                                                             | 17.854                                                                                                                                                                                                                                                                                                                                                                                                                                                                          | BB  | 0.6923     | 148.63721   | 2.56422   | 8.7162      |          |       |   |        |    |        |            |           |         |   |        |    |        |            |          |         |
| 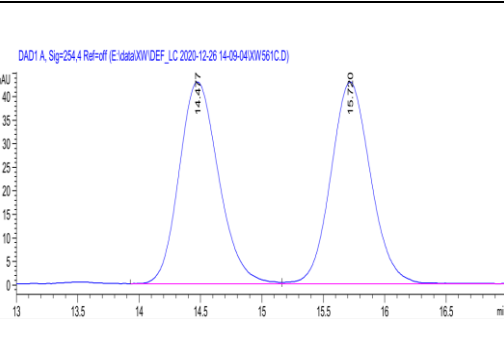 <p>DAD1 A, Sig=254.4 Ref=off (E:\data\XW\DEF_LC 2020-12-26 14:09-04\XW561C.D)</p>         | 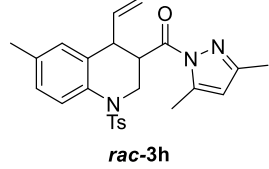 <p><b>rac-3h</b></p> <table><tr><th>峰 #</th><th>保留时间 [min]</th><th>类型</th><th>峰宽 [min]</th><th>峰面积 [mAU*s]</th><th>峰高 [mAU]</th><th>峰面积 %</th></tr><tr><td>1</td><td>14.477</td><td>BV</td><td>0.3493</td><td>961.94330</td><td>42.94325</td><td>49.8563</td></tr><tr><td>2</td><td>15.720</td><td>VB</td><td>0.3511</td><td>967.49030</td><td>42.90529</td><td>50.1437</td></tr></table>  | 峰 # | 保留时间 [min] | 类型          | 峰宽 [min]  | 峰面积 [mAU*s] | 峰高 [mAU] | 峰面积 % | 1 | 14.477 | BV | 0.3493 | 961.94330  | 42.94325  | 49.8563 | 2 | 15.720 | VB | 0.3511 | 967.49030  | 42.90529 | 50.1437 |
| 峰 #                                                                                                                                                                           | 保留时间 [min]                                                                                                                                                                                                                                                                                                                                                                                                                                                                      | 类型  | 峰宽 [min]   | 峰面积 [mAU*s] | 峰高 [mAU]  | 峰面积 %       |          |       |   |        |    |        |            |           |         |   |        |    |        |            |          |         |
| 1                                                                                                                                                                             | 14.477                                                                                                                                                                                                                                                                                                                                                                                                                                                                          | BV  | 0.3493     | 961.94330   | 42.94325  | 49.8563     |          |       |   |        |    |        |            |           |         |   |        |    |        |            |          |         |
| 2                                                                                                                                                                             | 15.720                                                                                                                                                                                                                                                                                                                                                                                                                                                                          | VB  | 0.3511     | 967.49030   | 42.90529  | 50.1437     |          |       |   |        |    |        |            |           |         |   |        |    |        |            |          |         |



| 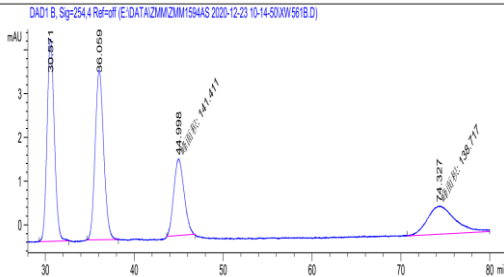 <p>DAD1 B, Sig=254.4 Ref=off (E:\DATA\ZMM\ZMM1504S 2020-12-23 10-14-50\XW561B.D)</p>          | <div>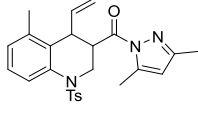<p><b>rac-3k</b></p></div> <table><tr><th>峰 #</th><th>保留时间 [min]</th><th>类型</th><th>峰宽 [min]</th><th>峰面积 [mAU*s]</th><th>峰高 [mAU]</th><th>峰面积 %</th></tr><tr><td>1</td><td>30.571</td><td>BB</td><td>0.8208</td><td>262.78906</td><td>4.62572</td><td>32.7611</td></tr><tr><td>2</td><td>36.059</td><td>BB</td><td>0.9746</td><td>259.21994</td><td>3.88433</td><td>32.3162</td></tr><tr><td>3</td><td>44.998</td><td>MM</td><td>1.3440</td><td>141.41104</td><td>1.75363</td><td>17.6293</td></tr><tr><td>4</td><td>74.327</td><td>MM</td><td>3.6325</td><td>138.71669</td><td>6.36470e-1</td><td>17.2934</td></tr></table> | 峰 # | 保留时间 [min] | 类型          | 峰宽 [min]   | 峰面积 [mAU*s] | 峰高 [mAU] | 峰面积 % | 1 | 30.571 | BB | 0.8208 | 262.78906  | 4.62572   | 32.7611 | 2 | 36.059 | BB | 0.9746 | 259.21994  | 3.88433  | 32.3162 | 3 | 44.998 | MM | 1.3440 | 141.41104  | 1.75363  | 17.6293 | 4 | 74.327 | MM | 3.6325 | 138.71669 | 6.36470e-1 | 17.2934 |
|---------------------------------------------------------------------------------------------------------------------------------------------------------------------------------|---------------------------------------------------------------------------------------------------------------------------------------------------------------------------------------------------------------------------------------------------------------------------------------------------------------------------------------------------------------------------------------------------------------------------------------------------------------------------------------------------------------------------------------------------------------------------------------------------------------------------------------------------------------------------------------------------------------------|-----|------------|-------------|------------|-------------|----------|-------|---|--------|----|--------|------------|-----------|---------|---|--------|----|--------|------------|----------|---------|---|--------|----|--------|------------|----------|---------|---|--------|----|--------|-----------|------------|---------|
| 峰 #                                                                                                                                                                             | 保留时间 [min]                                                                                                                                                                                                                                                                                                                                                                                                                                                                                                                                                                                                                                                                                                          | 类型  | 峰宽 [min]   | 峰面积 [mAU*s] | 峰高 [mAU]   | 峰面积 %       |          |       |   |        |    |        |            |           |         |   |        |    |        |            |          |         |   |        |    |        |            |          |         |   |        |    |        |           |            |         |
| 1                                                                                                                                                                               | 30.571                                                                                                                                                                                                                                                                                                                                                                                                                                                                                                                                                                                                                                                                                                              | BB  | 0.8208     | 262.78906   | 4.62572    | 32.7611     |          |       |   |        |    |        |            |           |         |   |        |    |        |            |          |         |   |        |    |        |            |          |         |   |        |    |        |           |            |         |
| 2                                                                                                                                                                               | 36.059                                                                                                                                                                                                                                                                                                                                                                                                                                                                                                                                                                                                                                                                                                              | BB  | 0.9746     | 259.21994   | 3.88433    | 32.3162     |          |       |   |        |    |        |            |           |         |   |        |    |        |            |          |         |   |        |    |        |            |          |         |   |        |    |        |           |            |         |
| 3                                                                                                                                                                               | 44.998                                                                                                                                                                                                                                                                                                                                                                                                                                                                                                                                                                                                                                                                                                              | MM  | 1.3440     | 141.41104   | 1.75363    | 17.6293     |          |       |   |        |    |        |            |           |         |   |        |    |        |            |          |         |   |        |    |        |            |          |         |   |        |    |        |           |            |         |
| 4                                                                                                                                                                               | 74.327                                                                                                                                                                                                                                                                                                                                                                                                                                                                                                                                                                                                                                                                                                              | MM  | 3.6325     | 138.71669   | 6.36470e-1 | 17.2934     |          |       |   |        |    |        |            |           |         |   |        |    |        |            |          |         |   |        |    |        |            |          |         |   |        |    |        |           |            |         |
| 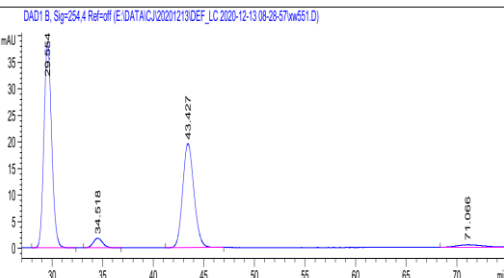 <p>DAD1 B, Sig=254.4 Ref=off (E:\DATA\LC\20201213\DEF_LC 2020-12-13 08-28-57\w551.D)</p>      | <div>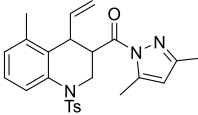<p><b>3k</b></p></div> <table><tr><th>峰 #</th><th>保留时间 [min]</th><th>类型</th><th>峰宽 [min]</th><th>峰面积 [mAU*s]</th><th>峰高 [mAU]</th><th>峰面积 %</th></tr><tr><td>1</td><td>29.554</td><td>BB</td><td>0.8221</td><td>2046.38477</td><td>38.62733</td><td>54.3311</td></tr><tr><td>2</td><td>34.518</td><td>BB</td><td>0.9357</td><td>116.26343</td><td>1.80448</td><td>3.0868</td></tr><tr><td>3</td><td>43.427</td><td>BB</td><td>1.2185</td><td>1521.61060</td><td>19.58356</td><td>40.3985</td></tr><tr><td>4</td><td>71.066</td><td>BB</td><td>2.0915</td><td>82.24789</td><td>4.62332e-1</td><td>2.1837</td></tr></table>    | 峰 # | 保留时间 [min] | 类型          | 峰宽 [min]   | 峰面积 [mAU*s] | 峰高 [mAU] | 峰面积 % | 1 | 29.554 | BB | 0.8221 | 2046.38477 | 38.62733  | 54.3311 | 2 | 34.518 | BB | 0.9357 | 116.26343  | 1.80448  | 3.0868  | 3 | 43.427 | BB | 1.2185 | 1521.61060 | 19.58356 | 40.3985 | 4 | 71.066 | BB | 2.0915 | 82.24789  | 4.62332e-1 | 2.1837  |
| 峰 #                                                                                                                                                                             | 保留时间 [min]                                                                                                                                                                                                                                                                                                                                                                                                                                                                                                                                                                                                                                                                                                          | 类型  | 峰宽 [min]   | 峰面积 [mAU*s] | 峰高 [mAU]   | 峰面积 %       |          |       |   |        |    |        |            |           |         |   |        |    |        |            |          |         |   |        |    |        |            |          |         |   |        |    |        |           |            |         |
| 1                                                                                                                                                                               | 29.554                                                                                                                                                                                                                                                                                                                                                                                                                                                                                                                                                                                                                                                                                                              | BB  | 0.8221     | 2046.38477  | 38.62733   | 54.3311     |          |       |   |        |    |        |            |           |         |   |        |    |        |            |          |         |   |        |    |        |            |          |         |   |        |    |        |           |            |         |
| 2                                                                                                                                                                               | 34.518                                                                                                                                                                                                                                                                                                                                                                                                                                                                                                                                                                                                                                                                                                              | BB  | 0.9357     | 116.26343   | 1.80448    | 3.0868      |          |       |   |        |    |        |            |           |         |   |        |    |        |            |          |         |   |        |    |        |            |          |         |   |        |    |        |           |            |         |
| 3                                                                                                                                                                               | 43.427                                                                                                                                                                                                                                                                                                                                                                                                                                                                                                                                                                                                                                                                                                              | BB  | 1.2185     | 1521.61060  | 19.58356   | 40.3985     |          |       |   |        |    |        |            |           |         |   |        |    |        |            |          |         |   |        |    |        |            |          |         |   |        |    |        |           |            |         |
| 4                                                                                                                                                                               | 71.066                                                                                                                                                                                                                                                                                                                                                                                                                                                                                                                                                                                                                                                                                                              | BB  | 2.0915     | 82.24789    | 4.62332e-1 | 2.1837      |          |       |   |        |    |        |            |           |         |   |        |    |        |            |          |         |   |        |    |        |            |          |         |   |        |    |        |           |            |         |
| 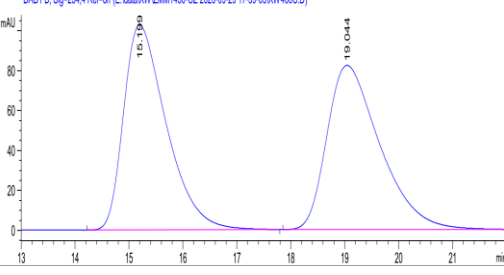 <p>DAD1 B, Sig=254.4 Ref=off (E:\data\XW\ZMM1430-QZ 2020-09-29 17-39-03\XW460C.D)</p>        | <div>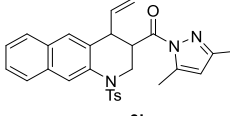<p><b>rac-3l</b></p></div> <table><tr><th>峰 #</th><th>保留时间 [min]</th><th>类型</th><th>峰宽 [min]</th><th>峰面积 [mAU*s]</th><th>峰高 [mAU]</th><th>峰面积 %</th></tr><tr><td>1</td><td>15.199</td><td>BB</td><td>0.8319</td><td>5647.47656</td><td>102.63880</td><td>50.0624</td></tr><tr><td>2</td><td>19.044</td><td>BB</td><td>1.0136</td><td>5633.40918</td><td>82.19961</td><td>49.9376</td></tr></table>                                                                                                                                                                                                                          | 峰 # | 保留时间 [min] | 类型          | 峰宽 [min]   | 峰面积 [mAU*s] | 峰高 [mAU] | 峰面积 % | 1 | 15.199 | BB | 0.8319 | 5647.47656 | 102.63880 | 50.0624 | 2 | 19.044 | BB | 1.0136 | 5633.40918 | 82.19961 | 49.9376 |   |        |    |        |            |          |         |   |        |    |        |           |            |         |
| 峰 #                                                                                                                                                                             | 保留时间 [min]                                                                                                                                                                                                                                                                                                                                                                                                                                                                                                                                                                                                                                                                                                          | 类型  | 峰宽 [min]   | 峰面积 [mAU*s] | 峰高 [mAU]   | 峰面积 %       |          |       |   |        |    |        |            |           |         |   |        |    |        |            |          |         |   |        |    |        |            |          |         |   |        |    |        |           |            |         |
| 1                                                                                                                                                                               | 15.199                                                                                                                                                                                                                                                                                                                                                                                                                                                                                                                                                                                                                                                                                                              | BB  | 0.8319     | 5647.47656  | 102.63880  | 50.0624     |          |       |   |        |    |        |            |           |         |   |        |    |        |            |          |         |   |        |    |        |            |          |         |   |        |    |        |           |            |         |
| 2                                                                                                                                                                               | 19.044                                                                                                                                                                                                                                                                                                                                                                                                                                                                                                                                                                                                                                                                                                              | BB  | 1.0136     | 5633.40918  | 82.19961   | 49.9376     |          |       |   |        |    |        |            |           |         |   |        |    |        |            |          |         |   |        |    |        |            |          |         |   |        |    |        |           |            |         |
| 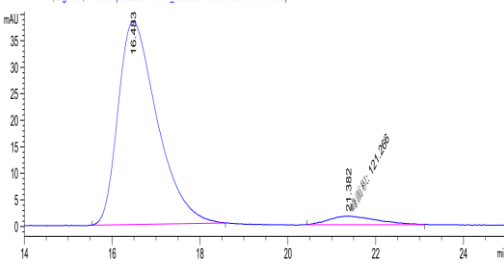 <p>DAD1 B, Sig=254.4 Ref=off (E:\data\XW\DEF_LC 2020-12-08 22-05-57\w542c.D)</p>            | <div>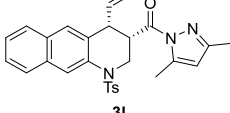<p><b>3l</b></p></div> <table><tr><th>峰 #</th><th>保留时间 [min]</th><th>类型</th><th>峰宽 [min]</th><th>峰面积 [mAU*s]</th><th>峰高 [mAU]</th><th>峰面积 %</th></tr><tr><td>1</td><td>16.483</td><td>BB</td><td>0.8471</td><td>2361.26465</td><td>38.30870</td><td>95.1152</td></tr><tr><td>2</td><td>21.382</td><td>MM</td><td>1.2406</td><td>121.26585</td><td>1.62911</td><td>4.8848</td></tr></table>                                                                                                                                                                                                                                 | 峰 # | 保留时间 [min] | 类型          | 峰宽 [min]   | 峰面积 [mAU*s] | 峰高 [mAU] | 峰面积 % | 1 | 16.483 | BB | 0.8471 | 2361.26465 | 38.30870  | 95.1152 | 2 | 21.382 | MM | 1.2406 | 121.26585  | 1.62911  | 4.8848  |   |        |    |        |            |          |         |   |        |    |        |           |            |         |
| 峰 #                                                                                                                                                                             | 保留时间 [min]                                                                                                                                                                                                                                                                                                                                                                                                                                                                                                                                                                                                                                                                                                          | 类型  | 峰宽 [min]   | 峰面积 [mAU*s] | 峰高 [mAU]   | 峰面积 %       |          |       |   |        |    |        |            |           |         |   |        |    |        |            |          |         |   |        |    |        |            |          |         |   |        |    |        |           |            |         |
| 1                                                                                                                                                                               | 16.483                                                                                                                                                                                                                                                                                                                                                                                                                                                                                                                                                                                                                                                                                                              | BB  | 0.8471     | 2361.26465  | 38.30870   | 95.1152     |          |       |   |        |    |        |            |           |         |   |        |    |        |            |          |         |   |        |    |        |            |          |         |   |        |    |        |           |            |         |
| 2                                                                                                                                                                               | 21.382                                                                                                                                                                                                                                                                                                                                                                                                                                                                                                                                                                                                                                                                                                              | MM  | 1.2406     | 121.26585   | 1.62911    | 4.8848      |          |       |   |        |    |        |            |           |         |   |        |    |        |            |          |         |   |        |    |        |            |          |         |   |        |    |        |           |            |         |
| 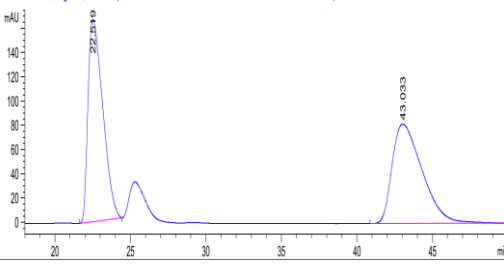 <p>DAD1 D, Sig=230.4 Ref=off (E:\data\ZQL\ZMM1508A1 2020-09-15 08-05-33\XW431B A890D.D)</p> | <div>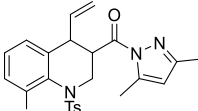<p><b>rac-3m</b></p></div> <table><tr><th>峰 #</th><th>保留时间 [min]</th><th>类型</th><th>峰宽 [min]</th><th>峰面积 [mAU*s]</th><th>峰高 [mAU]</th><th>峰面积 %</th></tr><tr><td>1</td><td>22.519</td><td>BB</td><td>1.0475</td><td>1.13193e4</td><td>166.43382</td><td>49.8852</td></tr><tr><td>2</td><td>43.033</td><td>BB</td><td>1.8951</td><td>1.13714e4</td><td>82.03735</td><td>50.1148</td></tr></table>                                                                                                                                                                                                                           | 峰 # | 保留时间 [min] | 类型          | 峰宽 [min]   | 峰面积 [mAU*s] | 峰高 [mAU] | 峰面积 % | 1 | 22.519 | BB | 1.0475 | 1.13193e4  | 166.43382 | 49.8852 | 2 | 43.033 | BB | 1.8951 | 1.13714e4  | 82.03735 | 50.1148 |   |        |    |        |            |          |         |   |        |    |        |           |            |         |
| 峰 #                                                                                                                                                                             | 保留时间 [min]                                                                                                                                                                                                                                                                                                                                                                                                                                                                                                                                                                                                                                                                                                          | 类型  | 峰宽 [min]   | 峰面积 [mAU*s] | 峰高 [mAU]   | 峰面积 %       |          |       |   |        |    |        |            |           |         |   |        |    |        |            |          |         |   |        |    |        |            |          |         |   |        |    |        |           |            |         |
| 1                                                                                                                                                                               | 22.519                                                                                                                                                                                                                                                                                                                                                                                                                                                                                                                                                                                                                                                                                                              | BB  | 1.0475     | 1.13193e4   | 166.43382  | 49.8852     |          |       |   |        |    |        |            |           |         |   |        |    |        |            |          |         |   |        |    |        |            |          |         |   |        |    |        |           |            |         |
| 2                                                                                                                                                                               | 43.033                                                                                                                                                                                                                                                                                                                                                                                                                                                                                                                                                                                                                                                                                                              | BB  | 1.8951     | 1.13714e4   | 82.03735   | 50.1148     |          |       |   |        |    |        |            |           |         |   |        |    |        |            |          |         |   |        |    |        |            |          |         |   |        |    |        |           |            |         |

| <p>DAD1 B, Sig=254.4 Ref=off (E:\data\OLZMM1502C1 2020-08-19 10-48-35\XW441B.D)</p>      | <div><chem>Cc1cc(C(=O)N2Cc3cc(F)ccc3N2C=C)cnn1</chem><p><b>3m</b></p></div> <table><tr><th>峰 #</th><th>保留时间 [min]</th><th>类型</th><th>峰宽 [min]</th><th>峰面积 [mAU*s]</th><th>峰高 [mAU]</th><th>峰面积 %</th></tr><tr><td>1</td><td>21.646</td><td>MM</td><td>1.1355</td><td>4.62853e4</td><td>679.38843</td><td>95.1229</td></tr><tr><td>2</td><td>42.778</td><td>BB</td><td>1.6174</td><td>2373.11743</td><td>17.20288</td><td>4.8771</td></tr></table>                                                                                                                                                                                                                                | 峰 # | 保留时间 [min] | 类型          | 峰宽 [min]  | 峰面积 [mAU*s] | 峰高 [mAU] | 峰面积 % | 1 | 21.646 | MM | 1.1355 | 4.62853e4  | 679.38843 | 95.1229 | 2 | 42.778 | BB | 1.6174 | 2373.11743 | 17.20288 | 4.8771  |   |        |    |        |            |          |         |   |        |    |        |           |         |        |
|------------------------------------------------------------------------------------------|----------------------------------------------------------------------------------------------------------------------------------------------------------------------------------------------------------------------------------------------------------------------------------------------------------------------------------------------------------------------------------------------------------------------------------------------------------------------------------------------------------------------------------------------------------------------------------------------------------------------------------------------------------------------------------|-----|------------|-------------|-----------|-------------|----------|-------|---|--------|----|--------|------------|-----------|---------|---|--------|----|--------|------------|----------|---------|---|--------|----|--------|------------|----------|---------|---|--------|----|--------|-----------|---------|--------|
| 峰 #                                                                                      | 保留时间 [min]                                                                                                                                                                                                                                                                                                                                                                                                                                                                                                                                                                                                                                                                       | 类型  | 峰宽 [min]   | 峰面积 [mAU*s] | 峰高 [mAU]  | 峰面积 %       |          |       |   |        |    |        |            |           |         |   |        |    |        |            |          |         |   |        |    |        |            |          |         |   |        |    |        |           |         |        |
| 1                                                                                        | 21.646                                                                                                                                                                                                                                                                                                                                                                                                                                                                                                                                                                                                                                                                           | MM  | 1.1355     | 4.62853e4   | 679.38843 | 95.1229     |          |       |   |        |    |        |            |           |         |   |        |    |        |            |          |         |   |        |    |        |            |          |         |   |        |    |        |           |         |        |
| 2                                                                                        | 42.778                                                                                                                                                                                                                                                                                                                                                                                                                                                                                                                                                                                                                                                                           | BB  | 1.6174     | 2373.11743  | 17.20288  | 4.8771      |          |       |   |        |    |        |            |           |         |   |        |    |        |            |          |         |   |        |    |        |            |          |         |   |        |    |        |           |         |        |
| <p>DAD1 A, Sig=254.4 Ref=off (E:\data\XWZMM1507B 2020-09-15 18-47-14\XW42699.5A.Z.D)</p> | <div><chem>Cc1cc(C(=O)N2Cc3cc(C)ccc3N2C=C)cnn1</chem><p><b>rac-3n</b></p></div> <table><tr><th>峰 #</th><th>保留时间 [min]</th><th>类型</th><th>峰宽 [min]</th><th>峰面积 [mAU*s]</th><th>峰高 [mAU]</th><th>峰面积 %</th></tr><tr><td>1</td><td>60.554</td><td>BB</td><td>1.1650</td><td>2618.62305</td><td>28.31404</td><td>40.8161</td></tr><tr><td>2</td><td>65.342</td><td>BB</td><td>1.0584</td><td>584.92310</td><td>6.55886</td><td>9.1171</td></tr><tr><td>3</td><td>71.530</td><td>BB</td><td>1.2641</td><td>2603.64966</td><td>26.22963</td><td>40.5827</td></tr><tr><td>4</td><td>89.491</td><td>MM</td><td>4.8705</td><td>608.46796</td><td>2.08217</td><td>9.4841</td></tr></table> | 峰 # | 保留时间 [min] | 类型          | 峰宽 [min]  | 峰面积 [mAU*s] | 峰高 [mAU] | 峰面积 % | 1 | 60.554 | BB | 1.1650 | 2618.62305 | 28.31404  | 40.8161 | 2 | 65.342 | BB | 1.0584 | 584.92310  | 6.55886  | 9.1171  | 3 | 71.530 | BB | 1.2641 | 2603.64966 | 26.22963 | 40.5827 | 4 | 89.491 | MM | 4.8705 | 608.46796 | 2.08217 | 9.4841 |
| 峰 #                                                                                      | 保留时间 [min]                                                                                                                                                                                                                                                                                                                                                                                                                                                                                                                                                                                                                                                                       | 类型  | 峰宽 [min]   | 峰面积 [mAU*s] | 峰高 [mAU]  | 峰面积 %       |          |       |   |        |    |        |            |           |         |   |        |    |        |            |          |         |   |        |    |        |            |          |         |   |        |    |        |           |         |        |
| 1                                                                                        | 60.554                                                                                                                                                                                                                                                                                                                                                                                                                                                                                                                                                                                                                                                                           | BB  | 1.1650     | 2618.62305  | 28.31404  | 40.8161     |          |       |   |        |    |        |            |           |         |   |        |    |        |            |          |         |   |        |    |        |            |          |         |   |        |    |        |           |         |        |
| 2                                                                                        | 65.342                                                                                                                                                                                                                                                                                                                                                                                                                                                                                                                                                                                                                                                                           | BB  | 1.0584     | 584.92310   | 6.55886   | 9.1171      |          |       |   |        |    |        |            |           |         |   |        |    |        |            |          |         |   |        |    |        |            |          |         |   |        |    |        |           |         |        |
| 3                                                                                        | 71.530                                                                                                                                                                                                                                                                                                                                                                                                                                                                                                                                                                                                                                                                           | BB  | 1.2641     | 2603.64966  | 26.22963  | 40.5827     |          |       |   |        |    |        |            |           |         |   |        |    |        |            |          |         |   |        |    |        |            |          |         |   |        |    |        |           |         |        |
| 4                                                                                        | 89.491                                                                                                                                                                                                                                                                                                                                                                                                                                                                                                                                                                                                                                                                           | MM  | 4.8705     | 608.46796   | 2.08217   | 9.4841      |          |       |   |        |    |        |            |           |         |   |        |    |        |            |          |         |   |        |    |        |            |          |         |   |        |    |        |           |         |        |
| <p>DAD1 A, Sig=254.4 Ref=off (E:\data\XWZMM1507B 2020-09-15 18-47-14\XW4269A.D)</p>      | <div><chem>Cc1cc(C(=O)N2Cc3cc(C)ccc3N2C=C)cnn1</chem><p><b>3n</b></p></div> <table><tr><th>峰 #</th><th>保留时间 [min]</th><th>类型</th><th>峰宽 [min]</th><th>峰面积 [mAU*s]</th><th>峰高 [mAU]</th><th>峰面积 %</th></tr><tr><td>1</td><td>60.502</td><td>BB</td><td>1.0553</td><td>800.24365</td><td>8.93162</td><td>14.1629</td></tr><tr><td>2</td><td>71.217</td><td>BB</td><td>1.4220</td><td>4850.03076</td><td>48.77853</td><td>85.8371</td></tr></table>                                                                                                                                                                                                                                 | 峰 # | 保留时间 [min] | 类型          | 峰宽 [min]  | 峰面积 [mAU*s] | 峰高 [mAU] | 峰面积 % | 1 | 60.502 | BB | 1.0553 | 800.24365  | 8.93162   | 14.1629 | 2 | 71.217 | BB | 1.4220 | 4850.03076 | 48.77853 | 85.8371 |   |        |    |        |            |          |         |   |        |    |        |           |         |        |
| 峰 #                                                                                      | 保留时间 [min]                                                                                                                                                                                                                                                                                                                                                                                                                                                                                                                                                                                                                                                                       | 类型  | 峰宽 [min]   | 峰面积 [mAU*s] | 峰高 [mAU]  | 峰面积 %       |          |       |   |        |    |        |            |           |         |   |        |    |        |            |          |         |   |        |    |        |            |          |         |   |        |    |        |           |         |        |
| 1                                                                                        | 60.502                                                                                                                                                                                                                                                                                                                                                                                                                                                                                                                                                                                                                                                                           | BB  | 1.0553     | 800.24365   | 8.93162   | 14.1629     |          |       |   |        |    |        |            |           |         |   |        |    |        |            |          |         |   |        |    |        |            |          |         |   |        |    |        |           |         |        |
| 2                                                                                        | 71.217                                                                                                                                                                                                                                                                                                                                                                                                                                                                                                                                                                                                                                                                           | BB  | 1.4220     | 4850.03076  | 48.77853  | 85.8371     |          |       |   |        |    |        |            |           |         |   |        |    |        |            |          |         |   |        |    |        |            |          |         |   |        |    |        |           |         |        |
| <p>DAD1 A, Sig=254.4 Ref=off (E:\data\YFDEF_LC 2021-01-17 12-52-49\XW465RAC.D)</p>       | <div><chem>CCOC(=O)C1Cc2ccccc2N1Cc3cc(C)ccc3</chem><p><b>rac-5</b></p></div> <table><tr><th>峰 #</th><th>保留时间 [min]</th><th>类型</th><th>峰宽 [min]</th><th>峰面积 [mAU*s]</th><th>峰高 [mAU]</th><th>峰面积 %</th></tr><tr><td>1</td><td>21.002</td><td>BB</td><td>0.4301</td><td>2969.31909</td><td>105.59761</td><td>49.8328</td></tr><tr><td>2</td><td>24.080</td><td>BB</td><td>0.4824</td><td>2989.24072</td><td>94.15453</td><td>50.1672</td></tr></table>                                                                                                                                                                                                                             | 峰 # | 保留时间 [min] | 类型          | 峰宽 [min]  | 峰面积 [mAU*s] | 峰高 [mAU] | 峰面积 % | 1 | 21.002 | BB | 0.4301 | 2969.31909 | 105.59761 | 49.8328 | 2 | 24.080 | BB | 0.4824 | 2989.24072 | 94.15453 | 50.1672 |   |        |    |        |            |          |         |   |        |    |        |           |         |        |
| 峰 #                                                                                      | 保留时间 [min]                                                                                                                                                                                                                                                                                                                                                                                                                                                                                                                                                                                                                                                                       | 类型  | 峰宽 [min]   | 峰面积 [mAU*s] | 峰高 [mAU]  | 峰面积 %       |          |       |   |        |    |        |            |           |         |   |        |    |        |            |          |         |   |        |    |        |            |          |         |   |        |    |        |           |         |        |
| 1                                                                                        | 21.002                                                                                                                                                                                                                                                                                                                                                                                                                                                                                                                                                                                                                                                                           | BB  | 0.4301     | 2969.31909  | 105.59761 | 49.8328     |          |       |   |        |    |        |            |           |         |   |        |    |        |            |          |         |   |        |    |        |            |          |         |   |        |    |        |           |         |        |
| 2                                                                                        | 24.080                                                                                                                                                                                                                                                                                                                                                                                                                                                                                                                                                                                                                                                                           | BB  | 0.4824     | 2989.24072  | 94.15453  | 50.1672     |          |       |   |        |    |        |            |           |         |   |        |    |        |            |          |         |   |        |    |        |            |          |         |   |        |    |        |           |         |        |
| <p>DAD1 A, Sig=254.4 Ref=off (E:\data\YFDEF_LC 2021-01-17 12-52-49\XW465E.D)</p>         | <div><chem>CCOC(=O)[C@H]1Cc2ccccc2N1Cc3cc(C)ccc3</chem><p><b>5</b></p></div> <table><tr><th>峰 #</th><th>保留时间 [min]</th><th>类型</th><th>峰宽 [min]</th><th>峰面积 [mAU*s]</th><th>峰高 [mAU]</th><th>峰面积 %</th></tr><tr><td>1</td><td>22.149</td><td>BB</td><td>0.3626</td><td>69.42024</td><td>2.32313</td><td>3.8555</td></tr><tr><td>2</td><td>25.450</td><td>BB</td><td>0.5179</td><td>1731.12390</td><td>50.50021</td><td>96.1445</td></tr></table>                                                                                                                                                                                                                                  | 峰 # | 保留时间 [min] | 类型          | 峰宽 [min]  | 峰面积 [mAU*s] | 峰高 [mAU] | 峰面积 % | 1 | 22.149 | BB | 0.3626 | 69.42024   | 2.32313   | 3.8555  | 2 | 25.450 | BB | 0.5179 | 1731.12390 | 50.50021 | 96.1445 |   |        |    |        |            |          |         |   |        |    |        |           |         |        |
| 峰 #                                                                                      | 保留时间 [min]                                                                                                                                                                                                                                                                                                                                                                                                                                                                                                                                                                                                                                                                       | 类型  | 峰宽 [min]   | 峰面积 [mAU*s] | 峰高 [mAU]  | 峰面积 %       |          |       |   |        |    |        |            |           |         |   |        |    |        |            |          |         |   |        |    |        |            |          |         |   |        |    |        |           |         |        |
| 1                                                                                        | 22.149                                                                                                                                                                                                                                                                                                                                                                                                                                                                                                                                                                                                                                                                           | BB  | 0.3626     | 69.42024    | 2.32313   | 3.8555      |          |       |   |        |    |        |            |           |         |   |        |    |        |            |          |         |   |        |    |        |            |          |         |   |        |    |        |           |         |        |
| 2                                                                                        | 25.450                                                                                                                                                                                                                                                                                                                                                                                                                                                                                                                                                                                                                                                                           | BB  | 0.5179     | 1731.12390  | 50.50021  | 96.1445     |          |       |   |        |    |        |            |           |         |   |        |    |        |            |          |         |   |        |    |        |            |          |         |   |        |    |        |           |         |        |

| 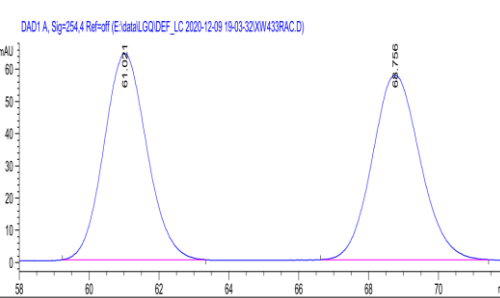 <p>DAD1 A, Sig=254.4 Ref=off (E:\data\LCQDEF_LC 2020-12-09 19-03-32\XW433RAC.D)</p>   | 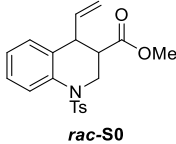 <p><b>rac-S0</b></p> <table><tr><th>峰 #</th><th>保留时间 [min]</th><th>类型</th><th>峰宽 [min]</th><th>峰面积 [mAU*s]</th><th>峰高 [mAU]</th><th>峰面积 %</th></tr><tr><td>1</td><td>61.021</td><td>BB</td><td>1.1401</td><td>5460.07080</td><td>64.08046</td><td>49.9136</td></tr><tr><td>2</td><td>68.756</td><td>BB</td><td>1.1802</td><td>5478.97070</td><td>57.26724</td><td>50.0864</td></tr></table>  | 峰 #  | 保留时间 [min] | 类型          | 峰宽 [min]   | 峰面积 [mAU*s] | 峰高 [mAU] | 峰面积 % | 1 | 61.021 | BB   | 1.1401 | 5460.07080 | 64.08046   | 49.9136 | 2 | 68.756 | BB   | 1.1802 | 5478.97070 | 57.26724   | 50.0864 |
|-------------------------------------------------------------------------------------------------------------------------------------------------------------------------|---------------------------------------------------------------------------------------------------------------------------------------------------------------------------------------------------------------------------------------------------------------------------------------------------------------------------------------------------------------------------------------------------------------------------------------------------------------------------------|------|------------|-------------|------------|-------------|----------|-------|---|--------|------|--------|------------|------------|---------|---|--------|------|--------|------------|------------|---------|
| 峰 #                                                                                                                                                                     | 保留时间 [min]                                                                                                                                                                                                                                                                                                                                                                                                                                                                      | 类型   | 峰宽 [min]   | 峰面积 [mAU*s] | 峰高 [mAU]   | 峰面积 %       |          |       |   |        |      |        |            |            |         |   |        |      |        |            |            |         |
| 1                                                                                                                                                                       | 61.021                                                                                                                                                                                                                                                                                                                                                                                                                                                                          | BB   | 1.1401     | 5460.07080  | 64.08046   | 49.9136     |          |       |   |        |      |        |            |            |         |   |        |      |        |            |            |         |
| 2                                                                                                                                                                       | 68.756                                                                                                                                                                                                                                                                                                                                                                                                                                                                          | BB   | 1.1802     | 5478.97070  | 57.26724   | 50.0864     |          |       |   |        |      |        |            |            |         |   |        |      |        |            |            |         |
| 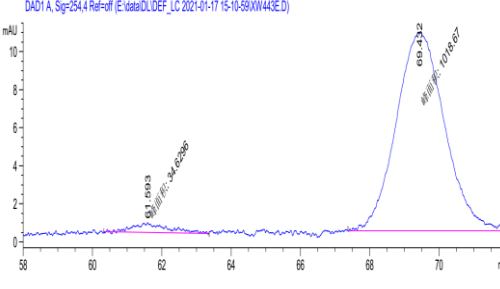 <p>DAD1 A, Sig=254.4 Ref=off (E:\data\LCQDEF_LC 2021-01-17 15-10-59\XW443E.D)</p>     | 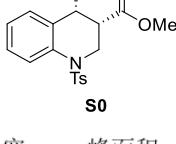 <p><b>S0</b></p> <table><tr><th>峰 #</th><th>保留时间 [min]</th><th>类型</th><th>峰宽 [min]</th><th>峰面积 [mAU*s]</th><th>峰高 [mAU]</th><th>峰面积 %</th></tr><tr><td>1</td><td>61.593</td><td>MM</td><td>1.1341</td><td>34.62959</td><td>5.08932e-1</td><td>3.2877</td></tr><tr><td>2</td><td>69.432</td><td>MM</td><td>1.6300</td><td>1018.66595</td><td>10.41585</td><td>96.7123</td></tr></table>       | 峰 #  | 保留时间 [min] | 类型          | 峰宽 [min]   | 峰面积 [mAU*s] | 峰高 [mAU] | 峰面积 % | 1 | 61.593 | MM   | 1.1341 | 34.62959   | 5.08932e-1 | 3.2877  | 2 | 69.432 | MM   | 1.6300 | 1018.66595 | 10.41585   | 96.7123 |
| 峰 #                                                                                                                                                                     | 保留时间 [min]                                                                                                                                                                                                                                                                                                                                                                                                                                                                      | 类型   | 峰宽 [min]   | 峰面积 [mAU*s] | 峰高 [mAU]   | 峰面积 %       |          |       |   |        |      |        |            |            |         |   |        |      |        |            |            |         |
| 1                                                                                                                                                                       | 61.593                                                                                                                                                                                                                                                                                                                                                                                                                                                                          | MM   | 1.1341     | 34.62959    | 5.08932e-1 | 3.2877      |          |       |   |        |      |        |            |            |         |   |        |      |        |            |            |         |
| 2                                                                                                                                                                       | 69.432                                                                                                                                                                                                                                                                                                                                                                                                                                                                          | MM   | 1.6300     | 1018.66595  | 10.41585   | 96.7123     |          |       |   |        |      |        |            |            |         |   |        |      |        |            |            |         |
| 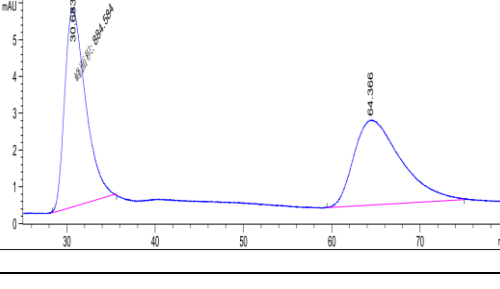 <p>DAD1 A, Sig=254.4 Ref=off (E:\data\XWDEF_LC 2021-01-28 09-32-34\XW58rac-2.D)</p>  | 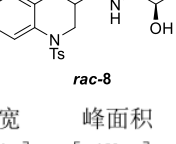 <p><b>rac-8</b></p> <table><tr><th>峰 #</th><th>保留时间 [min]</th><th>类型</th><th>峰宽 [min]</th><th>峰面积 [mAU*s]</th><th>峰高 [mAU]</th><th>峰面积 %</th></tr><tr><td>1</td><td>30.683</td><td>MM</td><td>2.7329</td><td>884.58423</td><td>5.39467</td><td>50.8366</td></tr><tr><td>2</td><td>64.366</td><td>BB</td><td>4.3490</td><td>855.46838</td><td>2.31189</td><td>49.1634</td></tr></table>      | 峰 #  | 保留时间 [min] | 类型          | 峰宽 [min]   | 峰面积 [mAU*s] | 峰高 [mAU] | 峰面积 % | 1 | 30.683 | MM   | 2.7329 | 884.58423  | 5.39467    | 50.8366 | 2 | 64.366 | BB   | 4.3490 | 855.46838  | 2.31189    | 49.1634 |
| 峰 #                                                                                                                                                                     | 保留时间 [min]                                                                                                                                                                                                                                                                                                                                                                                                                                                                      | 类型   | 峰宽 [min]   | 峰面积 [mAU*s] | 峰高 [mAU]   | 峰面积 %       |          |       |   |        |      |        |            |            |         |   |        |      |        |            |            |         |
| 1                                                                                                                                                                       | 30.683                                                                                                                                                                                                                                                                                                                                                                                                                                                                          | MM   | 2.7329     | 884.58423   | 5.39467    | 50.8366     |          |       |   |        |      |        |            |            |         |   |        |      |        |            |            |         |
| 2                                                                                                                                                                       | 64.366                                                                                                                                                                                                                                                                                                                                                                                                                                                                          | BB   | 4.3490     | 855.46838   | 2.31189    | 49.1634     |          |       |   |        |      |        |            |            |         |   |        |      |        |            |            |         |
| 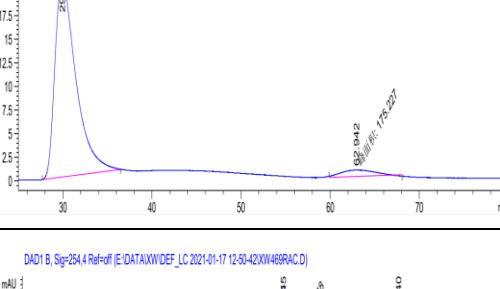 <p>DAD1 A, Sig=254.4 Ref=off (E:\data\XWDEF_LC 2021-01-28 09-32-34\XW58rac-2.D)</p> | 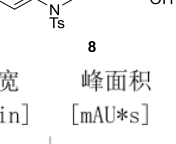 <p><b>8</b></p> <table><tr><th>峰 #</th><th>保留时间 [min]</th><th>类型</th><th>峰宽 [min]</th><th>峰面积 [mAU*s]</th><th>峰高 [mAU]</th><th>峰面积 %</th></tr><tr><td>1</td><td>29.931</td><td>BB</td><td>1.9524</td><td>3420.72388</td><td>20.93444</td><td>95.1271</td></tr><tr><td>2</td><td>62.942</td><td>MM</td><td>4.2200</td><td>175.22673</td><td>6.92045e-1</td><td>4.8729</td></tr></table>     | 峰 #  | 保留时间 [min] | 类型          | 峰宽 [min]   | 峰面积 [mAU*s] | 峰高 [mAU] | 峰面积 % | 1 | 29.931 | BB   | 1.9524 | 3420.72388 | 20.93444   | 95.1271 | 2 | 62.942 | MM   | 4.2200 | 175.22673  | 6.92045e-1 | 4.8729  |
| 峰 #                                                                                                                                                                     | 保留时间 [min]                                                                                                                                                                                                                                                                                                                                                                                                                                                                      | 类型   | 峰宽 [min]   | 峰面积 [mAU*s] | 峰高 [mAU]   | 峰面积 %       |          |       |   |        |      |        |            |            |         |   |        |      |        |            |            |         |
| 1                                                                                                                                                                       | 29.931                                                                                                                                                                                                                                                                                                                                                                                                                                                                          | BB   | 1.9524     | 3420.72388  | 20.93444   | 95.1271     |          |       |   |        |      |        |            |            |         |   |        |      |        |            |            |         |
| 2                                                                                                                                                                       | 62.942                                                                                                                                                                                                                                                                                                                                                                                                                                                                          | MM   | 4.2200     | 175.22673   | 6.92045e-1 | 4.8729      |          |       |   |        |      |        |            |            |         |   |        |      |        |            |            |         |
| 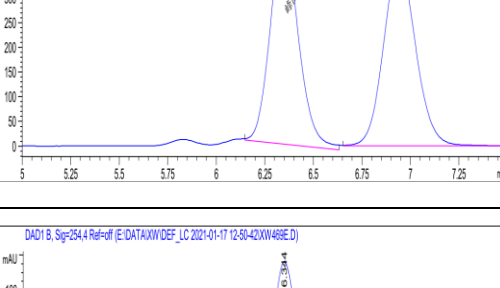 <p>DAD1 B, Sig=254.4 Ref=off (E:\data\XWDEF_LC 2021-01-17 12-50-42\XW469rac.D)</p>  | 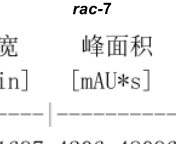 <p><b>rac-7</b></p> <table><tr><th>峰 #</th><th>保留时间 [min]</th><th>类型</th><th>峰宽 [min]</th><th>峰面积 [mAU*s]</th><th>峰高 [mAU]</th><th>峰面积 %</th></tr><tr><td>1</td><td>6.345</td><td>MM</td><td>0.1697</td><td>4206.48096</td><td>413.05505</td><td>49.3953</td></tr><tr><td>2</td><td>6.940</td><td>VB</td><td>0.1802</td><td>4309.47998</td><td>374.50867</td><td>50.6047</td></tr></table> | 峰 #  | 保留时间 [min] | 类型          | 峰宽 [min]   | 峰面积 [mAU*s] | 峰高 [mAU] | 峰面积 % | 1 | 6.345  | MM   | 0.1697 | 4206.48096 | 413.05505  | 49.3953 | 2 | 6.940  | VB   | 0.1802 | 4309.47998 | 374.50867  | 50.6047 |
| 峰 #                                                                                                                                                                     | 保留时间 [min]                                                                                                                                                                                                                                                                                                                                                                                                                                                                      | 类型   | 峰宽 [min]   | 峰面积 [mAU*s] | 峰高 [mAU]   | 峰面积 %       |          |       |   |        |      |        |            |            |         |   |        |      |        |            |            |         |
| 1                                                                                                                                                                       | 6.345                                                                                                                                                                                                                                                                                                                                                                                                                                                                           | MM   | 0.1697     | 4206.48096  | 413.05505  | 49.3953     |          |       |   |        |      |        |            |            |         |   |        |      |        |            |            |         |
| 2                                                                                                                                                                       | 6.940                                                                                                                                                                                                                                                                                                                                                                                                                                                                           | VB   | 0.1802     | 4309.47998  | 374.50867  | 50.6047     |          |       |   |        |      |        |            |            |         |   |        |      |        |            |            |         |
| 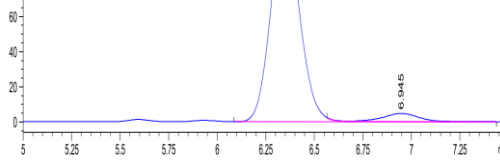 <p>DAD1 B, Sig=254.4 Ref=off (E:\data\XWDEF_LC 2021-01-17 12-50-42\XW469E.D)</p>    | 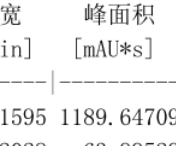 <p><b>7</b></p> <table><tr><th>峰 #</th><th>保留时间 [min]</th><th>类型</th><th>峰宽 [min]</th><th>峰面积 [mAU*s]</th><th>峰高 [mAU]</th><th>峰面积 %</th></tr><tr><td>1</td><td>6.344</td><td>BV R</td><td>0.1595</td><td>1189.64709</td><td>116.17513</td><td>94.8953</td></tr><tr><td>2</td><td>6.945</td><td>VB E</td><td>0.2028</td><td>63.99529</td><td>4.70021</td><td>5.1047</td></tr></table>      | 峰 #  | 保留时间 [min] | 类型          | 峰宽 [min]   | 峰面积 [mAU*s] | 峰高 [mAU] | 峰面积 % | 1 | 6.344  | BV R | 0.1595 | 1189.64709 | 116.17513  | 94.8953 | 2 | 6.945  | VB E | 0.2028 | 63.99529   | 4.70021    | 5.1047  |
| 峰 #                                                                                                                                                                     | 保留时间 [min]                                                                                                                                                                                                                                                                                                                                                                                                                                                                      | 类型   | 峰宽 [min]   | 峰面积 [mAU*s] | 峰高 [mAU]   | 峰面积 %       |          |       |   |        |      |        |            |            |         |   |        |      |        |            |            |         |
| 1                                                                                                                                                                       | 6.344                                                                                                                                                                                                                                                                                                                                                                                                                                                                           | BV R | 0.1595     | 1189.64709  | 116.17513  | 94.8953     |          |       |   |        |      |        |            |            |         |   |        |      |        |            |            |         |
| 2                                                                                                                                                                       | 6.945                                                                                                                                                                                                                                                                                                                                                                                                                                                                           | VB E | 0.2028     | 63.99529    | 4.70021    | 5.1047      |          |       |   |        |      |        |            |            |         |   |        |      |        |            |            |         |

| <p>DAD1 A, Sig=254.4 Ref=off (E:\DATA\FDDEF_LC 2020-12-16 13-42-17\XW1548.D)</p> 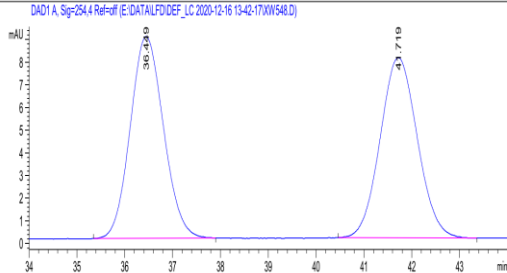          | <div><chem>C1=CC=C2C(=C1)C(=CN2C1CCOC1CBr)C3=CC=CC=C3</chem><p><b>rac-10</b></p></div> <table><thead><tr><th>峰 #</th><th>保留时间 [min]</th><th>类型</th><th>峰宽 [min]</th><th>峰面积 [mAU*s]</th><th>峰高 [mAU]</th><th>峰面积 %</th></tr></thead><tbody><tr><td>1</td><td>36.449</td><td>BB</td><td>0.7339</td><td>430.41171</td><td>8.90488</td><td>49.9697</td></tr><tr><td>2</td><td>41.719</td><td>BB</td><td>0.7919</td><td>430.93454</td><td>7.95633</td><td>50.0303</td></tr></tbody></table>                                                                                                                                                                                                                                        | 峰 # | 保留时间 [min] | 类型          | 峰宽 [min] | 峰面积 [mAU*s] | 峰高 [mAU] | 峰面积 % | 1 | 36.449 | BB | 0.7339 | 430.41171  | 8.90488  | 49.9697 | 2 | 41.719 | BB | 0.7919 | 430.93454  | 7.95633  | 50.0303 |   |        |    |        |            |          |         |   |        |    |        |           |          |        |
|-----------------------------------------------------------------------------------------------------------------------------------------------------------------------------|--------------------------------------------------------------------------------------------------------------------------------------------------------------------------------------------------------------------------------------------------------------------------------------------------------------------------------------------------------------------------------------------------------------------------------------------------------------------------------------------------------------------------------------------------------------------------------------------------------------------------------------------------------------------------------------------------------------------------------|-----|------------|-------------|----------|-------------|----------|-------|---|--------|----|--------|------------|----------|---------|---|--------|----|--------|------------|----------|---------|---|--------|----|--------|------------|----------|---------|---|--------|----|--------|-----------|----------|--------|
| 峰 #                                                                                                                                                                         | 保留时间 [min]                                                                                                                                                                                                                                                                                                                                                                                                                                                                                                                                                                                                                                                                                                                     | 类型  | 峰宽 [min]   | 峰面积 [mAU*s] | 峰高 [mAU] | 峰面积 %       |          |       |   |        |    |        |            |          |         |   |        |    |        |            |          |         |   |        |    |        |            |          |         |   |        |    |        |           |          |        |
| 1                                                                                                                                                                           | 36.449                                                                                                                                                                                                                                                                                                                                                                                                                                                                                                                                                                                                                                                                                                                         | BB  | 0.7339     | 430.41171   | 8.90488  | 49.9697     |          |       |   |        |    |        |            |          |         |   |        |    |        |            |          |         |   |        |    |        |            |          |         |   |        |    |        |           |          |        |
| 2                                                                                                                                                                           | 41.719                                                                                                                                                                                                                                                                                                                                                                                                                                                                                                                                                                                                                                                                                                                         | BB  | 0.7919     | 430.93454   | 7.95633  | 50.0303     |          |       |   |        |    |        |            |          |         |   |        |    |        |            |          |         |   |        |    |        |            |          |         |   |        |    |        |           |          |        |
| <p>DAD1 A, Sig=254.4 Ref=off (Snapshot.D)</p> 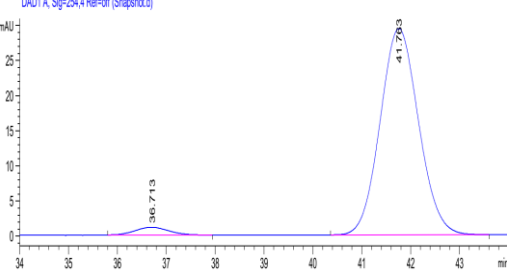                                             | <div><chem>C1=CC=C2C(=C1)C(=CN2C1CCOC1[C@H](CBr)[C@H]3C=CC=CC=C3)C3=CC=CC=C3</chem><p><b>10</b></p></div> <table><thead><tr><th>峰 #</th><th>保留时间 [min]</th><th>类型</th><th>峰宽 [min]</th><th>峰面积 [mAU*s]</th><th>峰高 [mAU]</th><th>峰面积 %</th></tr></thead><tbody><tr><td>1</td><td>36.713</td><td>BB</td><td>0.5783</td><td>53.81527</td><td>1.10861</td><td>3.2431</td></tr><tr><td>2</td><td>41.763</td><td>BB</td><td>0.8525</td><td>1605.55212</td><td>29.33435</td><td>96.7569</td></tr></tbody></table>                                                                                                                                                                                                                     | 峰 # | 保留时间 [min] | 类型          | 峰宽 [min] | 峰面积 [mAU*s] | 峰高 [mAU] | 峰面积 % | 1 | 36.713 | BB | 0.5783 | 53.81527   | 1.10861  | 3.2431  | 2 | 41.763 | BB | 0.8525 | 1605.55212 | 29.33435 | 96.7569 |   |        |    |        |            |          |         |   |        |    |        |           |          |        |
| 峰 #                                                                                                                                                                         | 保留时间 [min]                                                                                                                                                                                                                                                                                                                                                                                                                                                                                                                                                                                                                                                                                                                     | 类型  | 峰宽 [min]   | 峰面积 [mAU*s] | 峰高 [mAU] | 峰面积 %       |          |       |   |        |    |        |            |          |         |   |        |    |        |            |          |         |   |        |    |        |            |          |         |   |        |    |        |           |          |        |
| 1                                                                                                                                                                           | 36.713                                                                                                                                                                                                                                                                                                                                                                                                                                                                                                                                                                                                                                                                                                                         | BB  | 0.5783     | 53.81527    | 1.10861  | 3.2431      |          |       |   |        |    |        |            |          |         |   |        |    |        |            |          |         |   |        |    |        |            |          |         |   |        |    |        |           |          |        |
| 2                                                                                                                                                                           | 41.763                                                                                                                                                                                                                                                                                                                                                                                                                                                                                                                                                                                                                                                                                                                         | BB  | 0.8525     | 1605.55212  | 29.33435 | 96.7569     |          |       |   |        |    |        |            |          |         |   |        |    |        |            |          |         |   |        |    |        |            |          |         |   |        |    |        |           |          |        |
| <p>DAD1 B, Sig=254.16 Ref=360,100 (E:\DATA\XWDEF_LC 2021-01-23 08-14-18\XW1575RAC.D)</p> 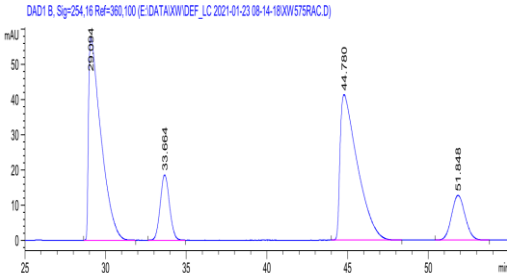 | <div><chem>COC(=O)C1=CC=CC=C2C(=C1)C(=CN2C1CC=CC1)C3=CC=CC=C3</chem><p><b>rac-9</b></p></div> <table><thead><tr><th>峰 #</th><th>保留时间 [min]</th><th>类型</th><th>峰宽 [min]</th><th>峰面积 [mAU*s]</th><th>峰高 [mAU]</th><th>峰面积 %</th></tr></thead><tbody><tr><td>1</td><td>29.094</td><td>BB</td><td>0.7609</td><td>3091.18457</td><td>57.70707</td><td>40.3124</td></tr><tr><td>2</td><td>33.664</td><td>BB</td><td>0.6241</td><td>741.50812</td><td>18.55898</td><td>9.6701</td></tr><tr><td>3</td><td>44.780</td><td>BB</td><td>1.0761</td><td>3093.11084</td><td>41.37868</td><td>40.3375</td></tr><tr><td>4</td><td>51.848</td><td>BB</td><td>0.9110</td><td>742.26953</td><td>12.71574</td><td>9.6800</td></tr></tbody></table> | 峰 # | 保留时间 [min] | 类型          | 峰宽 [min] | 峰面积 [mAU*s] | 峰高 [mAU] | 峰面积 % | 1 | 29.094 | BB | 0.7609 | 3091.18457 | 57.70707 | 40.3124 | 2 | 33.664 | BB | 0.6241 | 741.50812  | 18.55898 | 9.6701  | 3 | 44.780 | BB | 1.0761 | 3093.11084 | 41.37868 | 40.3375 | 4 | 51.848 | BB | 0.9110 | 742.26953 | 12.71574 | 9.6800 |
| 峰 #                                                                                                                                                                         | 保留时间 [min]                                                                                                                                                                                                                                                                                                                                                                                                                                                                                                                                                                                                                                                                                                                     | 类型  | 峰宽 [min]   | 峰面积 [mAU*s] | 峰高 [mAU] | 峰面积 %       |          |       |   |        |    |        |            |          |         |   |        |    |        |            |          |         |   |        |    |        |            |          |         |   |        |    |        |           |          |        |
| 1                                                                                                                                                                           | 29.094                                                                                                                                                                                                                                                                                                                                                                                                                                                                                                                                                                                                                                                                                                                         | BB  | 0.7609     | 3091.18457  | 57.70707 | 40.3124     |          |       |   |        |    |        |            |          |         |   |        |    |        |            |          |         |   |        |    |        |            |          |         |   |        |    |        |           |          |        |
| 2                                                                                                                                                                           | 33.664                                                                                                                                                                                                                                                                                                                                                                                                                                                                                                                                                                                                                                                                                                                         | BB  | 0.6241     | 741.50812   | 18.55898 | 9.6701      |          |       |   |        |    |        |            |          |         |   |        |    |        |            |          |         |   |        |    |        |            |          |         |   |        |    |        |           |          |        |
| 3                                                                                                                                                                           | 44.780                                                                                                                                                                                                                                                                                                                                                                                                                                                                                                                                                                                                                                                                                                                         | BB  | 1.0761     | 3093.11084  | 41.37868 | 40.3375     |          |       |   |        |    |        |            |          |         |   |        |    |        |            |          |         |   |        |    |        |            |          |         |   |        |    |        |           |          |        |
| 4                                                                                                                                                                           | 51.848                                                                                                                                                                                                                                                                                                                                                                                                                                                                                                                                                                                                                                                                                                                         | BB  | 0.9110     | 742.26953   | 12.71574 | 9.6800      |          |       |   |        |    |        |            |          |         |   |        |    |        |            |          |         |   |        |    |        |            |          |         |   |        |    |        |           |          |        |
| <p>DAD1 B, Sig=254.16 Ref=360,100 (E:\DATA\XWDEF_LC 2021-01-23 12-15-30\XW1575a.D)</p> 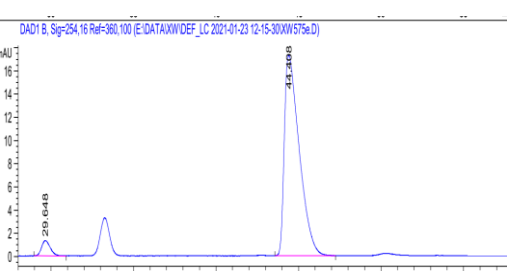  | <div><chem>COC(=O)C1=CC=CC=C2C(=C1)C(=CN2C1CC=CC1)[C@H]3C=CC=CC=C3</chem><p><b>9</b></p></div> <table><thead><tr><th>峰 #</th><th>保留时间 [min]</th><th>类型</th><th>峰宽 [min]</th><th>峰面积 [mAU*s]</th><th>峰高 [mAU]</th><th>峰面积 %</th></tr></thead><tbody><tr><td>1</td><td>29.648</td><td>BB</td><td>0.5262</td><td>48.63472</td><td>1.32517</td><td>4.2916</td></tr><tr><td>2</td><td>44.408</td><td>BB</td><td>0.9039</td><td>1084.60693</td><td>17.28784</td><td>95.7084</td></tr></tbody></table>                                                                                                                                                                                                                                | 峰 # | 保留时间 [min] | 类型          | 峰宽 [min] | 峰面积 [mAU*s] | 峰高 [mAU] | 峰面积 % | 1 | 29.648 | BB | 0.5262 | 48.63472   | 1.32517  | 4.2916  | 2 | 44.408 | BB | 0.9039 | 1084.60693 | 17.28784 | 95.7084 |   |        |    |        |            |          |         |   |        |    |        |           |          |        |
| 峰 #                                                                                                                                                                         | 保留时间 [min]                                                                                                                                                                                                                                                                                                                                                                                                                                                                                                                                                                                                                                                                                                                     | 类型  | 峰宽 [min]   | 峰面积 [mAU*s] | 峰高 [mAU] | 峰面积 %       |          |       |   |        |    |        |            |          |         |   |        |    |        |            |          |         |   |        |    |        |            |          |         |   |        |    |        |           |          |        |
| 1                                                                                                                                                                           | 29.648                                                                                                                                                                                                                                                                                                                                                                                                                                                                                                                                                                                                                                                                                                                         | BB  | 0.5262     | 48.63472    | 1.32517  | 4.2916      |          |       |   |        |    |        |            |          |         |   |        |    |        |            |          |         |   |        |    |        |            |          |         |   |        |    |        |           |          |        |
| 2                                                                                                                                                                           | 44.408                                                                                                                                                                                                                                                                                                                                                                                                                                                                                                                                                                                                                                                                                                                         | BB  | 0.9039     | 1084.60693  | 17.28784 | 95.7084     |          |       |   |        |    |        |            |          |         |   |        |    |        |            |          |         |   |        |    |        |            |          |         |   |        |    |        |           |          |        |
